# Supplementary material for: Synthesis of substituted exo-glucals via a modified Julia olefination and identification as selective β-glucosidase inhibitors
Source: Royal Society of Chemistry journal article supplement (doi:10.1039/c3ob41926f), 2013-11-20

## Supporting Information

### Synthesis of substituted exo-glucals *via* a Julia modified olefination and identification as selective $\beta$ -glucosidase inhibitors.

Samuel Habib,<sup>a</sup> Florent Larnaud,<sup>b</sup> Emmanuel Pfund,<sup>b</sup> Teresa Mena,<sup>c</sup> Thierry Lequeux,<sup>b</sup> Carmen Ortiz Mellet,<sup>c</sup> Peter G. Goekjian,<sup>a</sup> David Gueyrard<sup>\*a</sup>

*a) Université de Lyon, ICBMS, UMR 5246 - CNRS, Bat. 308 – Curien (CPE Lyon), Université Claude Bernard Lyon 1, 43 Bld. du 11 Novembre 1918, F-69622 Villeurbanne, France.*

*b) Laboratoire de Chimie Moléculaire et Thioorganique, UMR CNRS 6507, ENSICAEN Université de Caen Basse-Normandie, 6 Bd du Maréchal Juin 14050 Caen Cedex, France*

*c) Departamento de Química Organica, Facultad de Química, Universidad de Sevilla, c/Profesor Garcia Gonzalez 1, 41012 Sevilla, Spain.*

[david.gueyrard@univ-lyon1.fr](mailto:david.gueyrard@univ-lyon1.fr)

#### Table of Contents :

|                                                                                                      |            |
|------------------------------------------------------------------------------------------------------|------------|
| General methods and materials, procedure for synthesis of compound <b>1</b> .....                    | <b>S3</b>  |
| Spectroscopic data :                                                                                 |            |
| <sup>1</sup> H, <sup>13</sup> C spectra of compound <b>1</b> .....                                   | <b>S4</b>  |
| <sup>1</sup> H, <sup>13</sup> C spectra of compound <b>2Z</b> .....                                  | <b>S5</b>  |
| <sup>1</sup> H, <sup>13</sup> C spectra of compound <b>2E</b> .....                                  | <b>S6</b>  |
| <sup>1</sup> H, <sup>13</sup> C spectra of compound <b>3E</b> .....                                  | <b>S7</b>  |
| <sup>19</sup> F spectra of compound <b>3E</b> , <sup>1</sup> H spectra of compound <b>3Z</b> .....   | <b>S8</b>  |
| <sup>13</sup> C, <sup>19</sup> F spectra of compound <b>3-Z</b> .....                                | <b>S9</b>  |
| <sup>1</sup> H, <sup>13</sup> C spectra of compound <b>4Z</b> .....                                  | <b>S10</b> |
| <sup>1</sup> H, <sup>13</sup> C spectra of compound <b>4E</b> .....                                  | <b>S11</b> |
| <sup>1</sup> H, <sup>13</sup> C spectra of compound <b>5E</b> .....                                  | <b>S12</b> |
| <sup>19</sup> F spectra of compound <b>5E</b> , <sup>1</sup> H spectra of compound <b>5Z</b> .....   | <b>S13</b> |
| <sup>13</sup> C, <sup>19</sup> F spectra of compound <b>5-Z</b> .....                                | <b>S14</b> |
| <sup>1</sup> H, <sup>13</sup> C spectra of compound <b>7E</b> .....                                  | <b>S15</b> |
| <sup>19</sup> F spectra of compound <b>7E</b> , <sup>1</sup> H spectra of compound <b>7Z</b> .....   | <b>S16</b> |
| <sup>13</sup> C, <sup>19</sup> F spectra of compound <b>7-Z</b> .....                                | <b>S17</b> |
| <sup>1</sup> H, <sup>13</sup> C spectra of compound <b>8Z</b> .....                                  | <b>S18</b> |
| <sup>1</sup> H, <sup>13</sup> C spectra of compound <b>8E</b> .....                                  | <b>S19</b> |
| <sup>1</sup> H, <sup>13</sup> C spectra of compound <b>9E</b> .....                                  | <b>S20</b> |
| <sup>19</sup> F spectra of compound <b>9E</b> , <sup>1</sup> H spectra of compound <b>9Z</b> .....   | <b>S21</b> |
| <sup>13</sup> C, <sup>19</sup> F spectra of compound <b>9Z</b> .....                                 | <b>S22</b> |
| <sup>1</sup> H, <sup>13</sup> C spectra of compound <b>10Z</b> .....                                 | <b>S23</b> |
| <sup>1</sup> H, <sup>13</sup> C spectra of compound <b>10E</b> .....                                 | <b>S24</b> |
| <sup>1</sup> H, <sup>13</sup> C spectra of compound <b>11E</b> .....                                 | <b>S25</b> |
| <sup>19</sup> F spectra of compound <b>11E</b> , <sup>1</sup> H spectra of compound <b>11Z</b> ..... | <b>S26</b> |
| <sup>13</sup> C, <sup>19</sup> F spectra of compound <b>11Z</b> .....                                | <b>S27</b> |
| <sup>1</sup> H, <sup>13</sup> C spectra of compound <b>12Z</b> .....                                 | <b>S28</b> |
| <sup>1</sup> H, <sup>13</sup> C spectra of compound <b>12E</b> .....                                 | <b>S29</b> |
| <sup>1</sup> H, <sup>13</sup> C spectra of compound <b>13E</b> .....                                 | <b>S30</b> |

|                                                                                                      |            |
|------------------------------------------------------------------------------------------------------|------------|
| <sup>19</sup> F spectra of compound <b>13E</b> , <sup>1</sup> H spectra of compound <b>13Z</b> ..... | <b>S31</b> |
| <sup>13</sup> C, <sup>19</sup> F spectra of compound <b>13Z</b> .....                                | <b>S32</b> |
| <sup>1</sup> H, <sup>13</sup> C spectra of compound <b>14E</b> .....                                 | <b>S33</b> |
| <sup>1</sup> H, <sup>13</sup> C spectra of compound <b>14Z</b> .....                                 | <b>S34</b> |
| <sup>1</sup> H, <sup>13</sup> C spectra of compound <b>15Z</b> .....                                 | <b>S35</b> |
| <sup>19</sup> F spectra of compound <b>15Z</b> , <sup>1</sup> H spectra of compound <b>15E</b> ..... | <b>S36</b> |
| <sup>13</sup> C, <sup>19</sup> F spectra of compound <b>15E</b> .....                                | <b>S37</b> |
| <sup>1</sup> H, <sup>13</sup> C spectra of compound <b>16E</b> .....                                 | <b>S38</b> |
| <sup>1</sup> H, <sup>13</sup> C spectra of compound <b>16Z</b> .....                                 | <b>S39</b> |
| <sup>1</sup> H, <sup>13</sup> C spectra of compound <b>17Z</b> .....                                 | <b>S40</b> |
| <sup>19</sup> F spectra of compound <b>17Z</b> , <sup>1</sup> H spectra of compound <b>17E</b> ..... | <b>S41</b> |
| <sup>13</sup> C, <sup>19</sup> F spectra of compound <b>17E</b> .....                                | <b>S42</b> |
| <sup>1</sup> H, <sup>13</sup> C spectra of compound <b>18E</b> .....                                 | <b>S43</b> |
| <sup>1</sup> H, <sup>13</sup> C spectra of compound <b>18Z</b> .....                                 | <b>S44</b> |
| <sup>1</sup> H, <sup>13</sup> C spectra of compound <b>19E</b> .....                                 | <b>S45</b> |
| <sup>19</sup> F spectra of compound <b>19E</b> , <sup>1</sup> H spectra of compound <b>19Z</b> ..... | <b>S46</b> |
| <sup>13</sup> C, <sup>19</sup> F spectra of compound <b>19Z</b> .....                                | <b>S47</b> |

## General methods and materials

All reactions were carried out under an argon atmosphere. Solvents were distilled and dried by standard methods. Reactions were performed under argon atmosphere. NMR spectra were recorded at 293 K, unless stated otherwise, using a 300 MHz, a 400 MHz or a 500 MHz spectrometer. Shifts are referenced relative to deuterated solvent residual peaks. The following abbreviations are used to explain the observed multiplicities: s, singlet; d, doublet; dd, doublet of doublets; ddd, doublet of doublets of doublets; t, triplet; td, triplet of doublets; m, multiplet; bs, broad singlet. <sup>13</sup>C NMR multiplicities are based on DEPT experiments. Low and high resolutions mass spectra were recorded using a Bruker MicrOTOF-Q II XL spectrometer. Thin-layer chromatography (TLC) was carried out on aluminium sheets coated with silica gel 60 F<sub>254</sub> (Merck). TLC plates were inspected by UV light (λ = 254 nm) and developed by treatment with a solution of 10% H<sub>2</sub>SO<sub>4</sub> in EtOH/H<sub>2</sub>O (1:1 v/v) followed by heating. Alumina gel column chromatography was performed with aluminium oxide basic Brockmann Activity 1 (50-200 μm). Silica gel column chromatography was performed with silica gel Si 60 (40–63 μm). Optical rotations were measured using a Perkin Elmer polarimeter and values are given in 10<sup>-1</sup> deg.cm<sup>2</sup>.g<sup>-1</sup>.

### 2,3,4,6-tetra-*O*-(triethylsilyl)-D-glucopyrano-1,5-lactone (**1**)

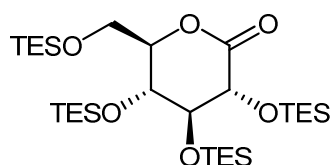

Chemical Formula: C<sub>30</sub>H<sub>66</sub>O<sub>6</sub>Si<sub>4</sub>  
Exact Mass: 634,3936

To a solution of D-gluconolactone (1.5 g, 8.427 mmol, 1.0 eq.) in DMF at room temperature were added imidazole (4.6 g, 67.65 mmol, 8.0 eq.) and chlorotriethylsilane (6.9 mL, 40.46 mmol, 4.8 eq.). The mixture was stirred overnight, hydrolyzed with water, diluted with ethyl acetate and water, extracted with ethyl acetate. The combined organic layers were washed with water, brine, dried over anhydrous sodium sulphate, filtered and concentrated *in vacuo*, to afford the compound **1** as colorless oil. Yield (4.81 g, 7.587 mmol, 90%).

<sup>1</sup>H NMR (300 MHz, CDCl<sub>3</sub>) δ 4.56 (ddd, *J* = 7.6, 4.1, 2.5 Hz, 1H), 4.12 (dd, *J* = 3.8, 0.9 Hz, 1H), 4.00 (ddd, *J* = 7.7, 1.5, 0.9 Hz, 1H), 3.94 – 3.85 (m, 2H), 3.80 (dd, *J* = 11.8, 4.2 Hz, 1H), 0.99 – 0.92 (m, 36H), 0.69 – 0.55 (m, 25H).

<sup>13</sup>C NMR (75 MHz, CDCl<sub>3</sub>) δ 170.2 (C<sup>IV</sup>), 81.8 (CH), 77.6 (CH), 74.1 (CH), 71.4 (CH), 62.1 (CH<sub>2</sub>), 7.1 (CH<sub>3</sub>), 7.1 (CH<sub>3</sub>), 7.1 (CH<sub>3</sub>), 7.0 (CH<sub>3</sub>), 6.9 (CH<sub>3</sub>), 6.8 (CH<sub>3</sub>), 5.3 (CH<sub>2</sub>), 5.0 (CH<sub>2</sub>), 4.8 (CH<sub>2</sub>).

[α]<sub>D</sub><sup>20</sup>: + 45.9° (c 1.03, CHCl<sub>3</sub>)

HRMS (ESI<sup>+</sup>): 657.3807 [MNa<sup>+</sup>] – Calc: 657.3829



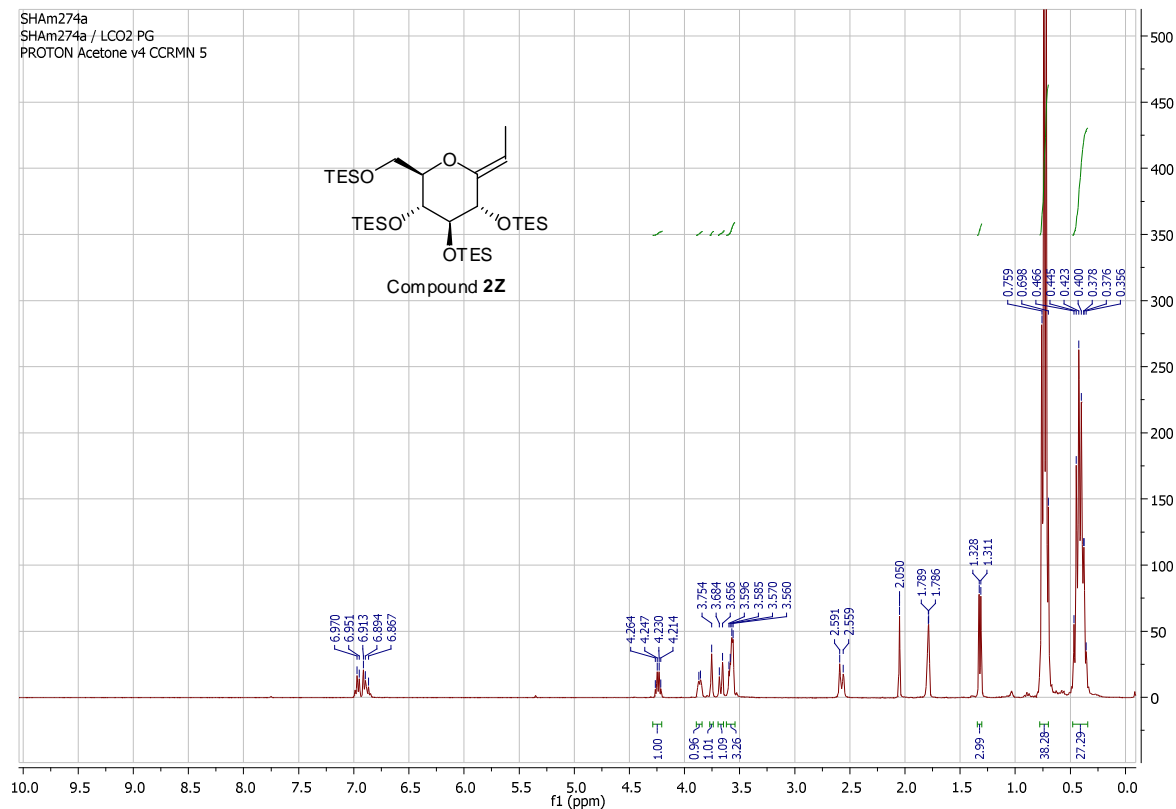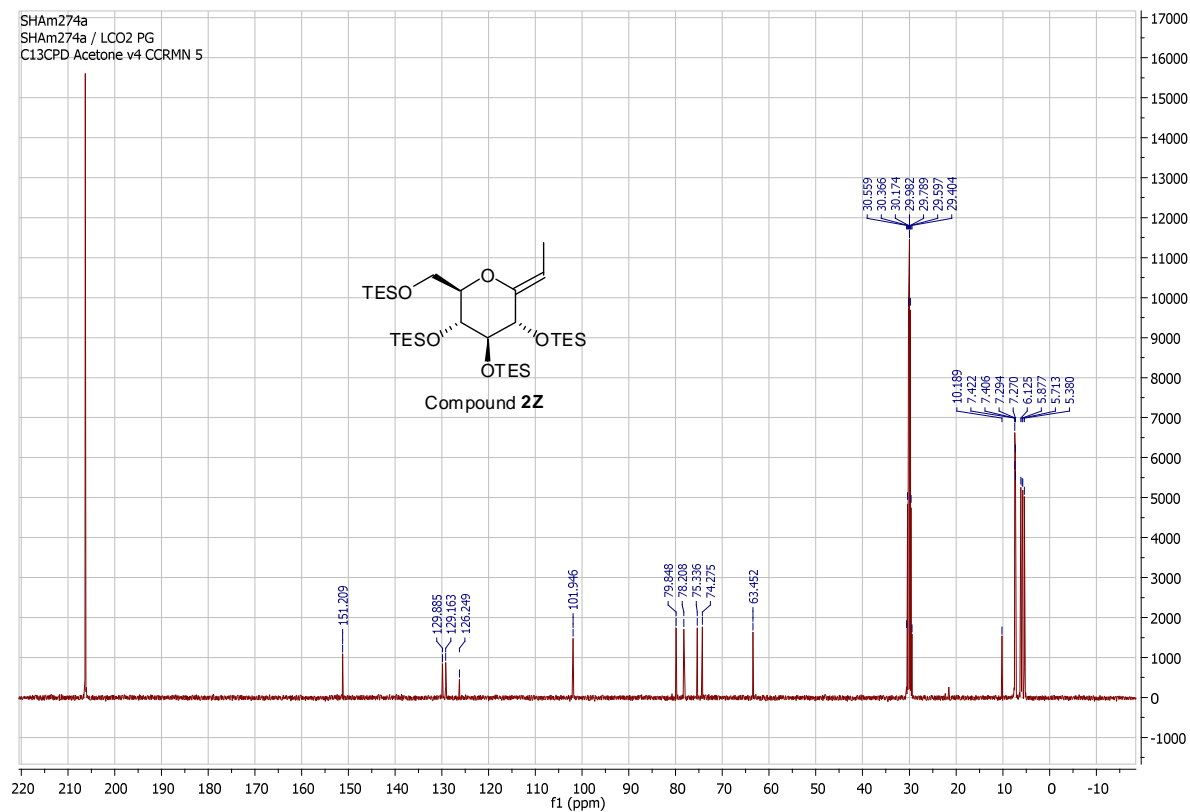

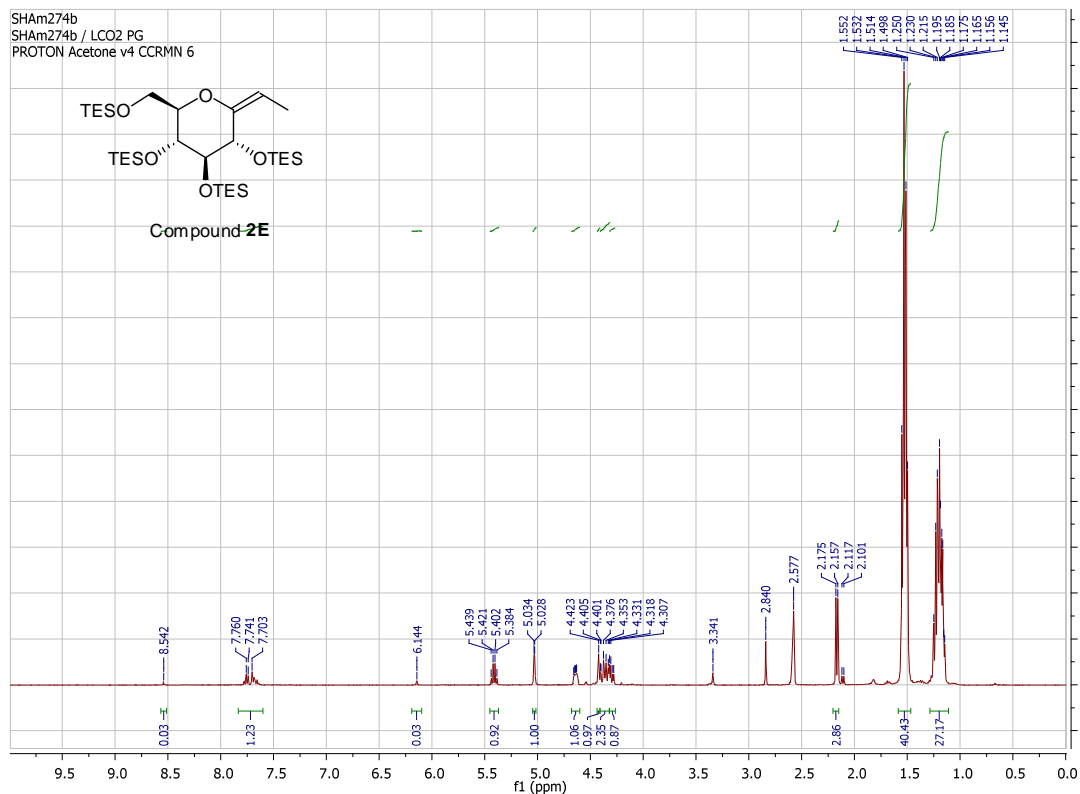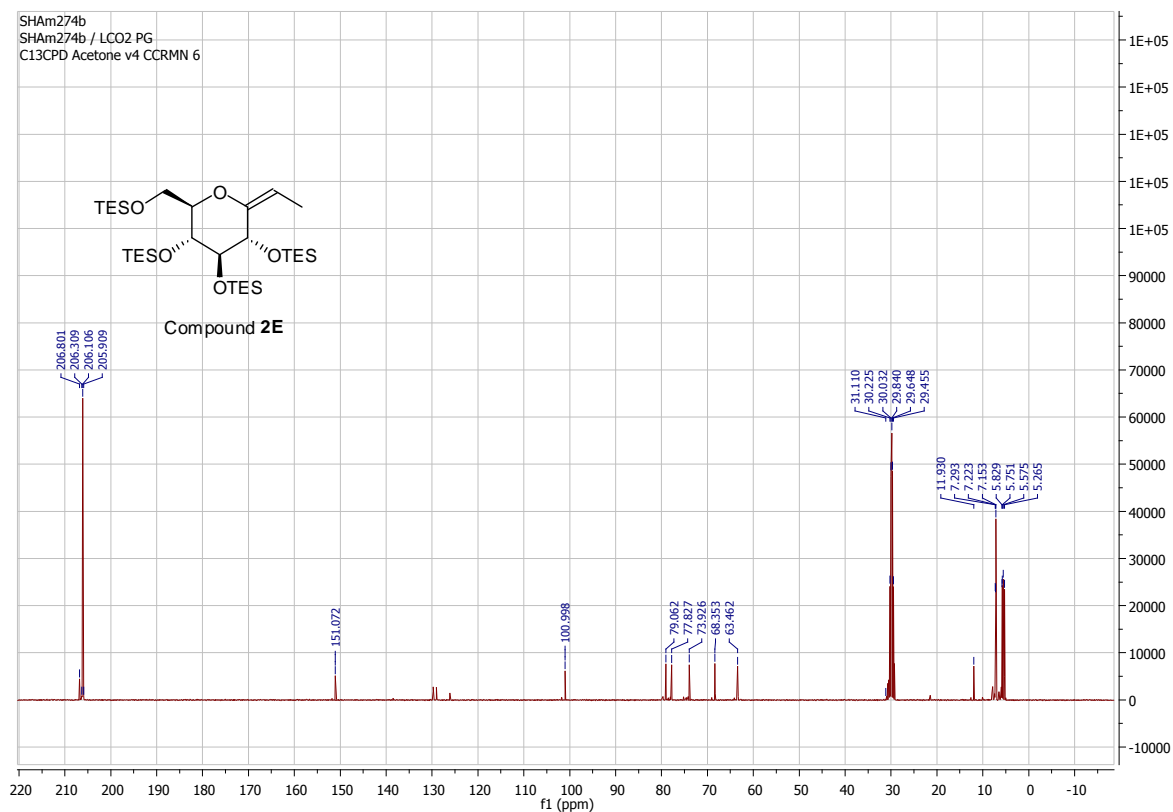

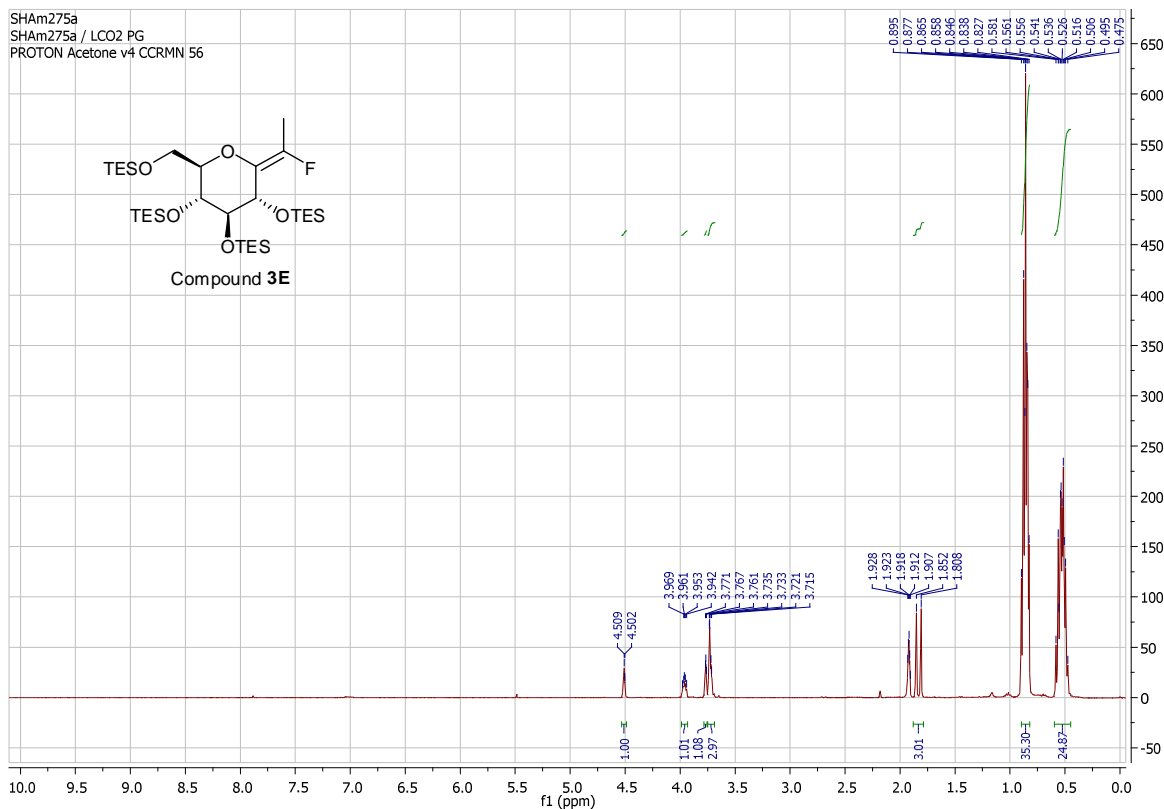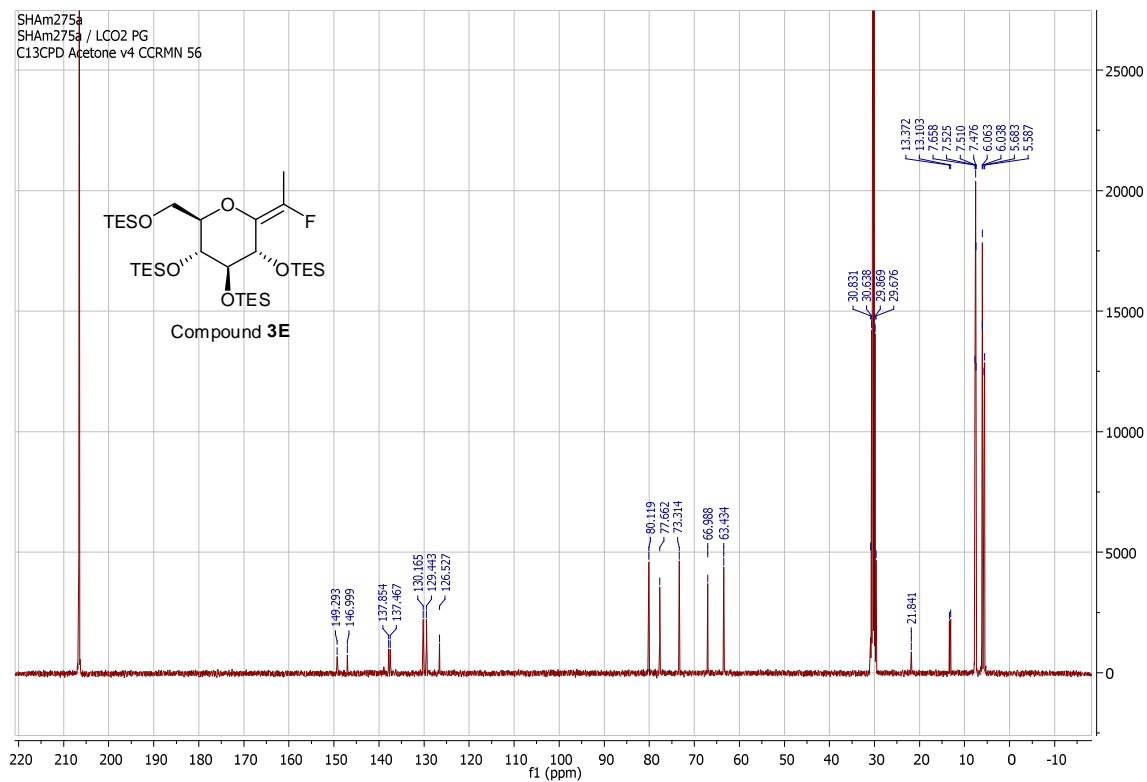

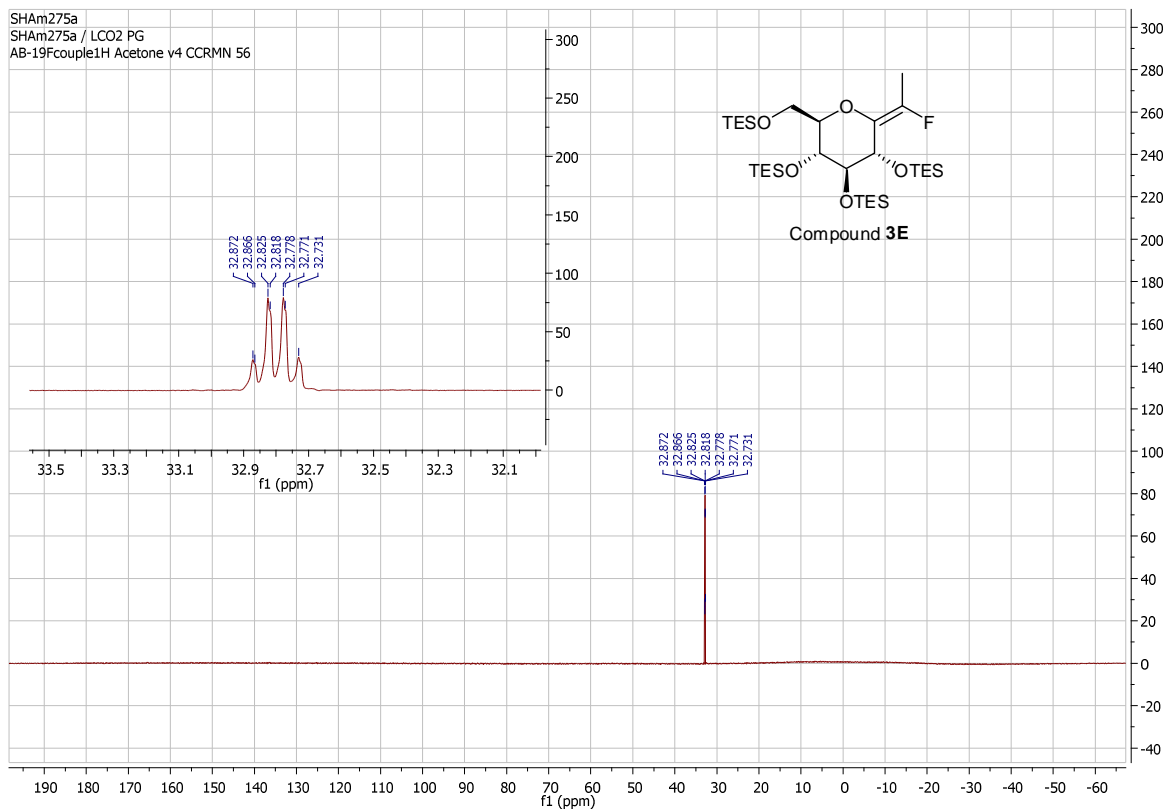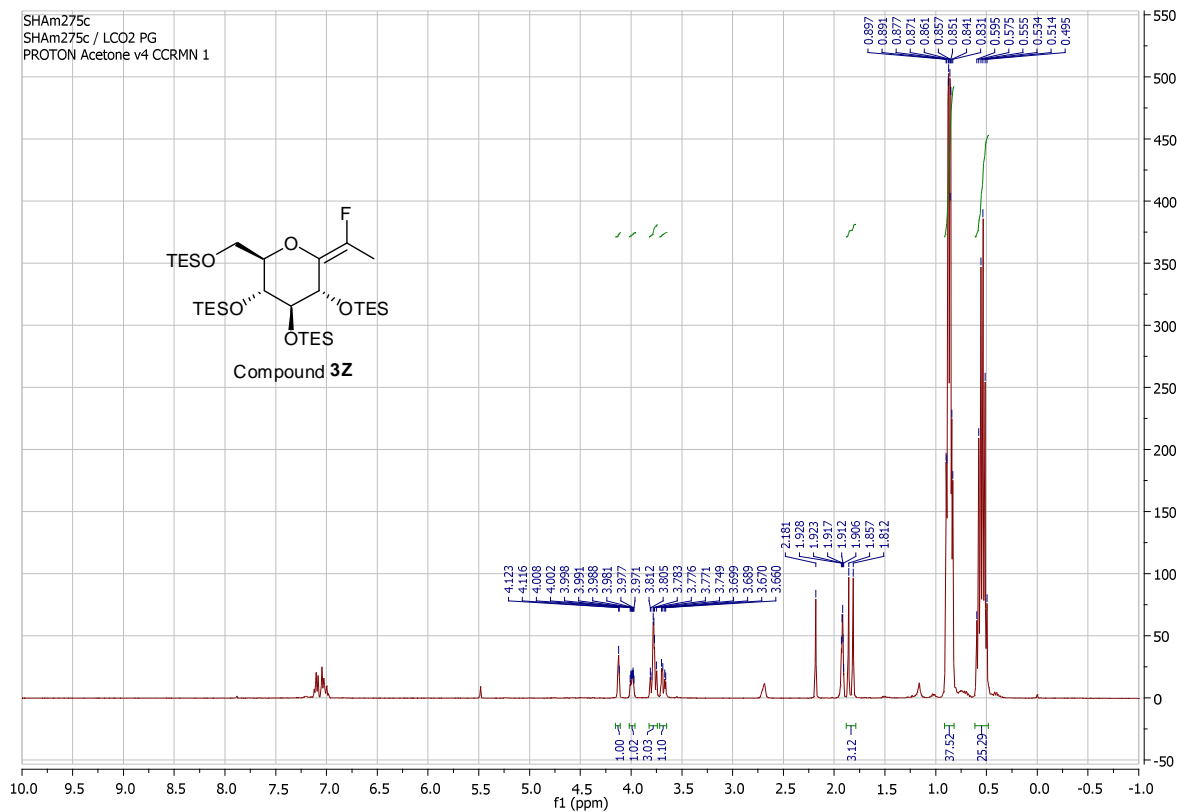



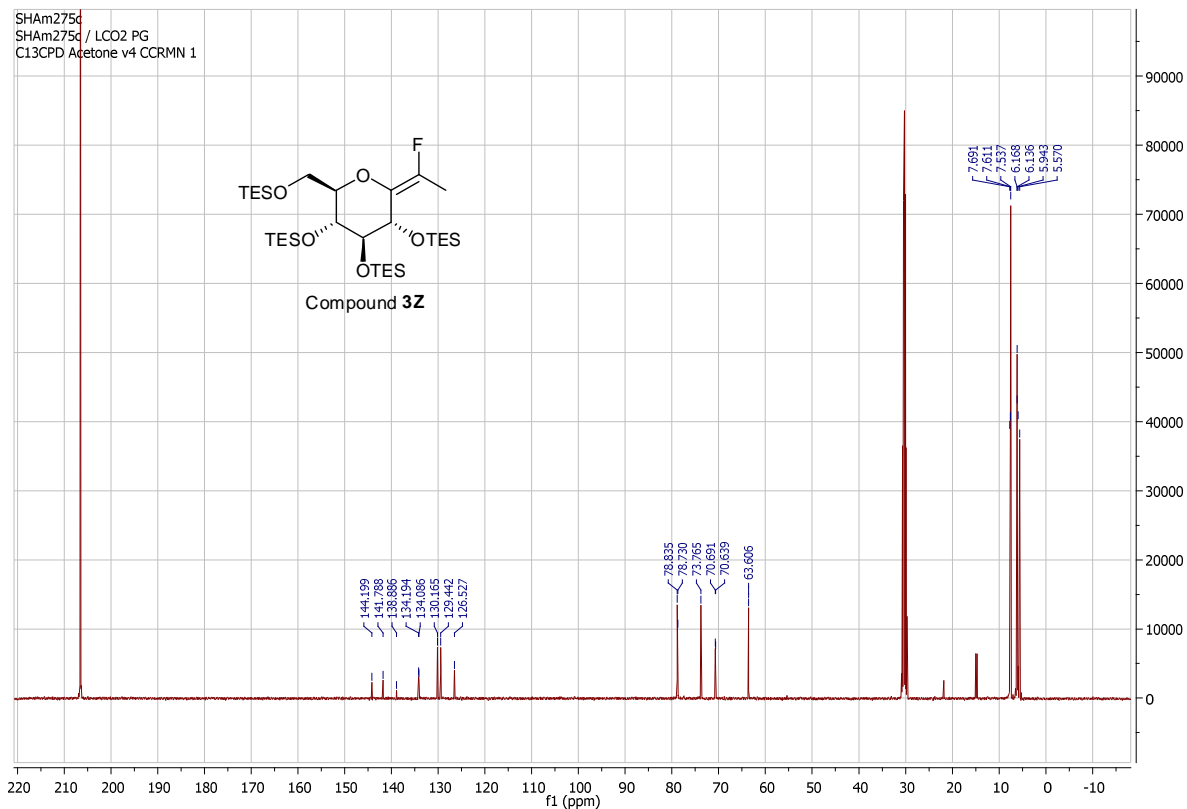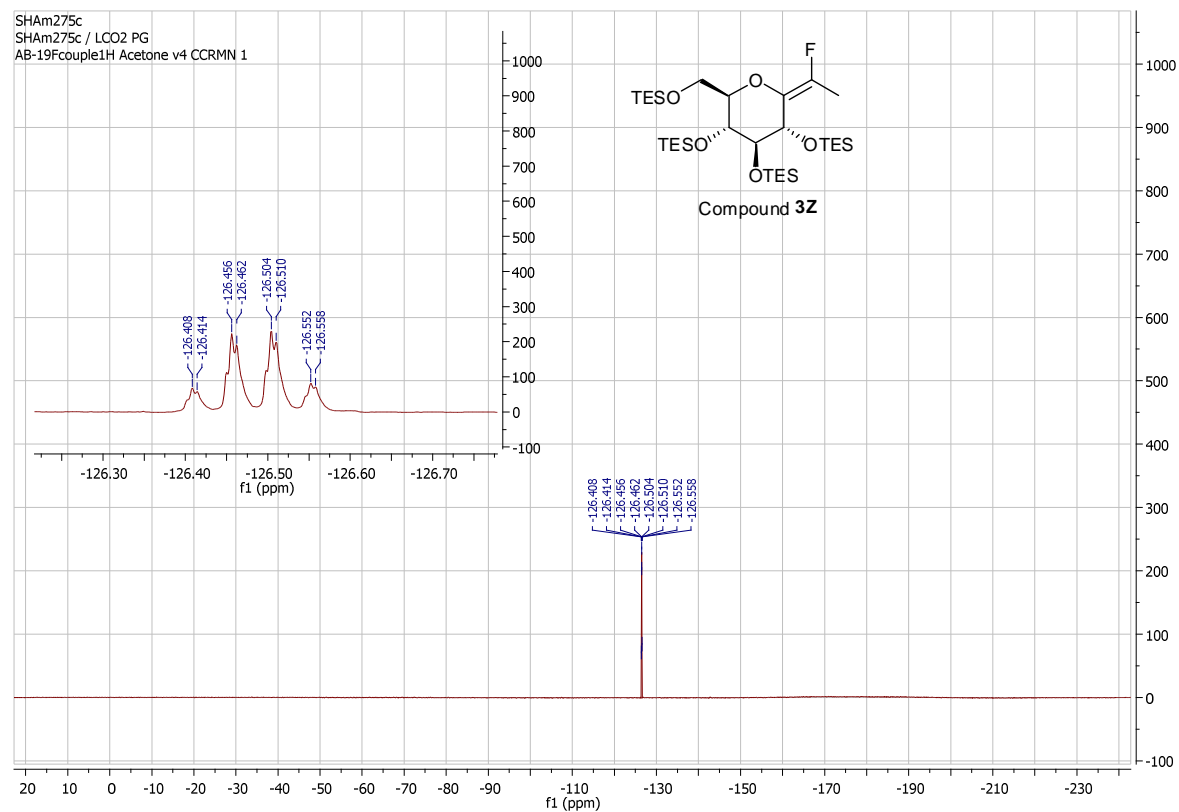



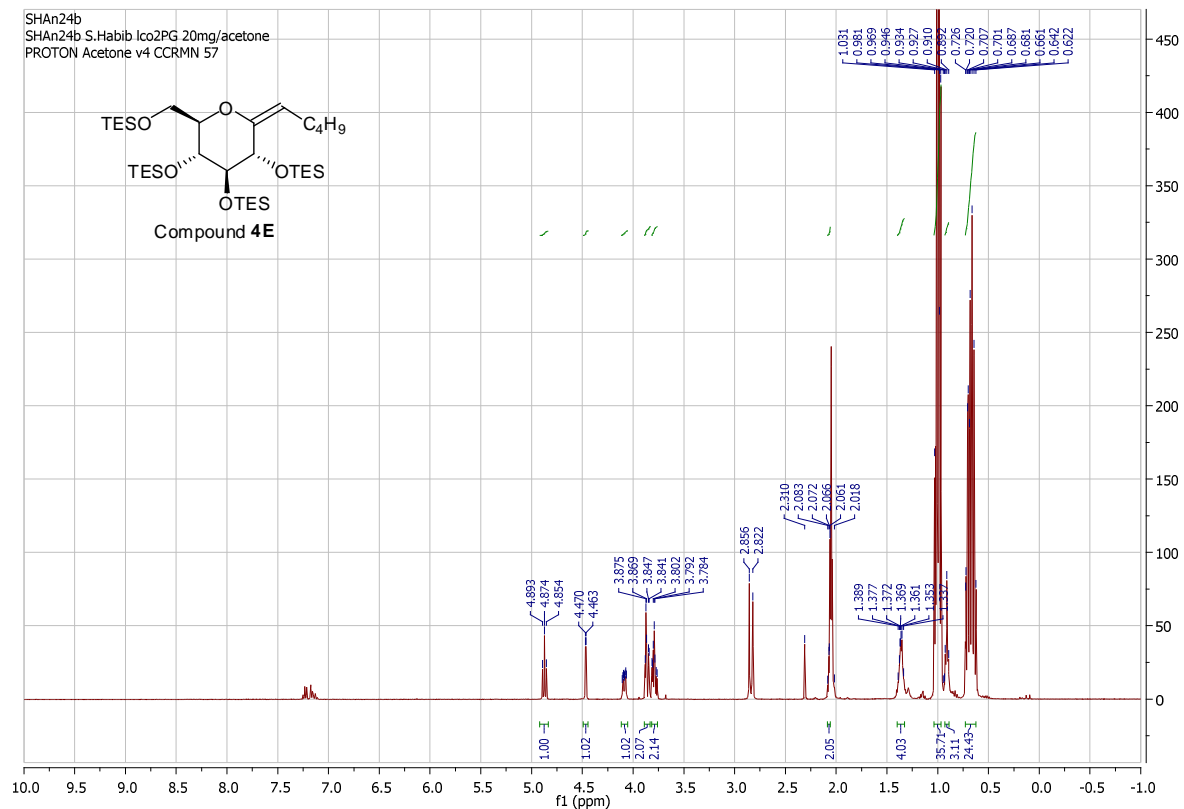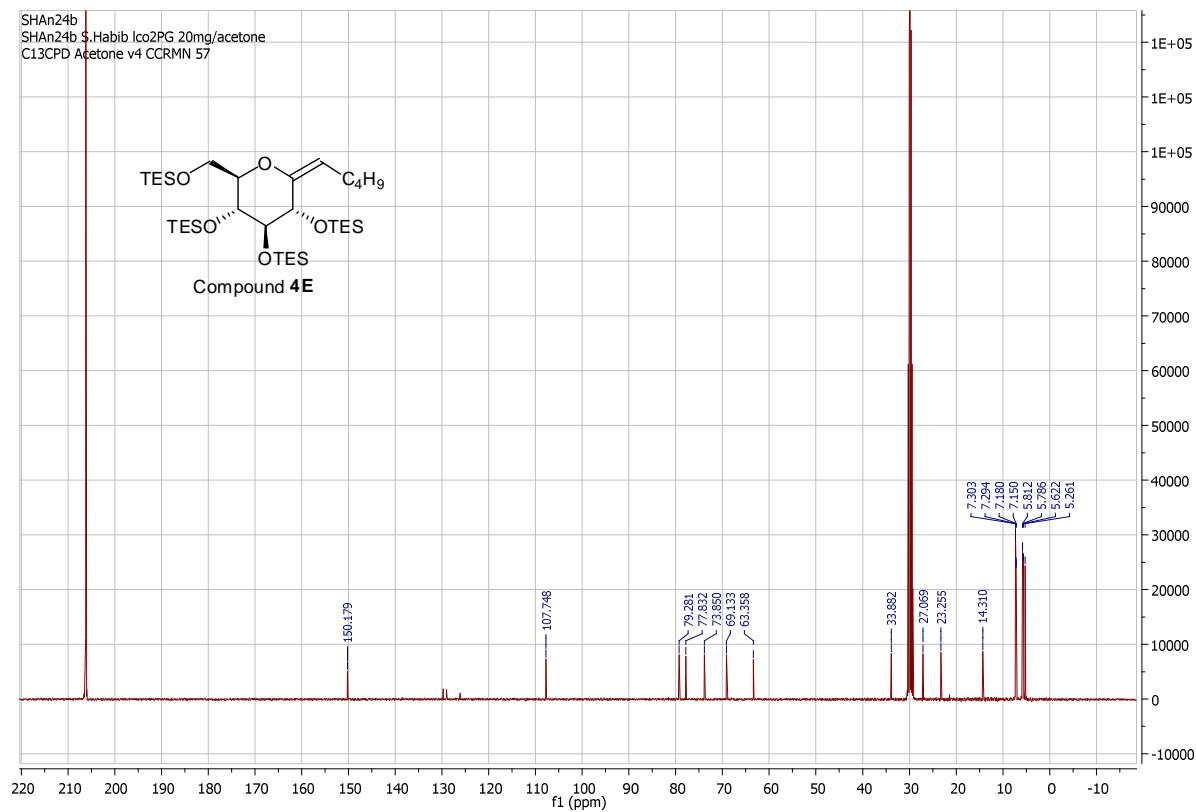

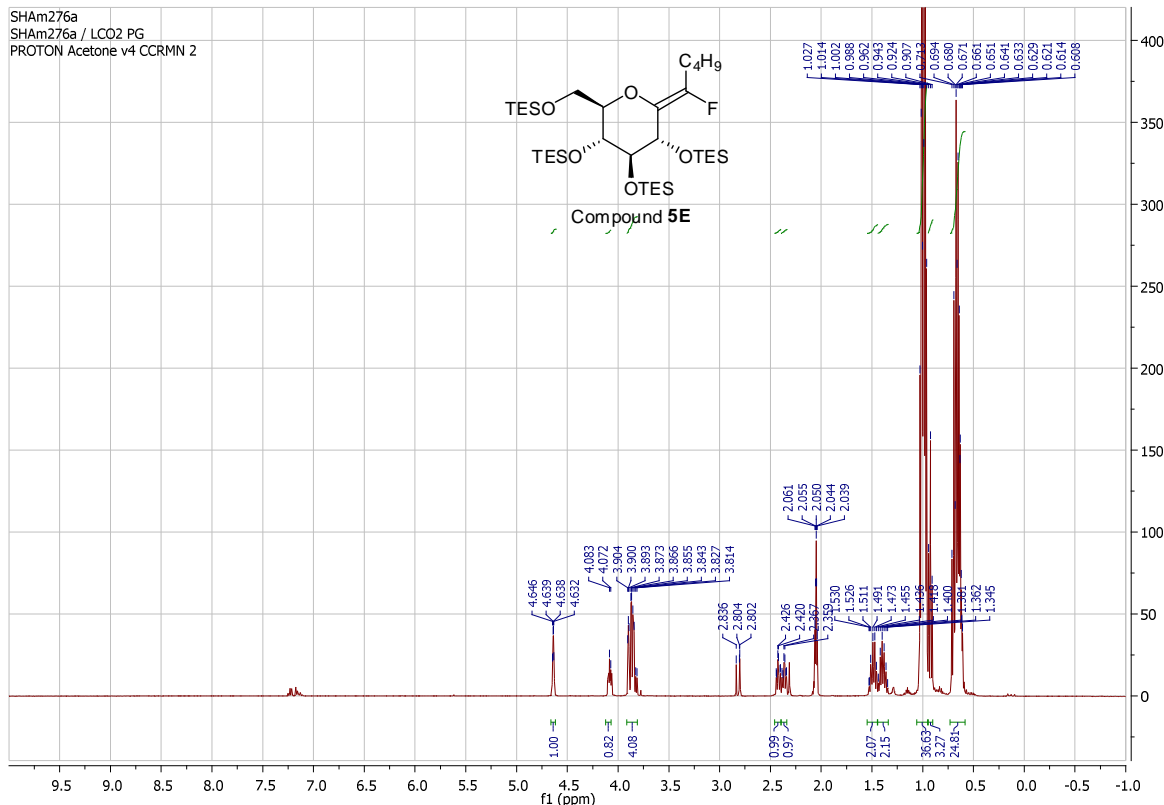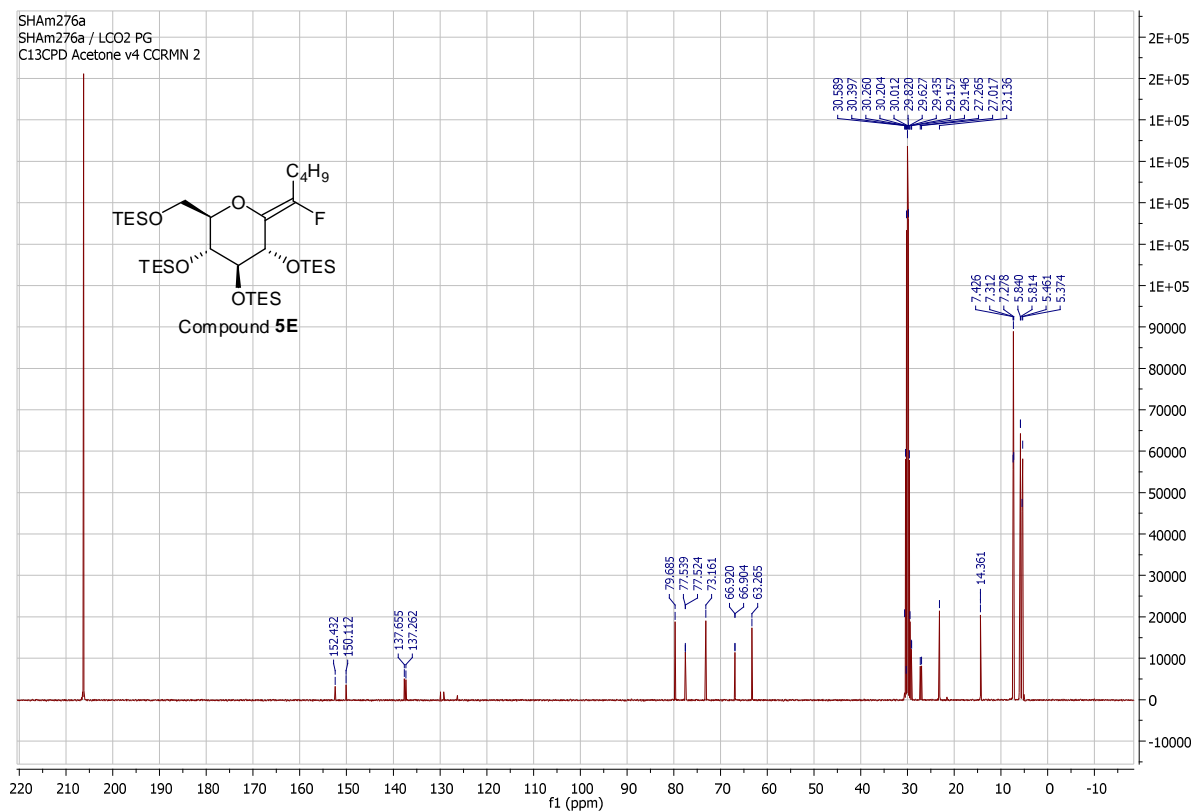

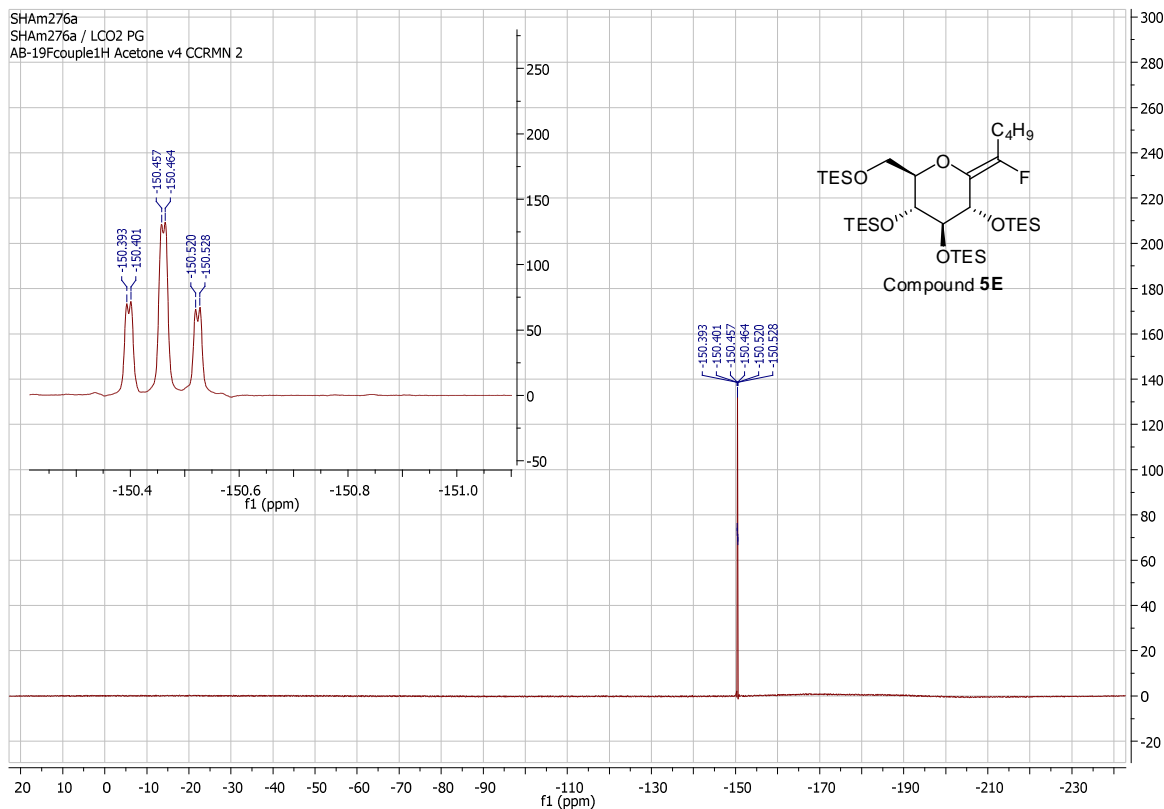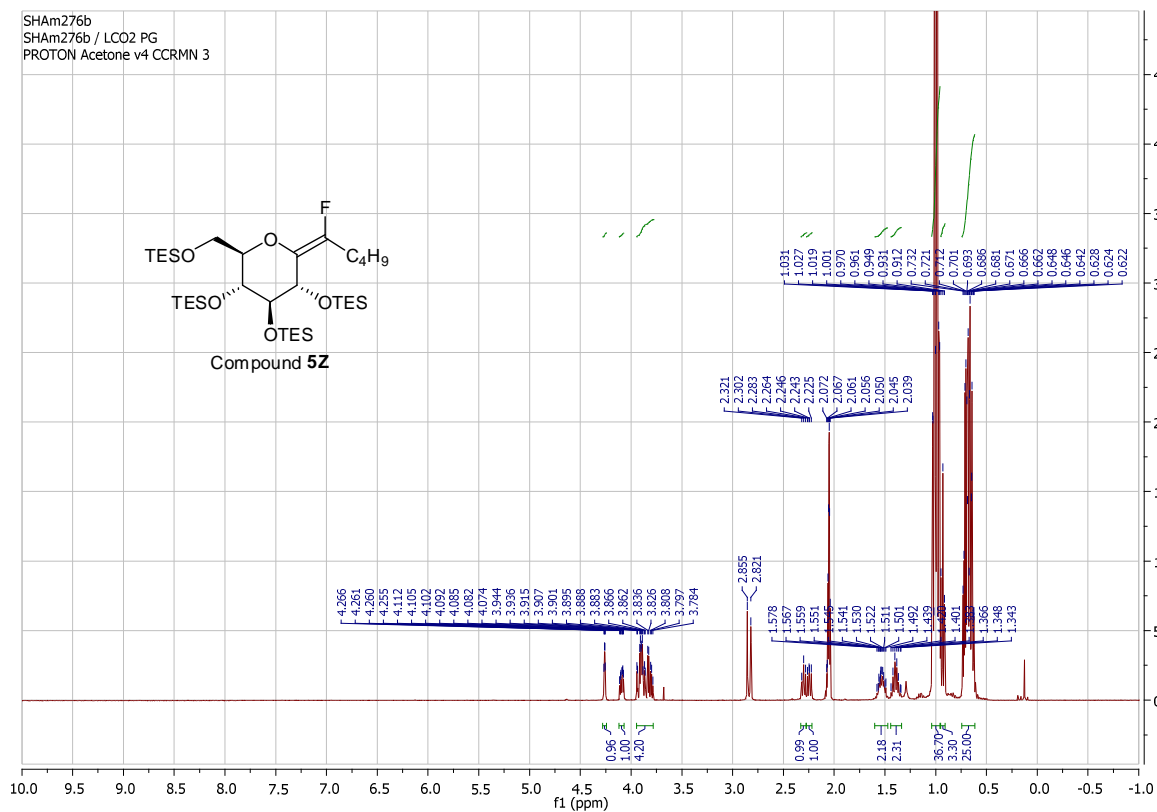

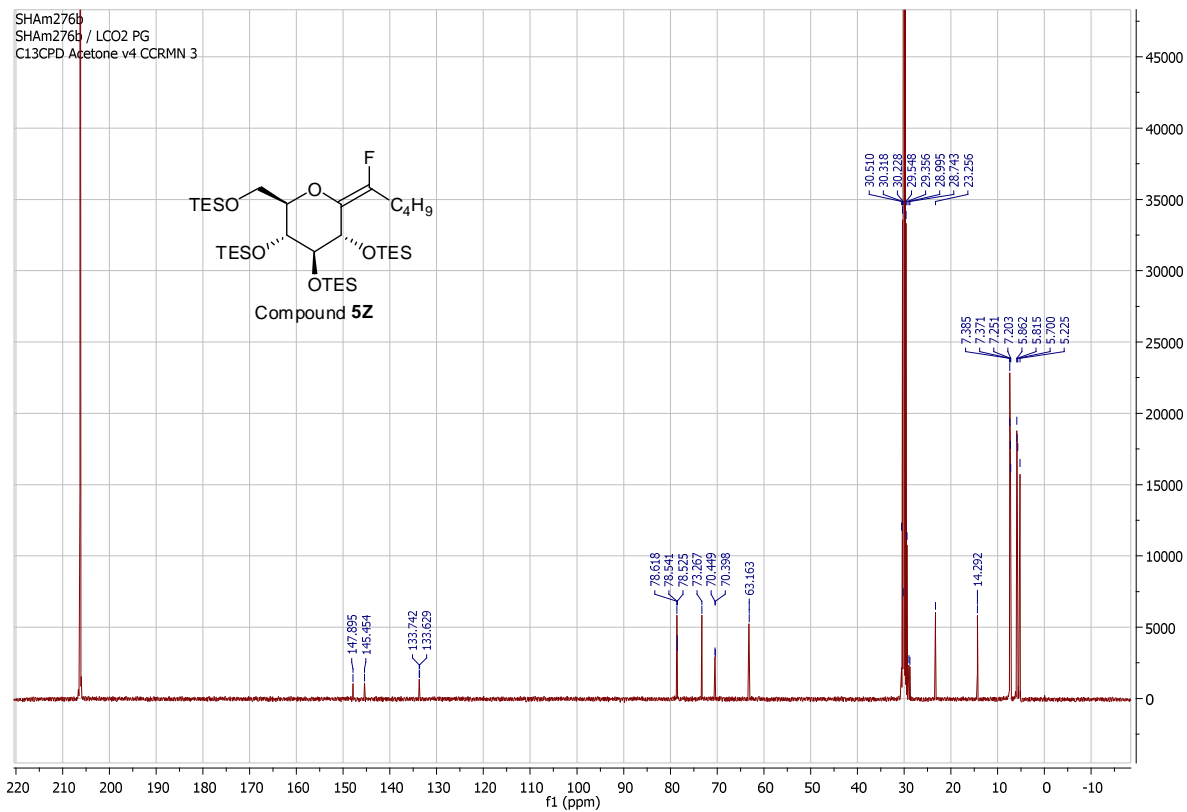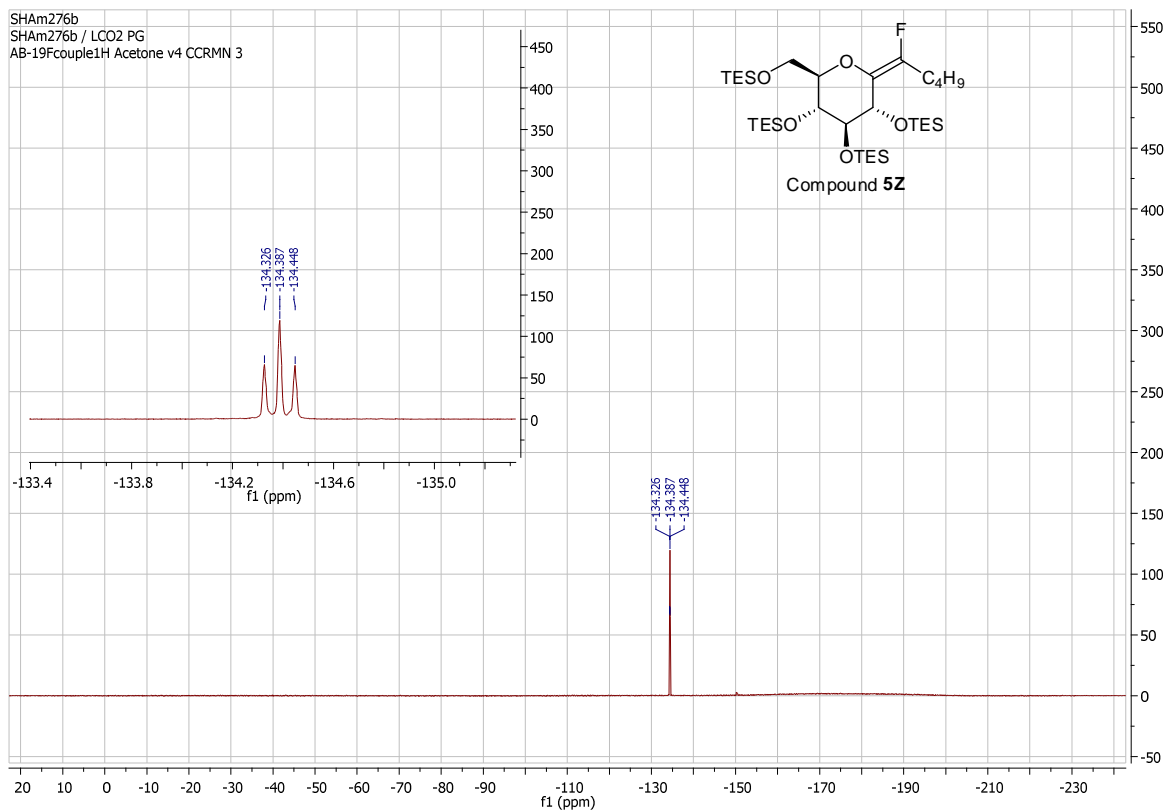

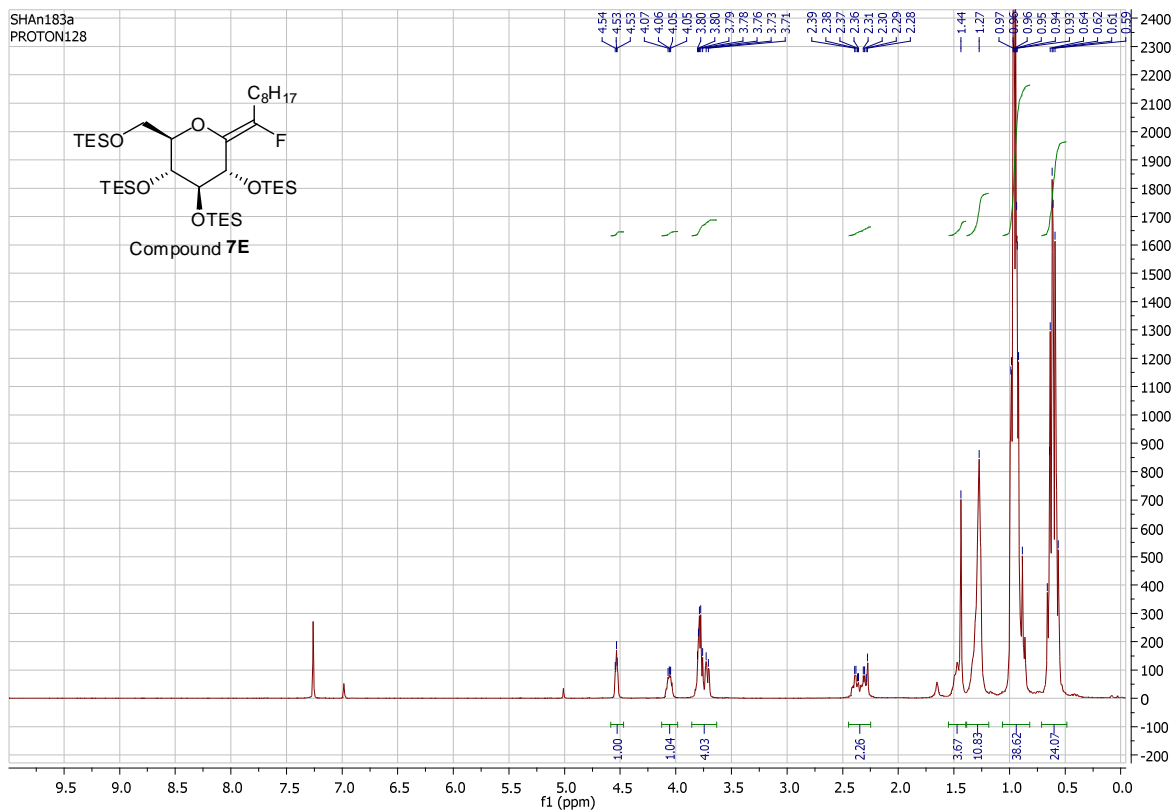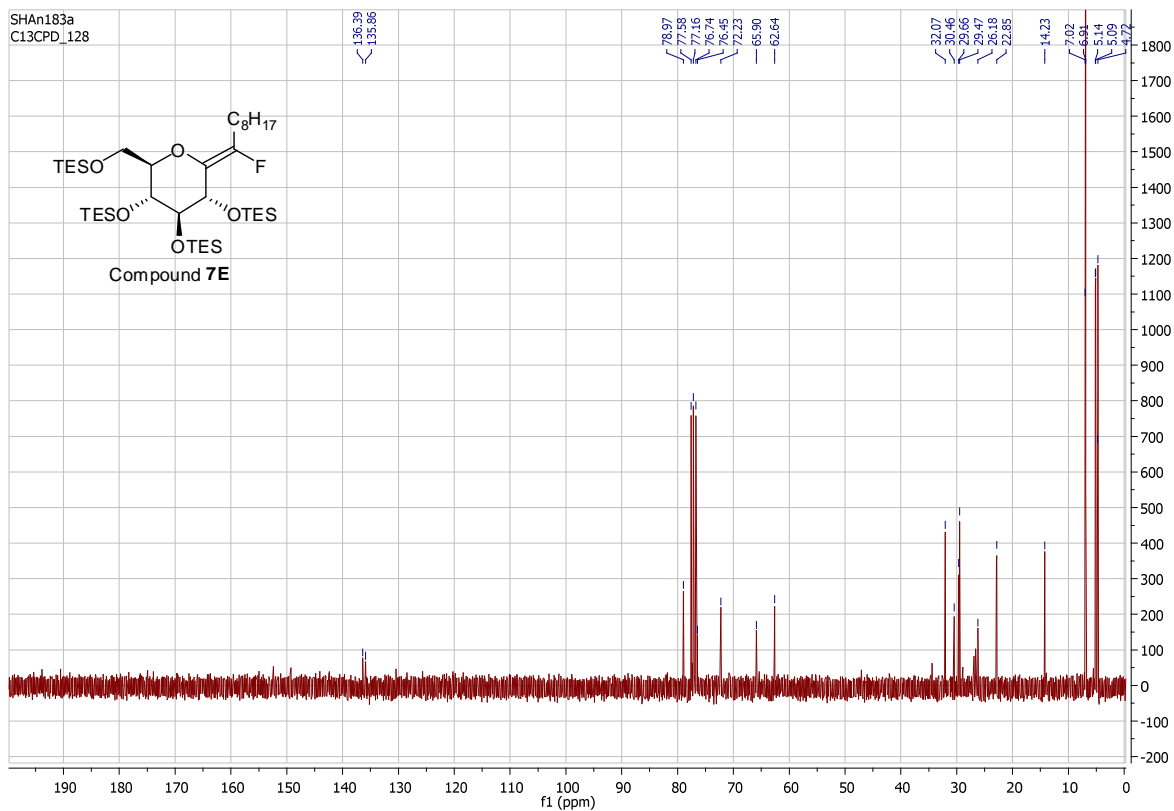

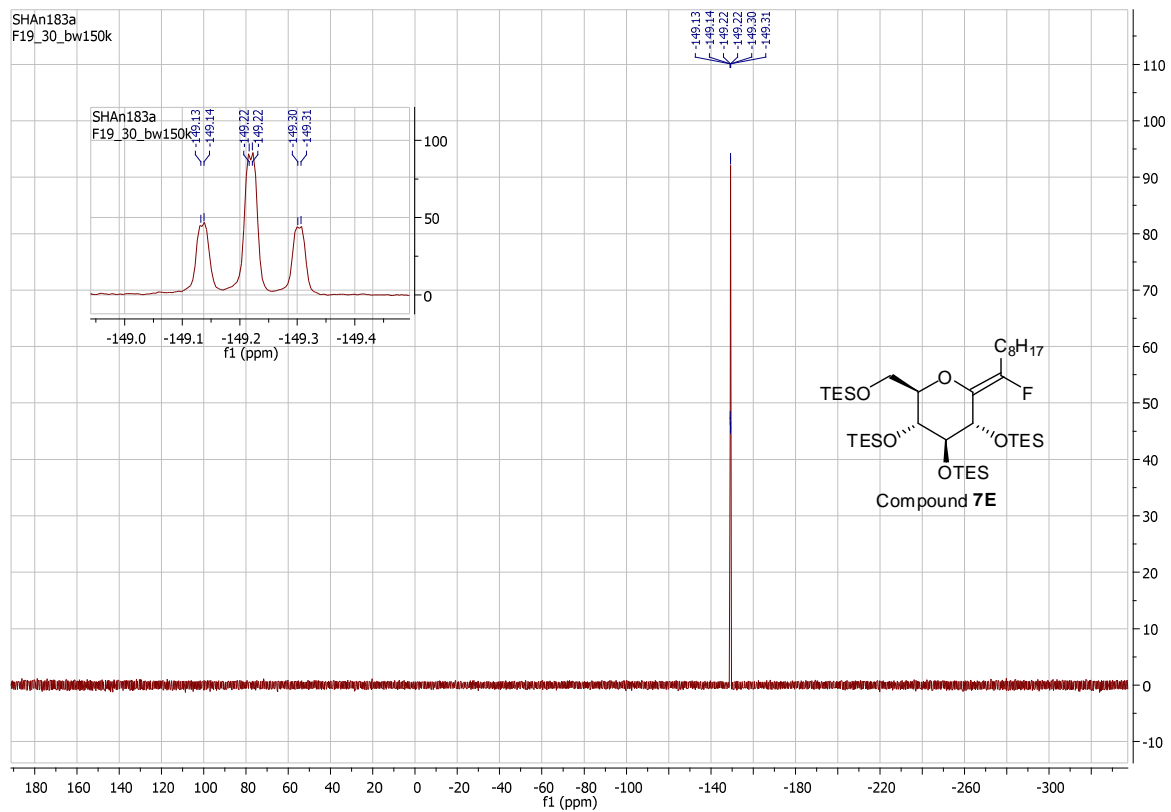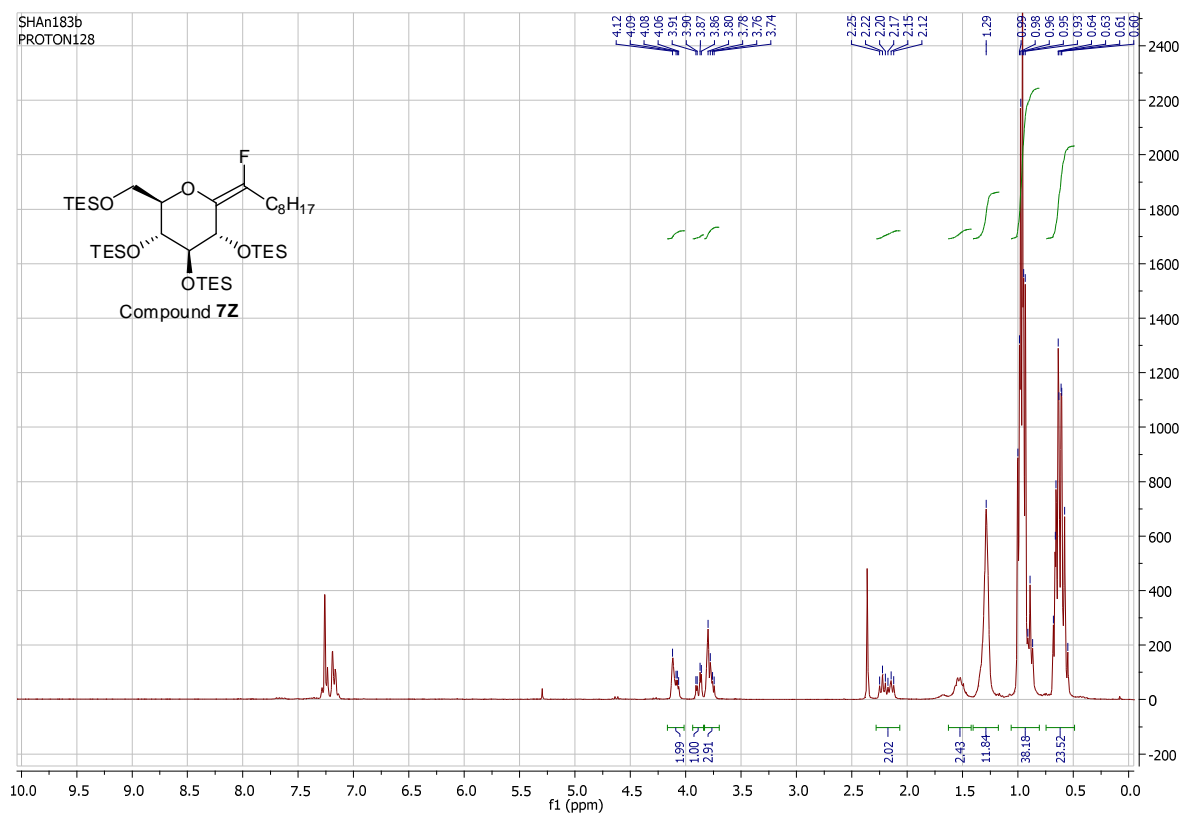





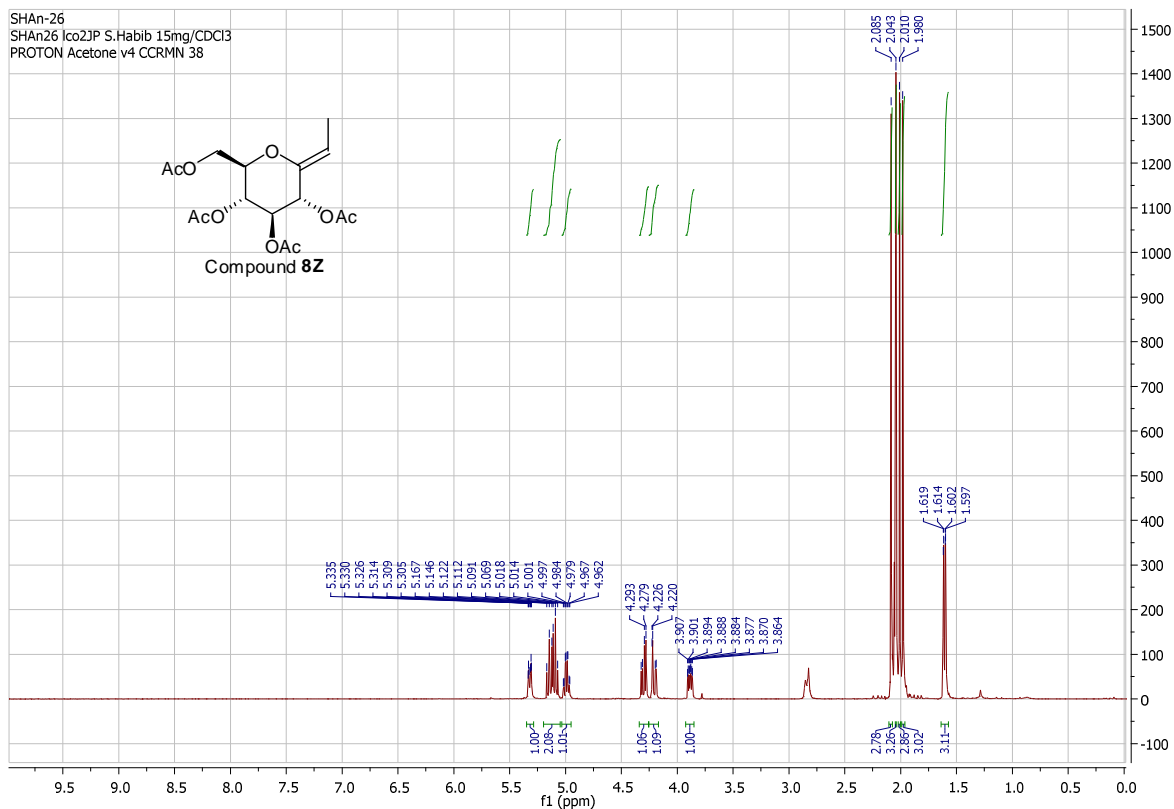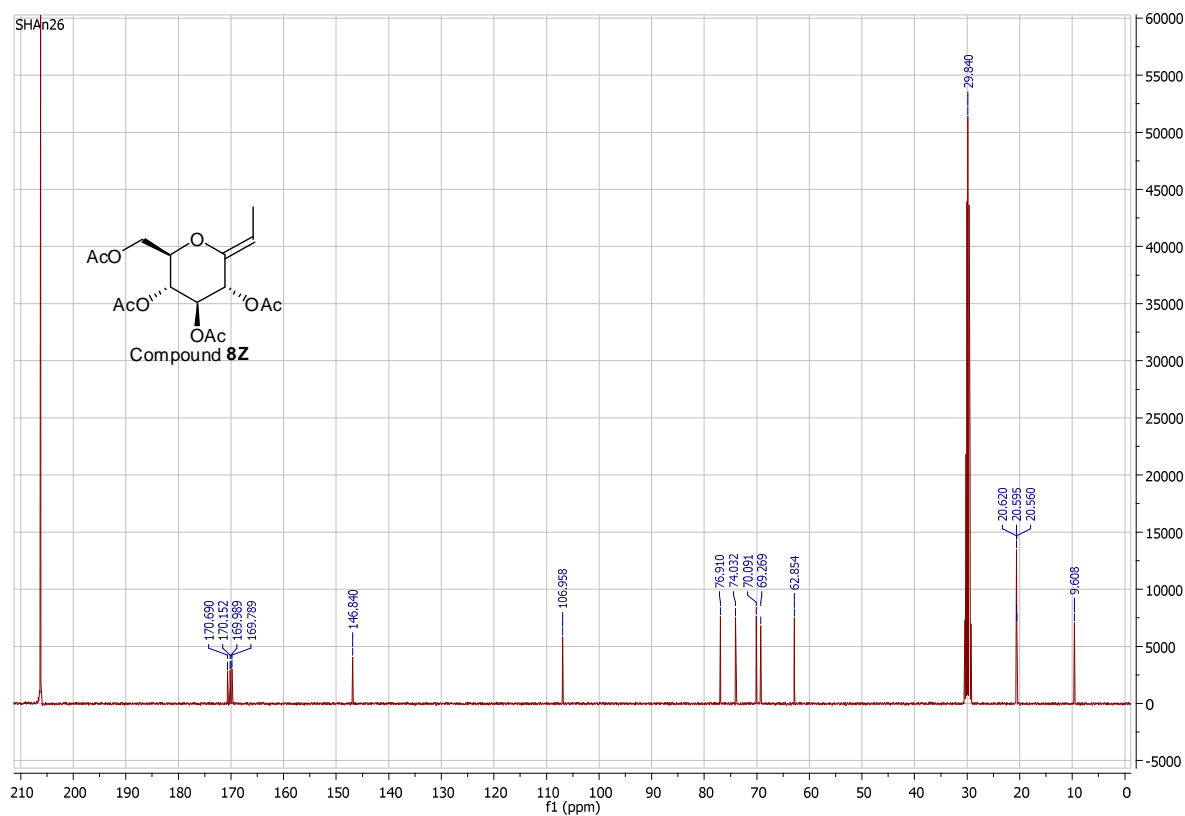

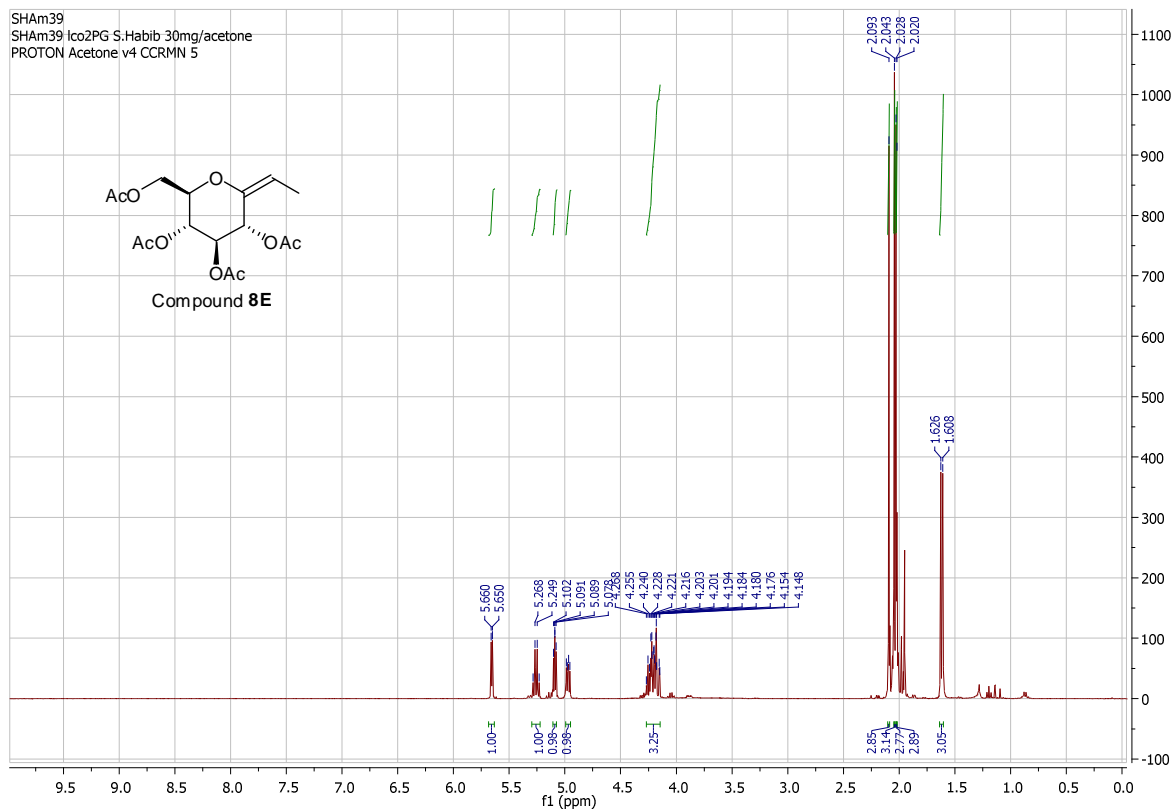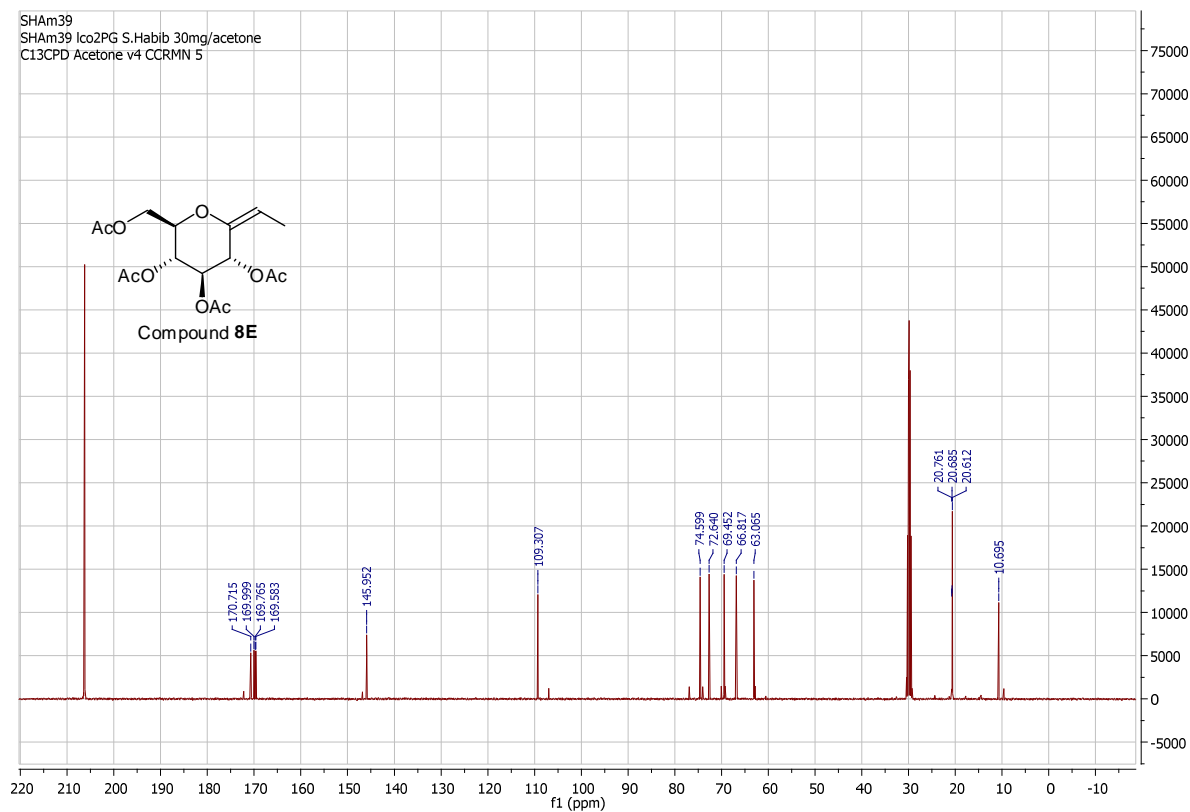

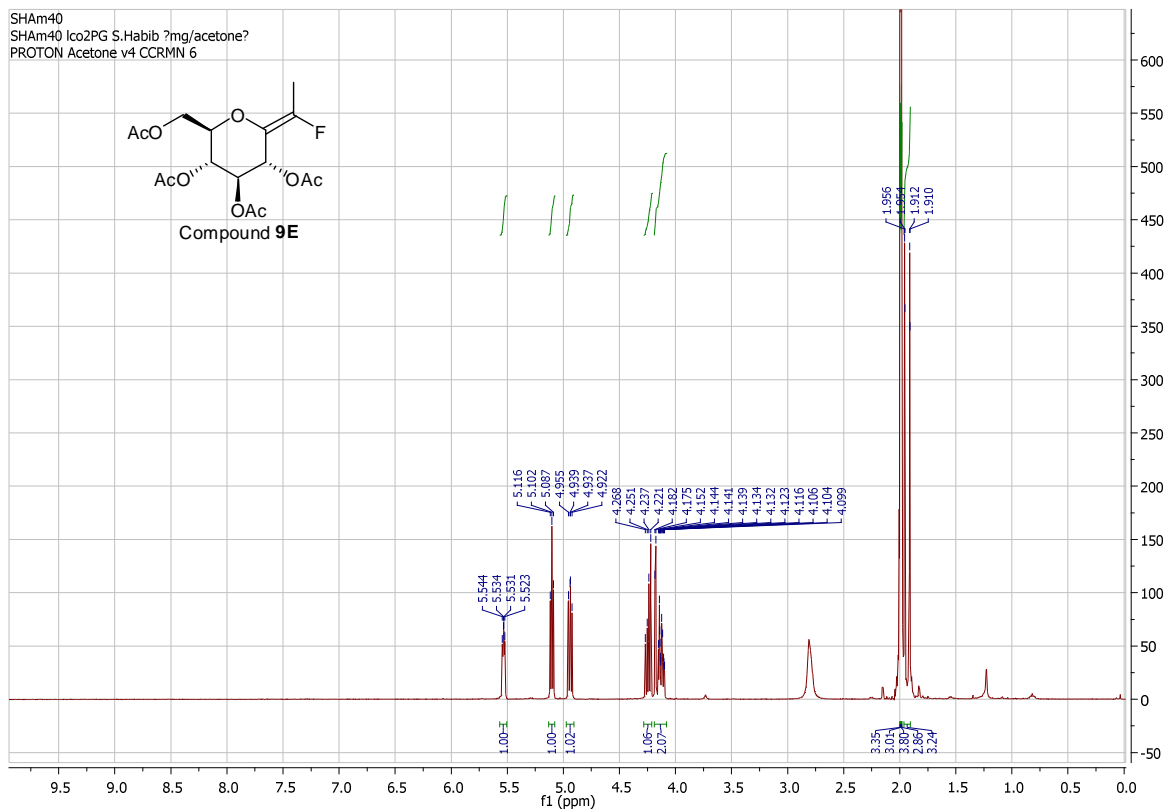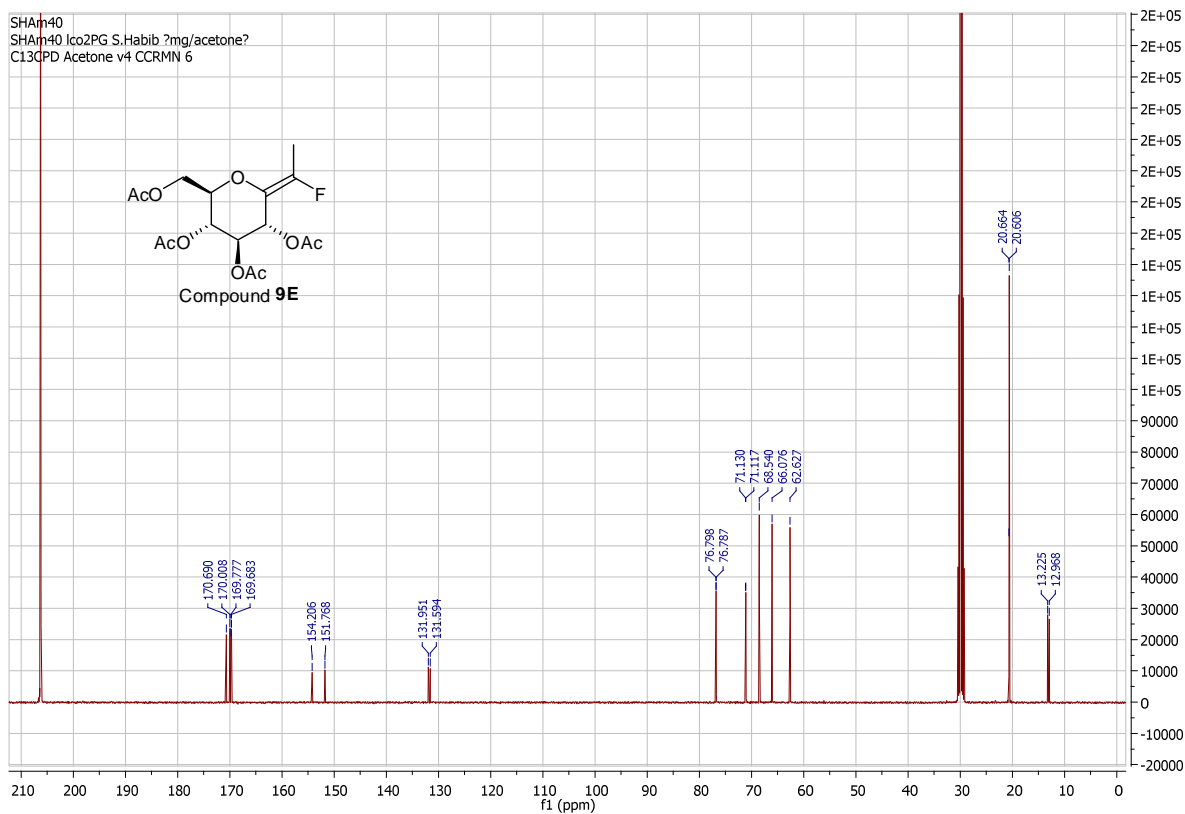

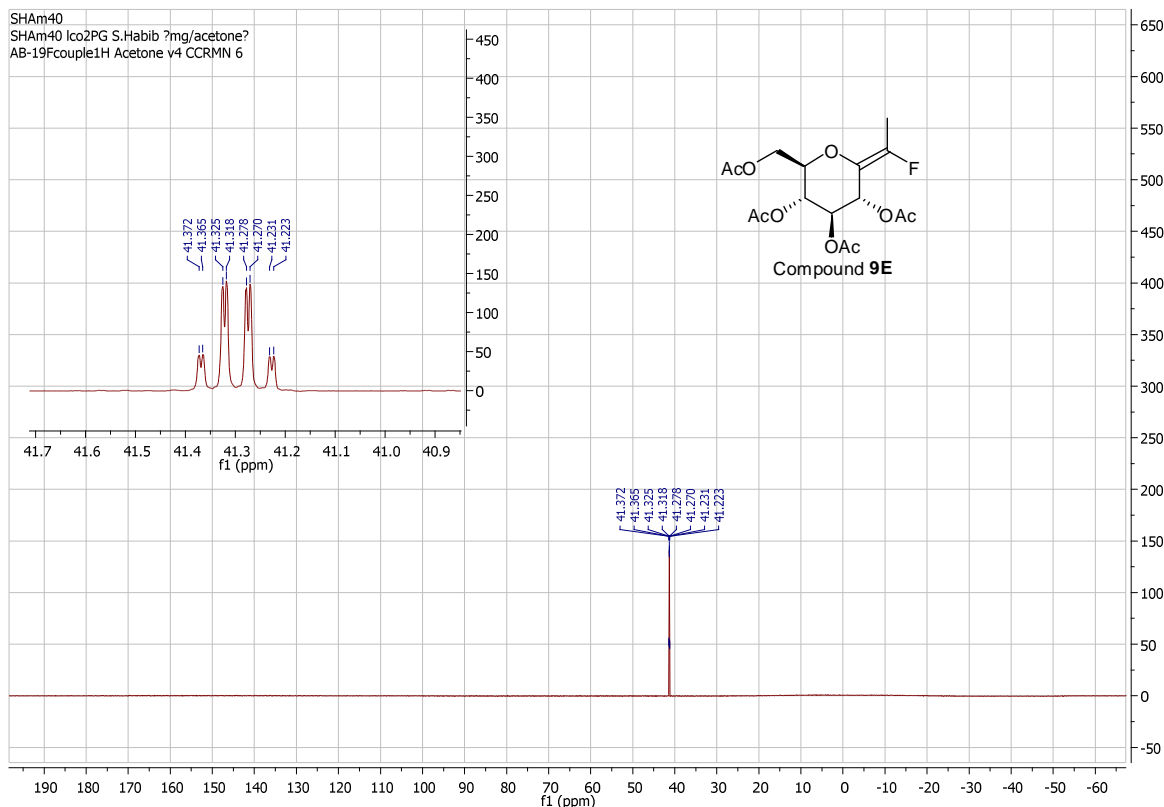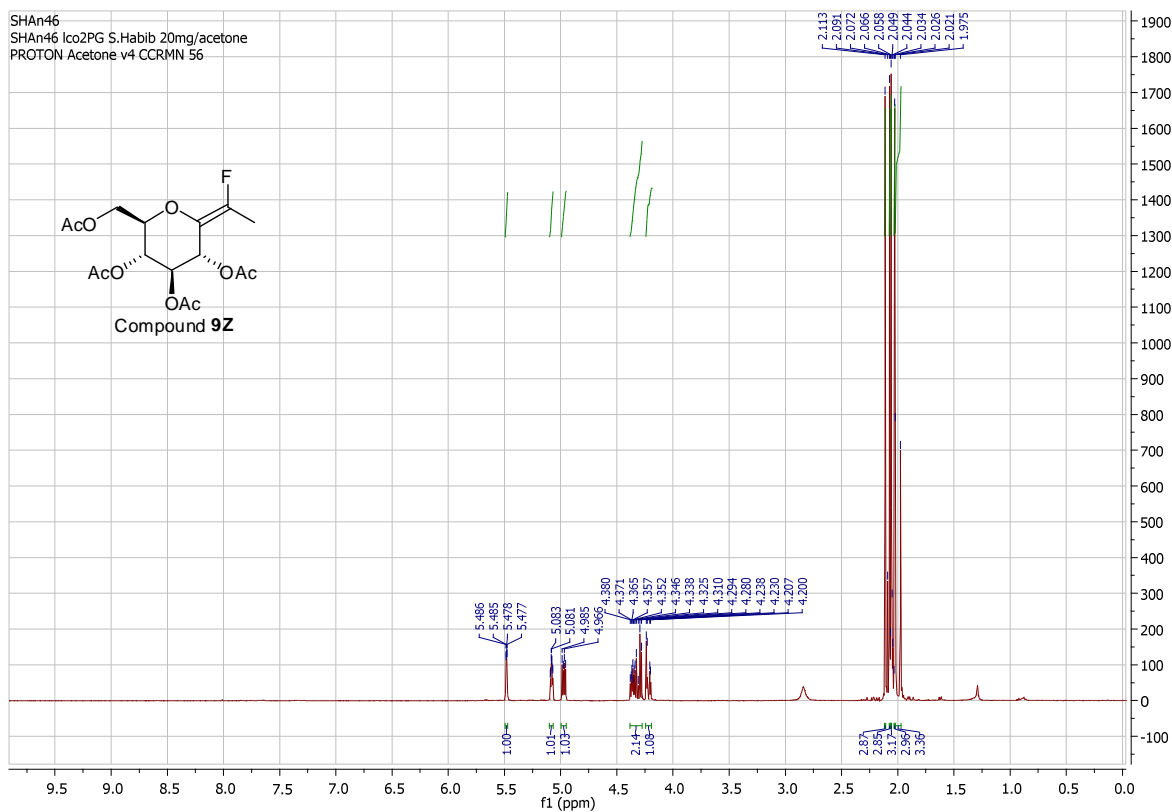

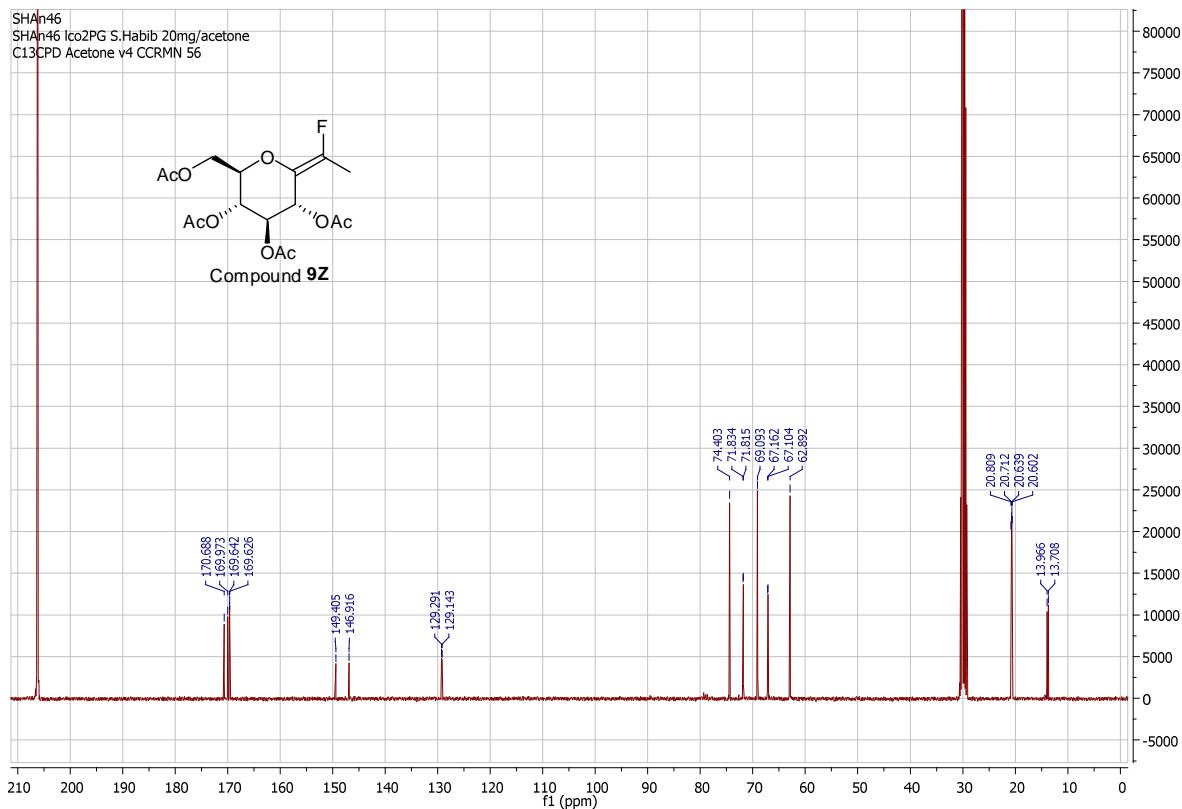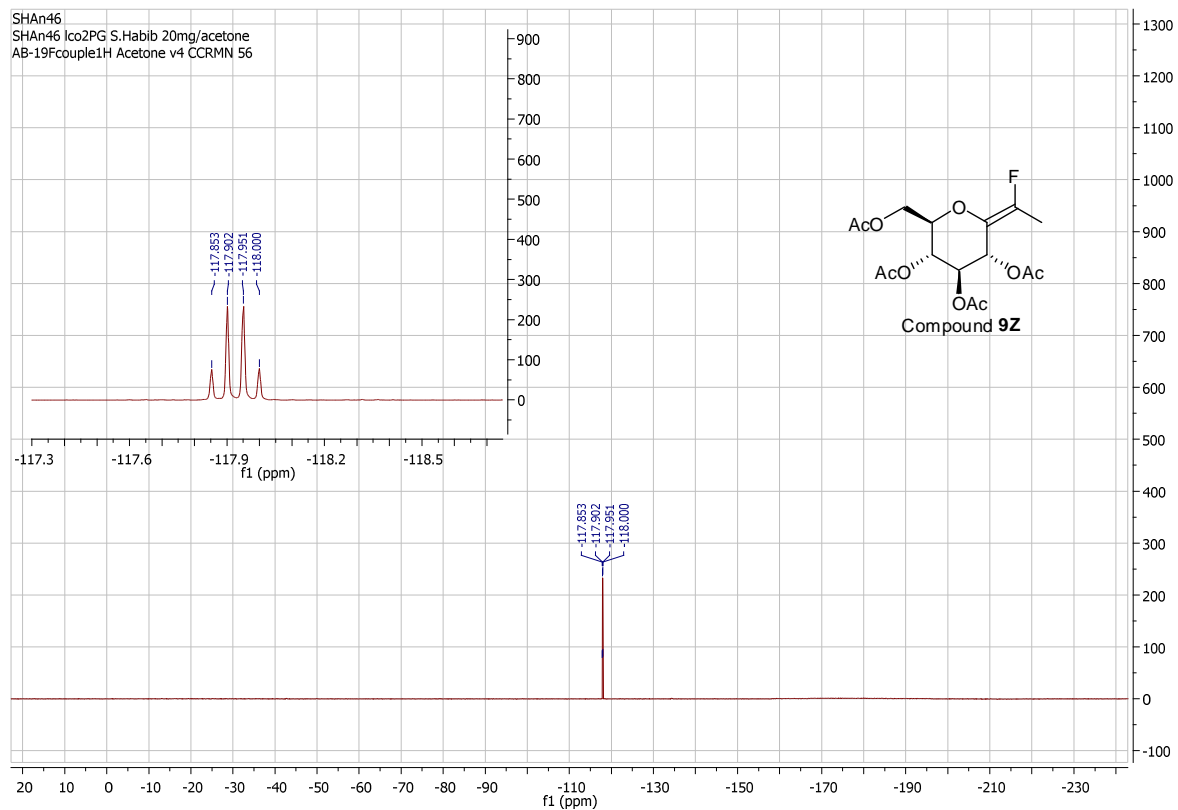

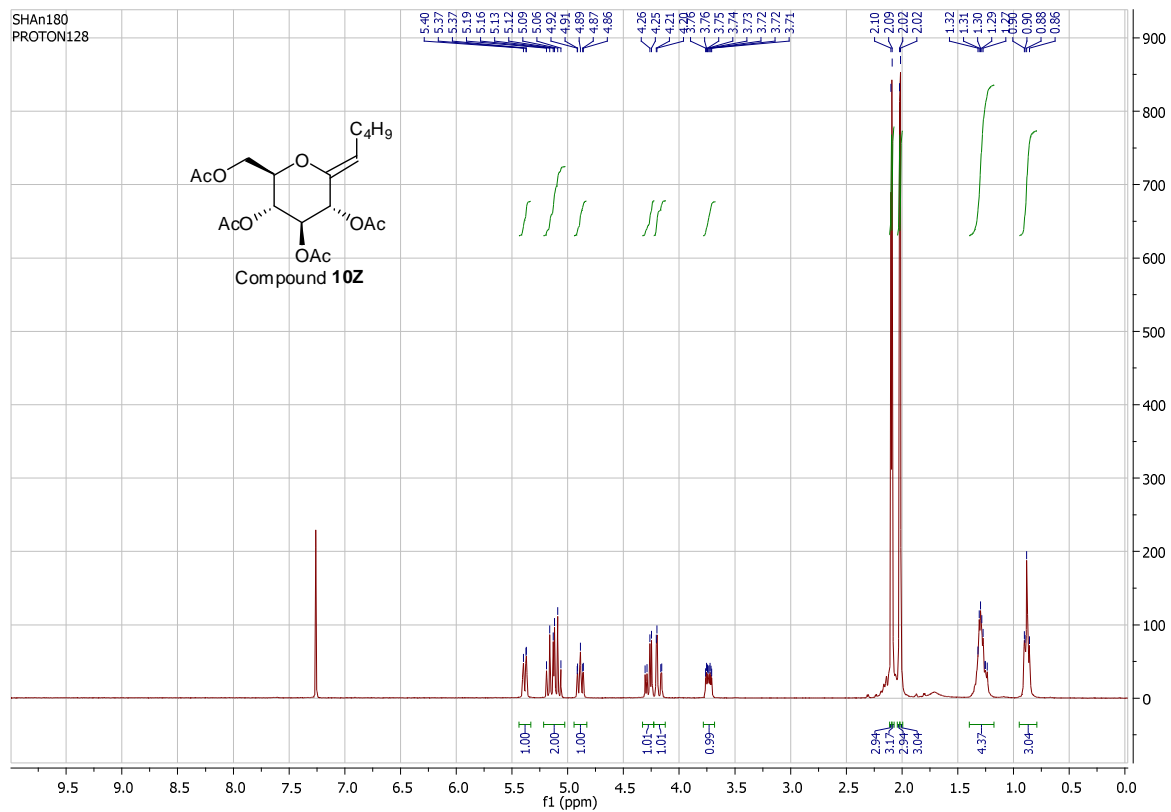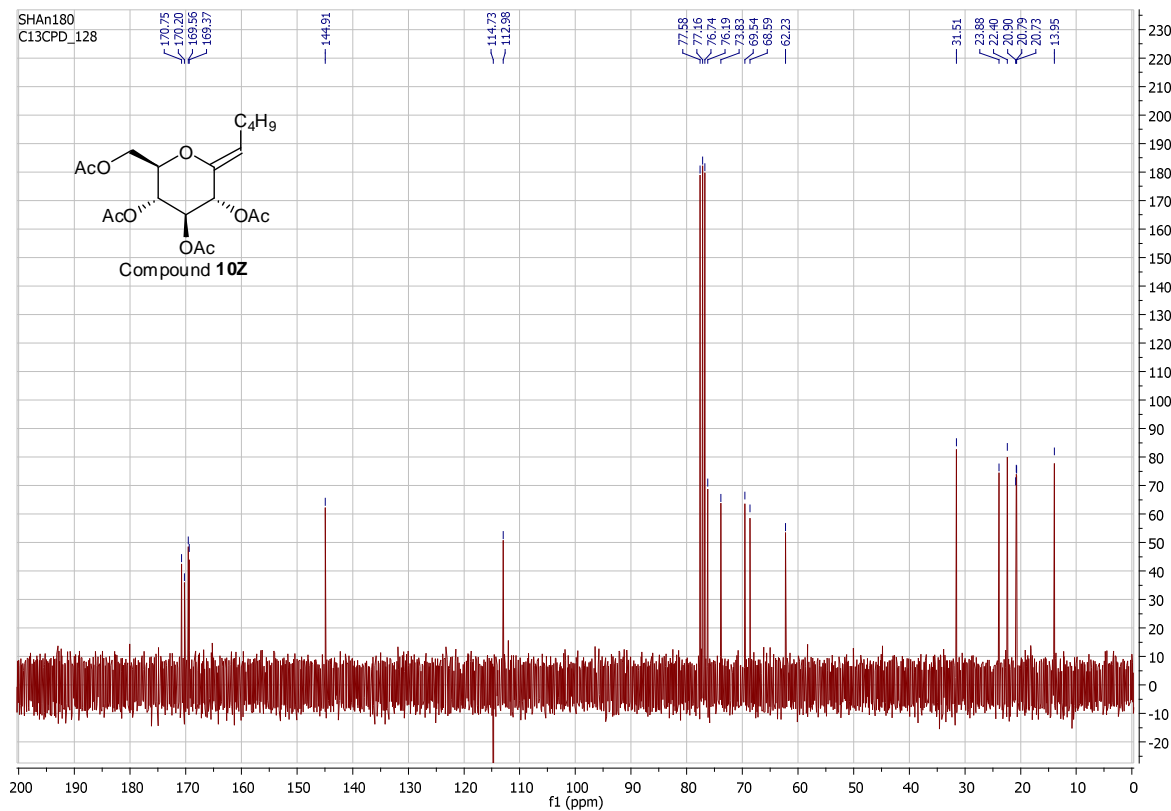

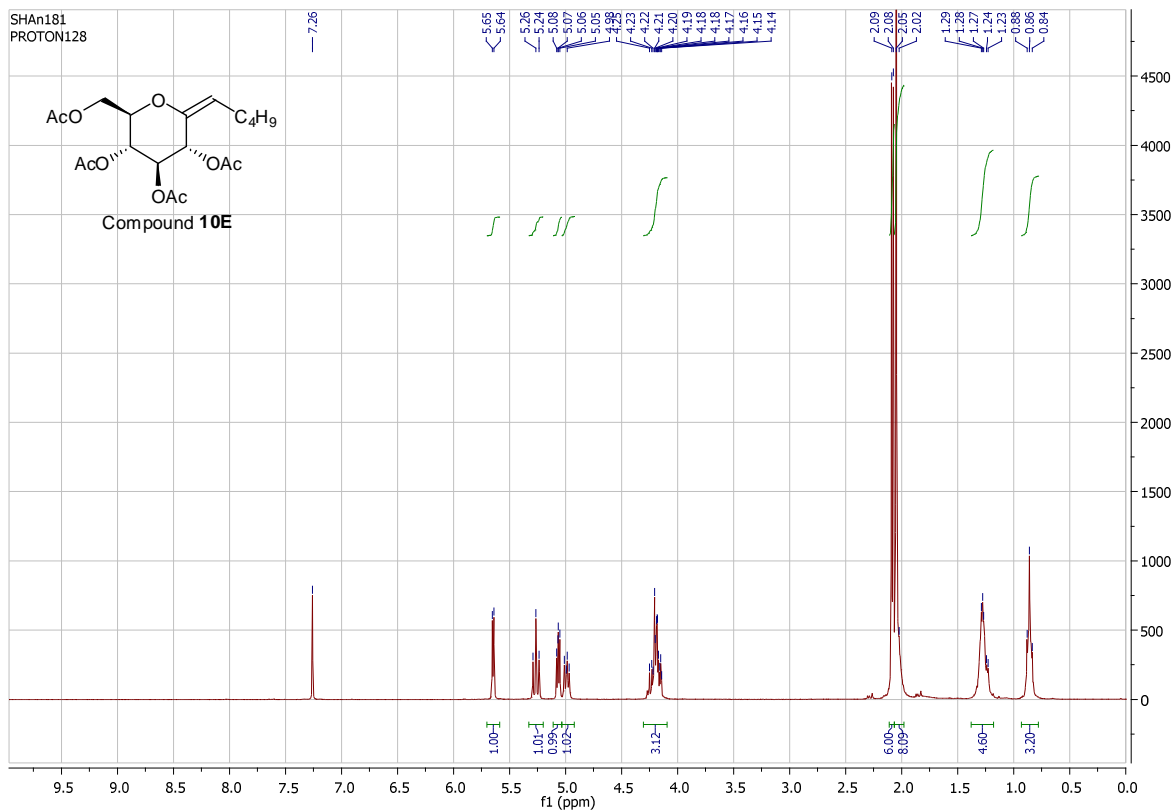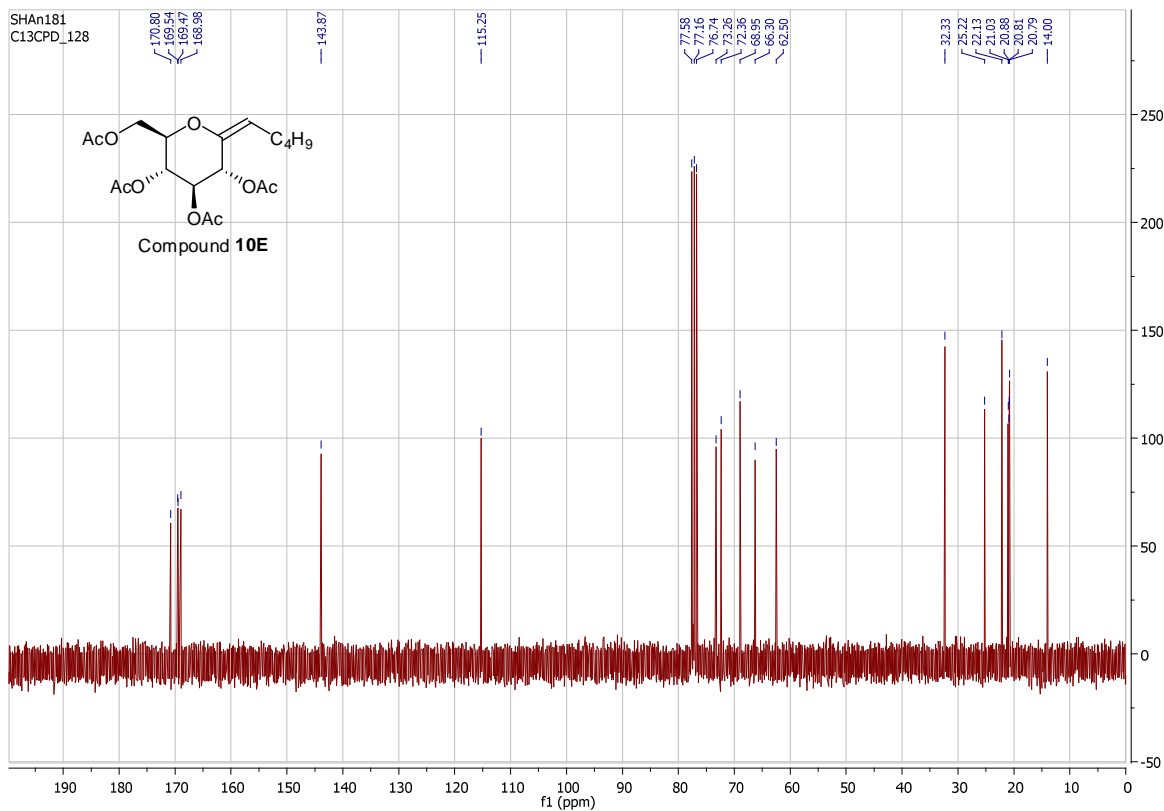



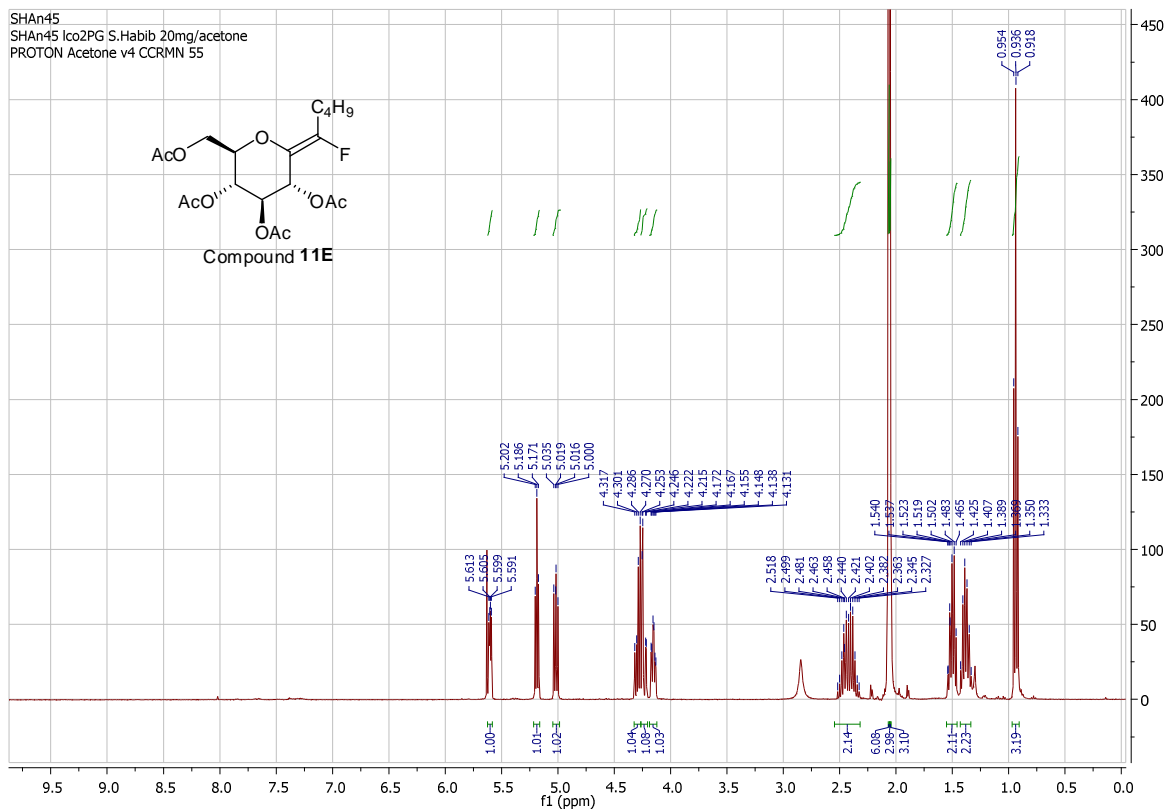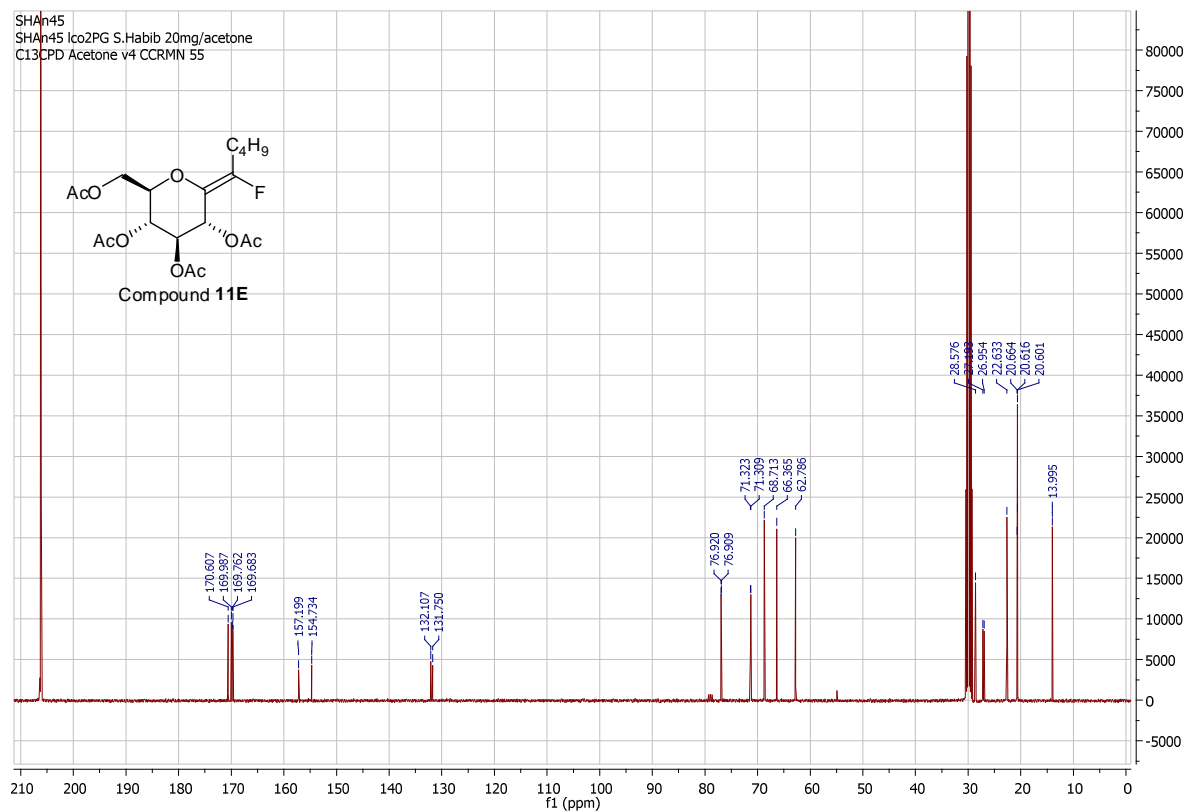

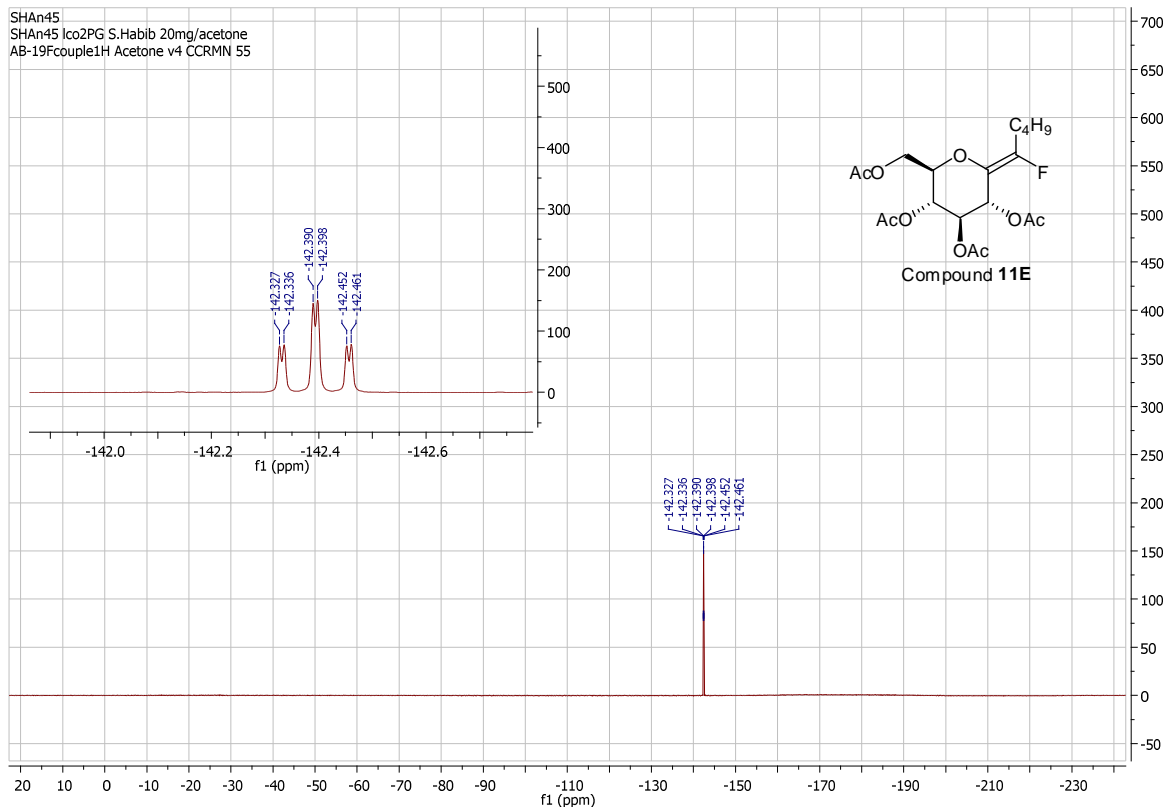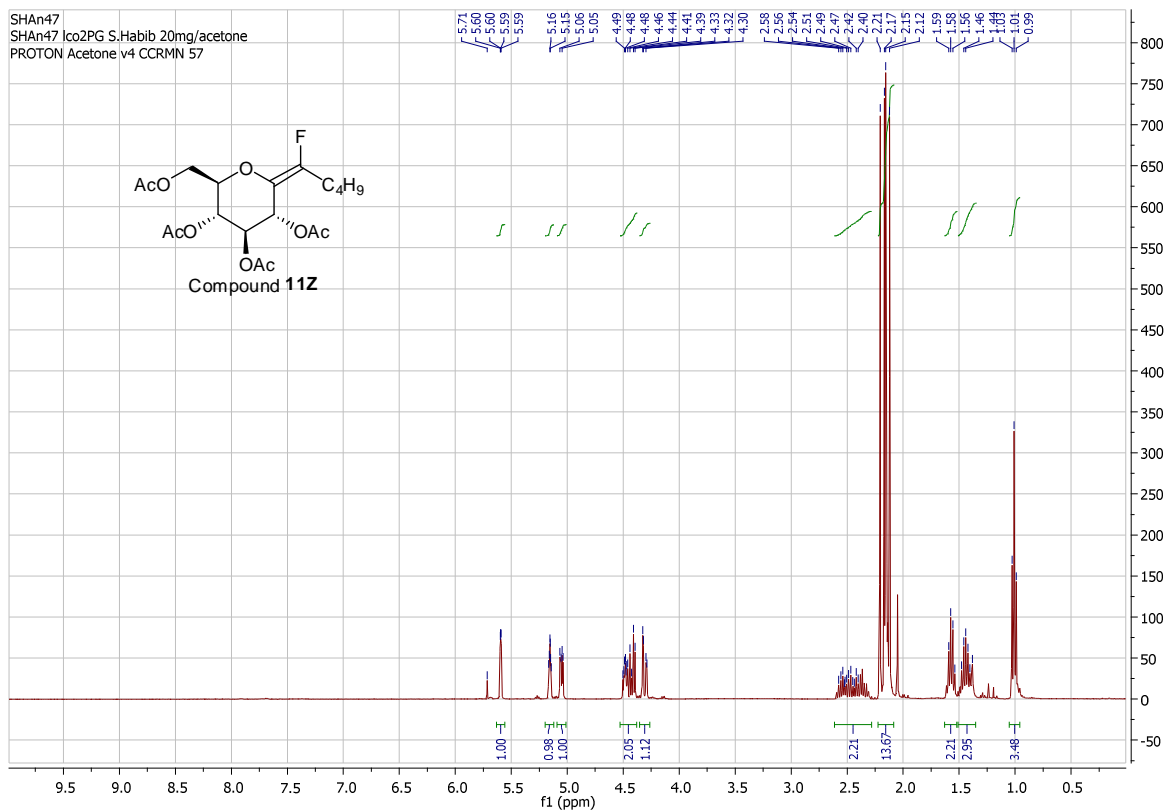

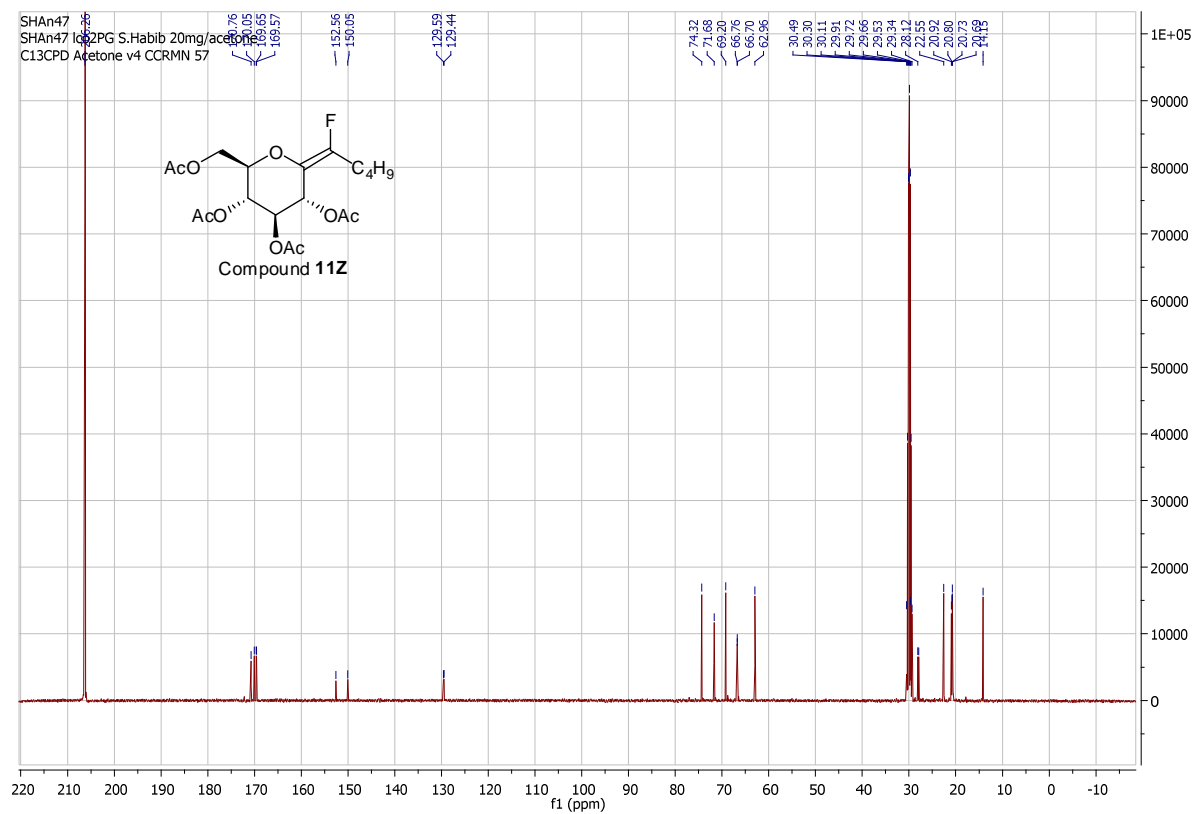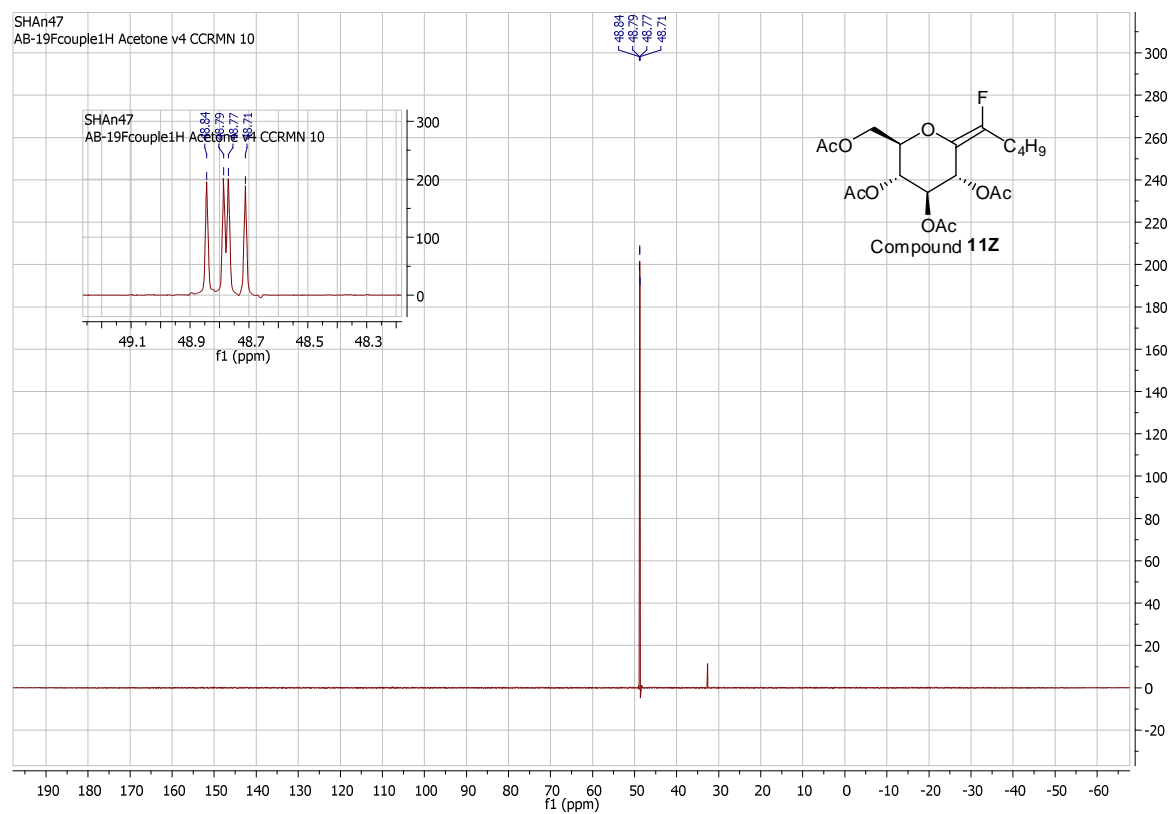

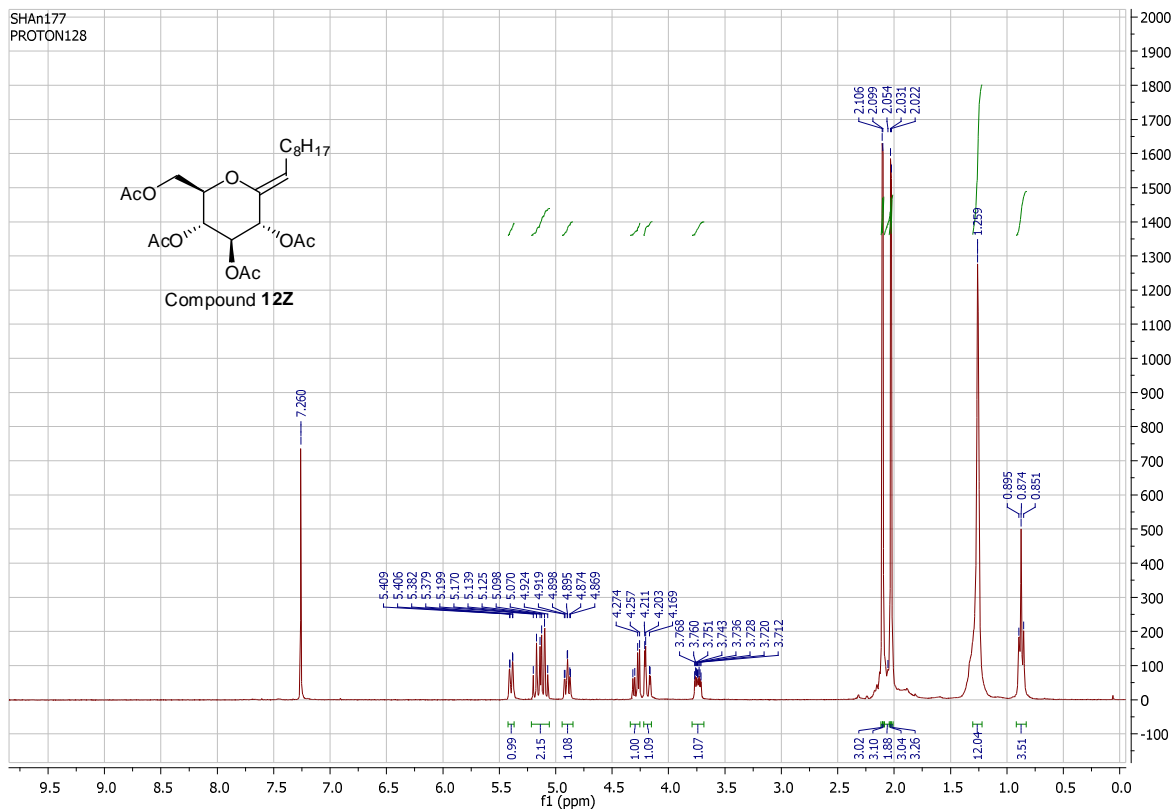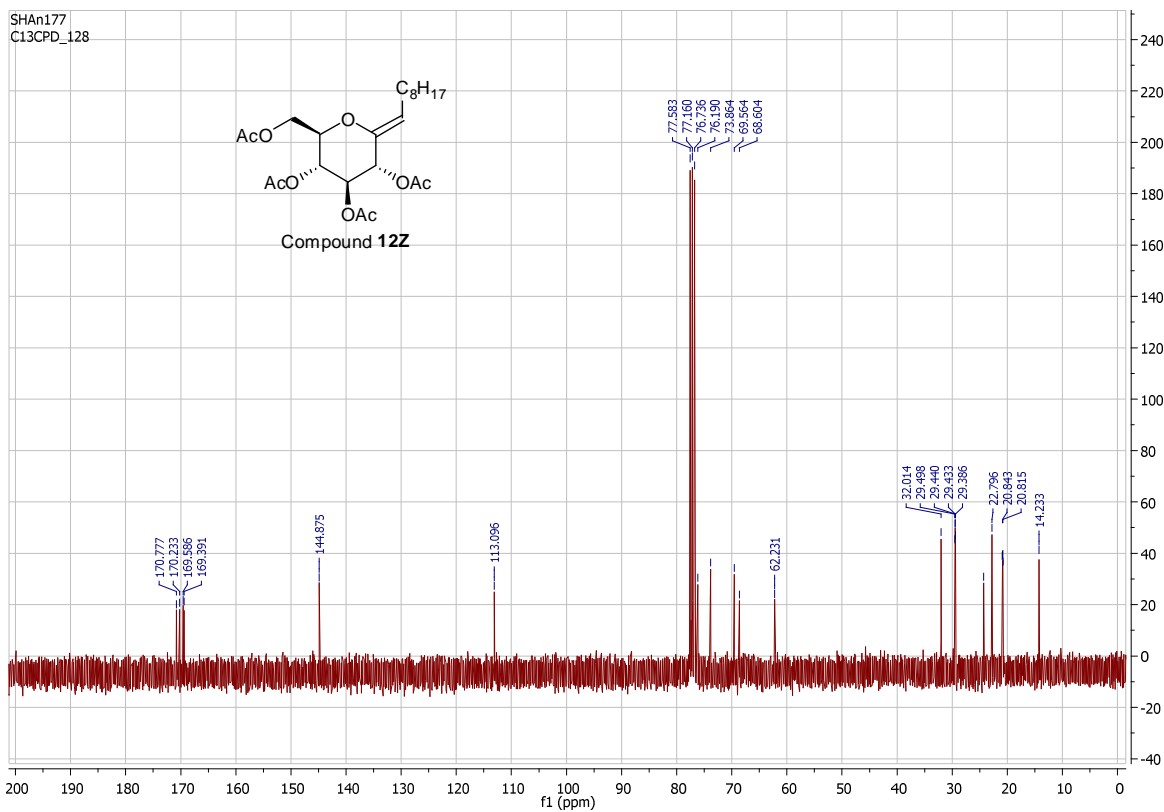

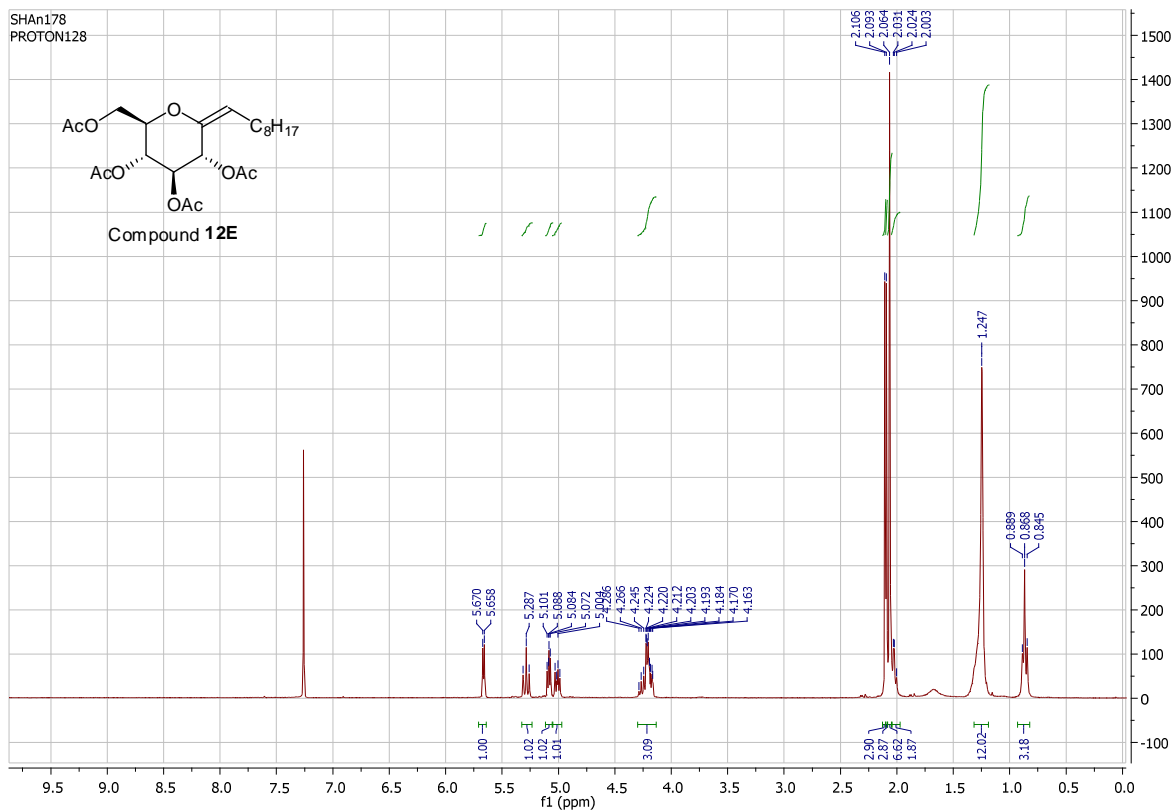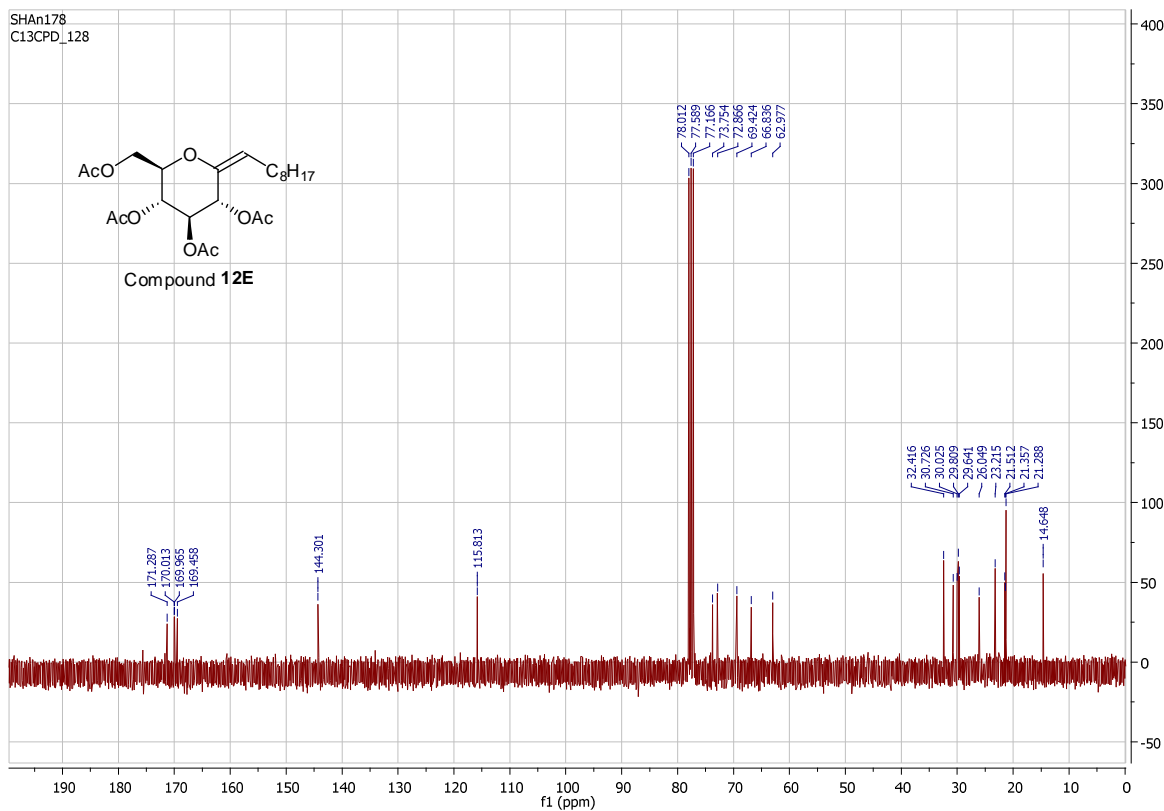

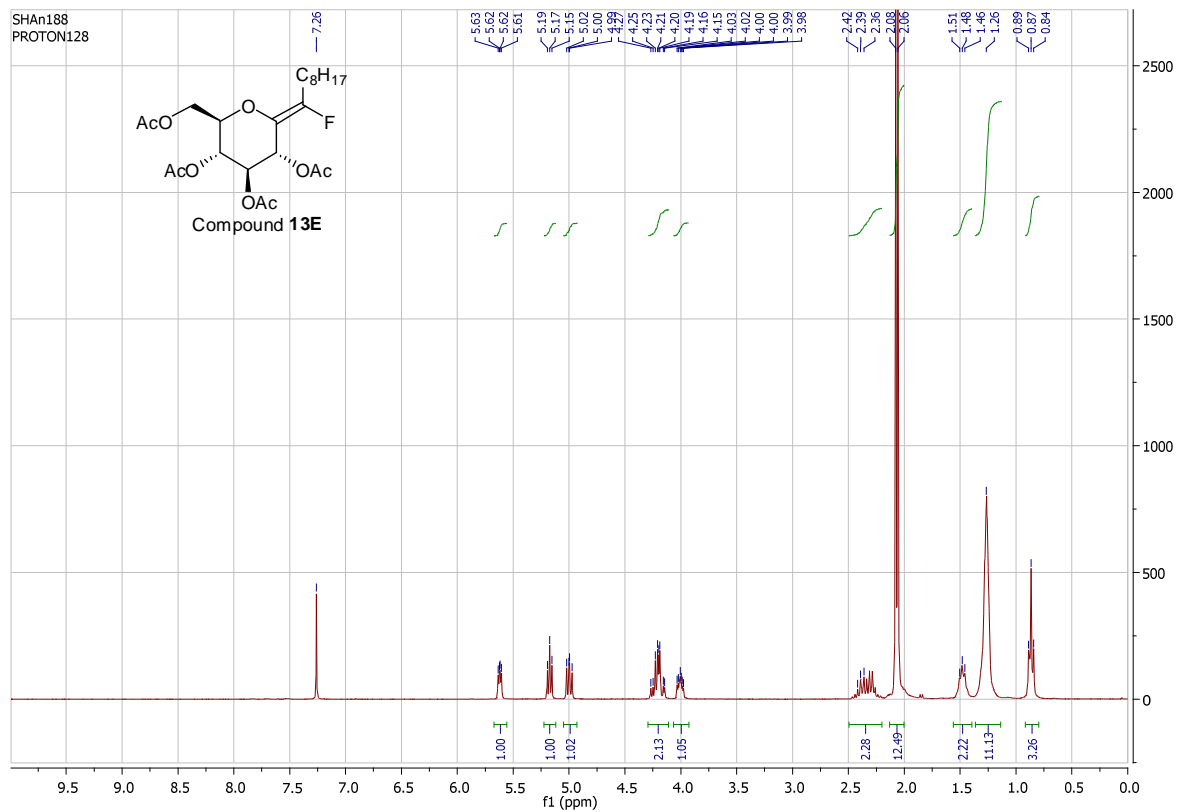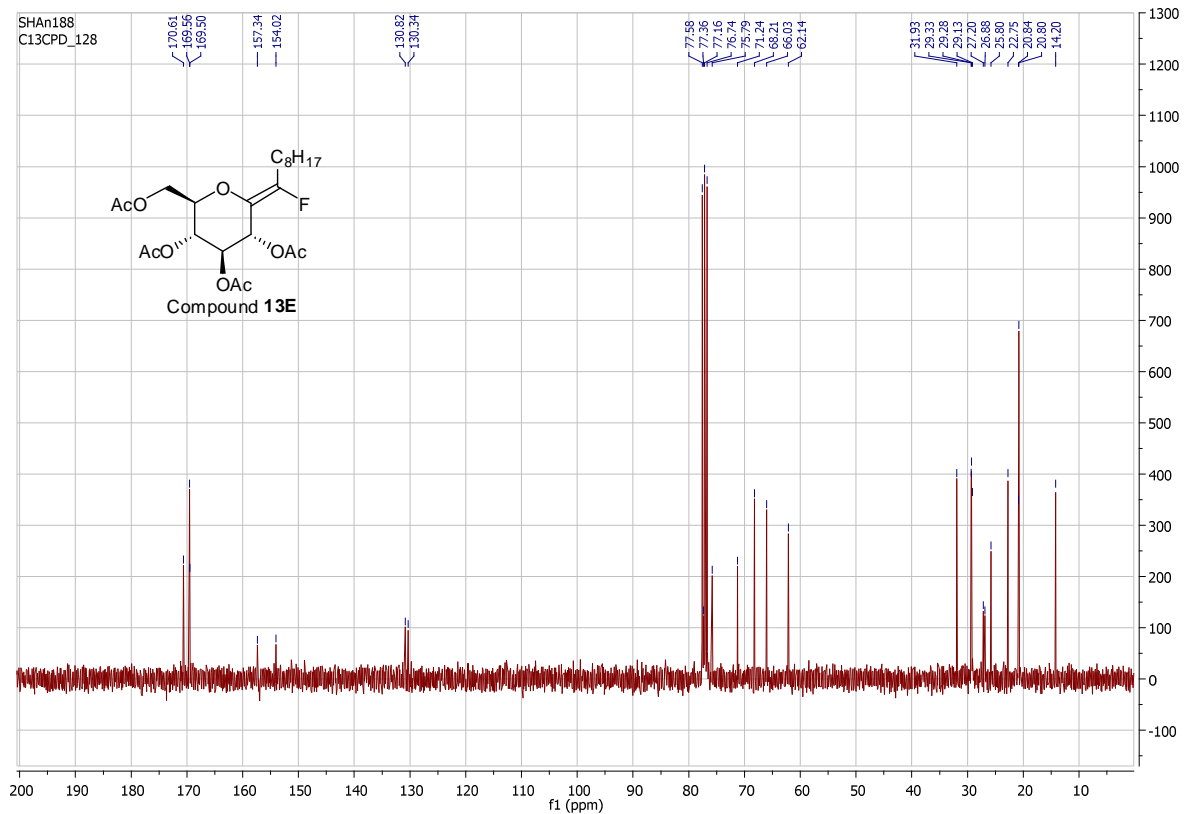

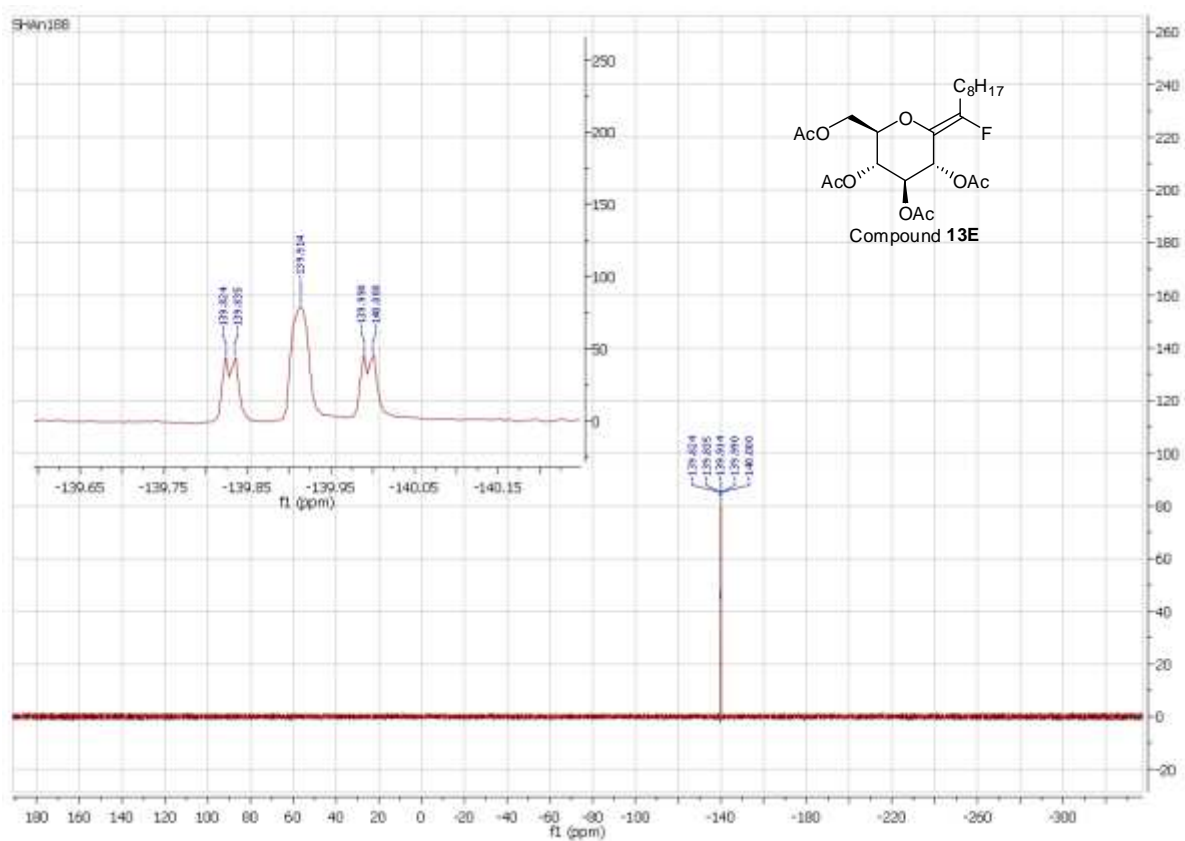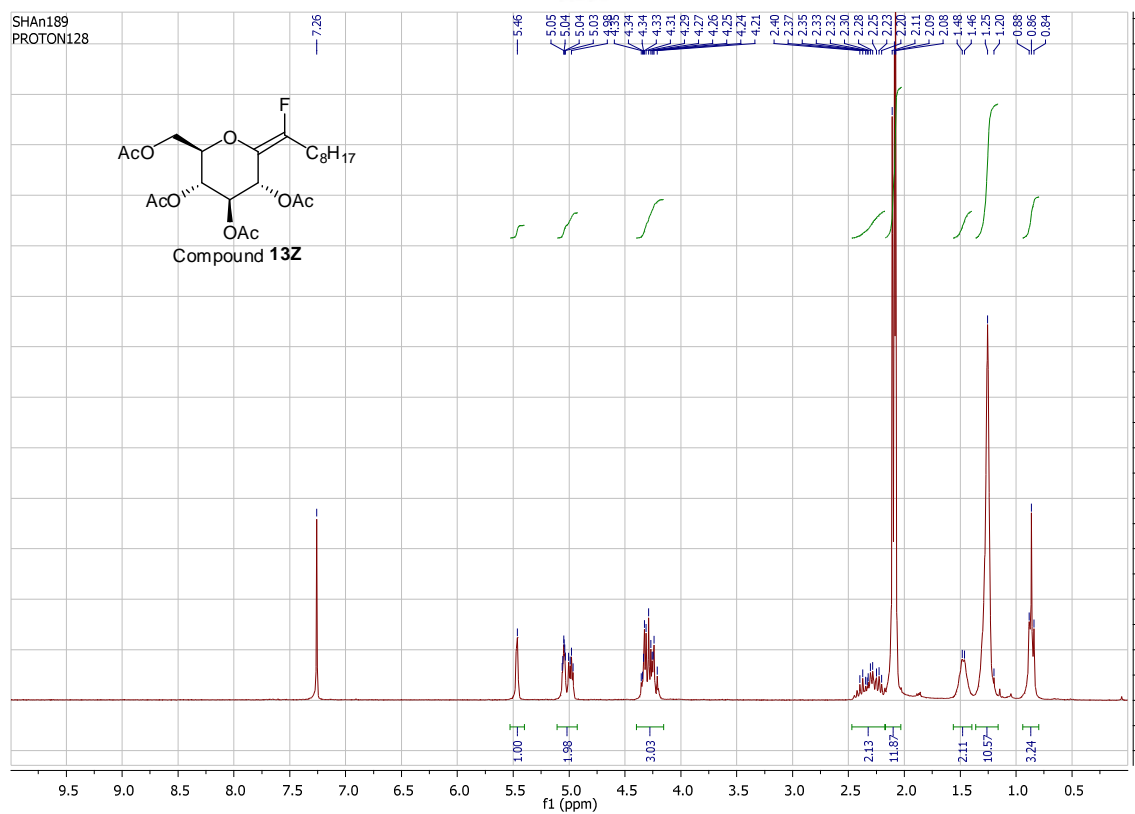

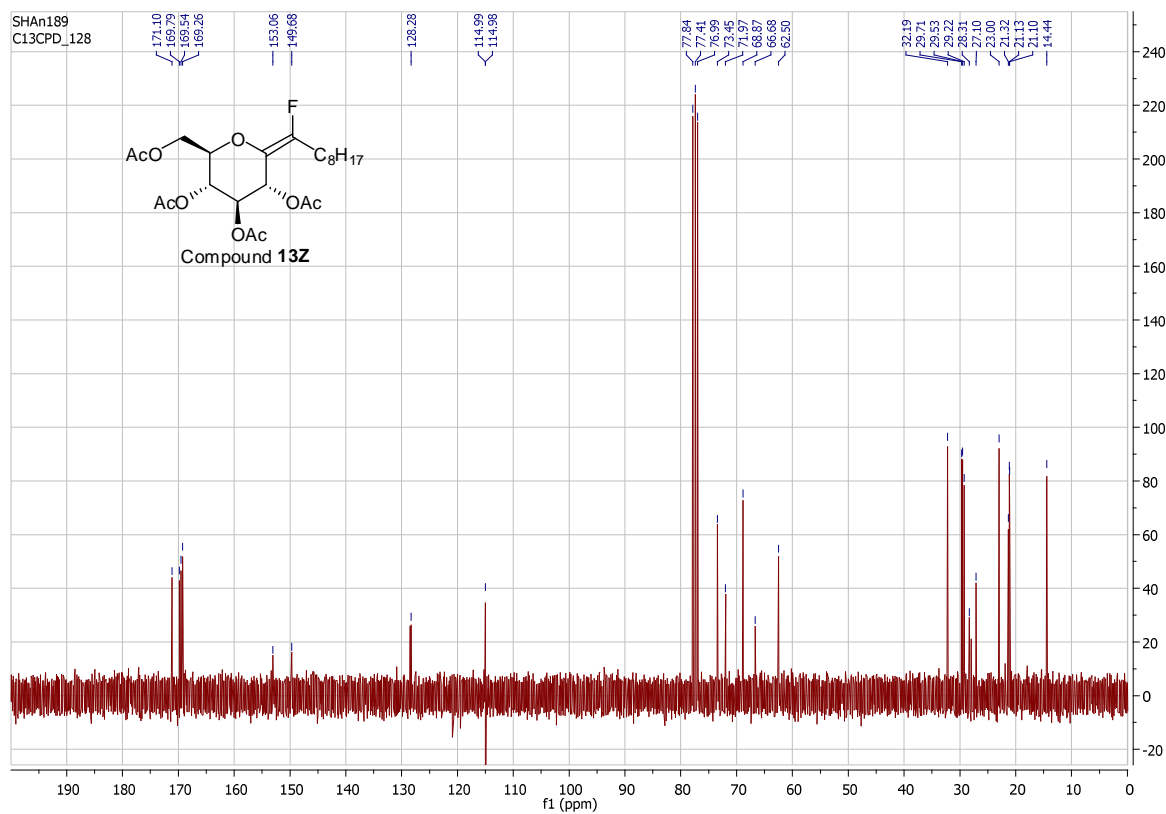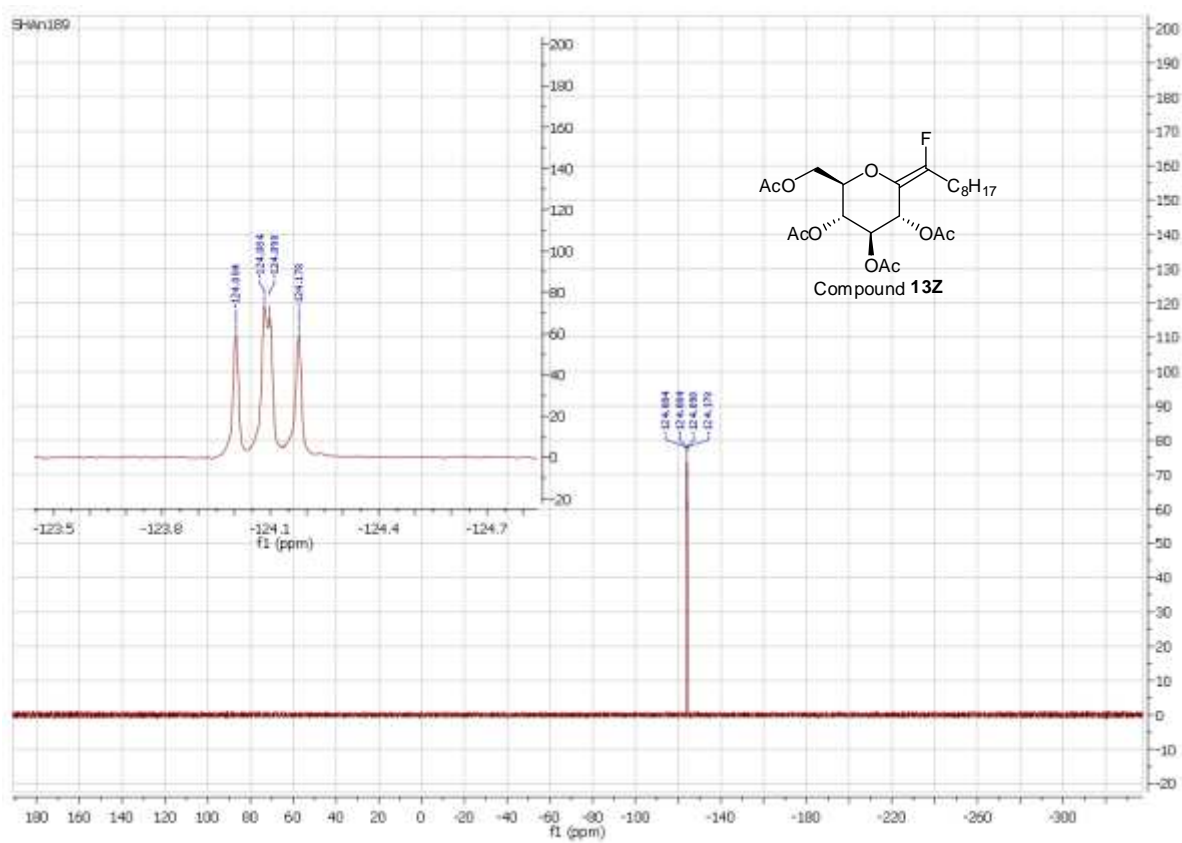



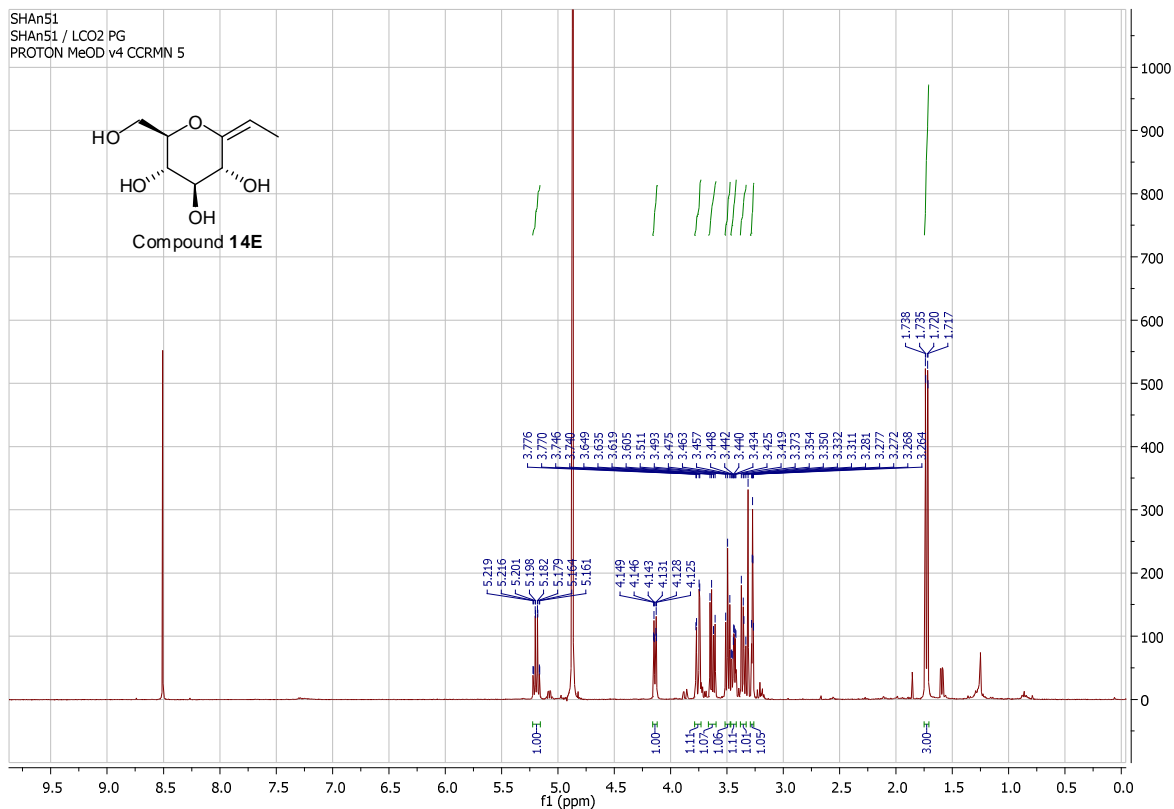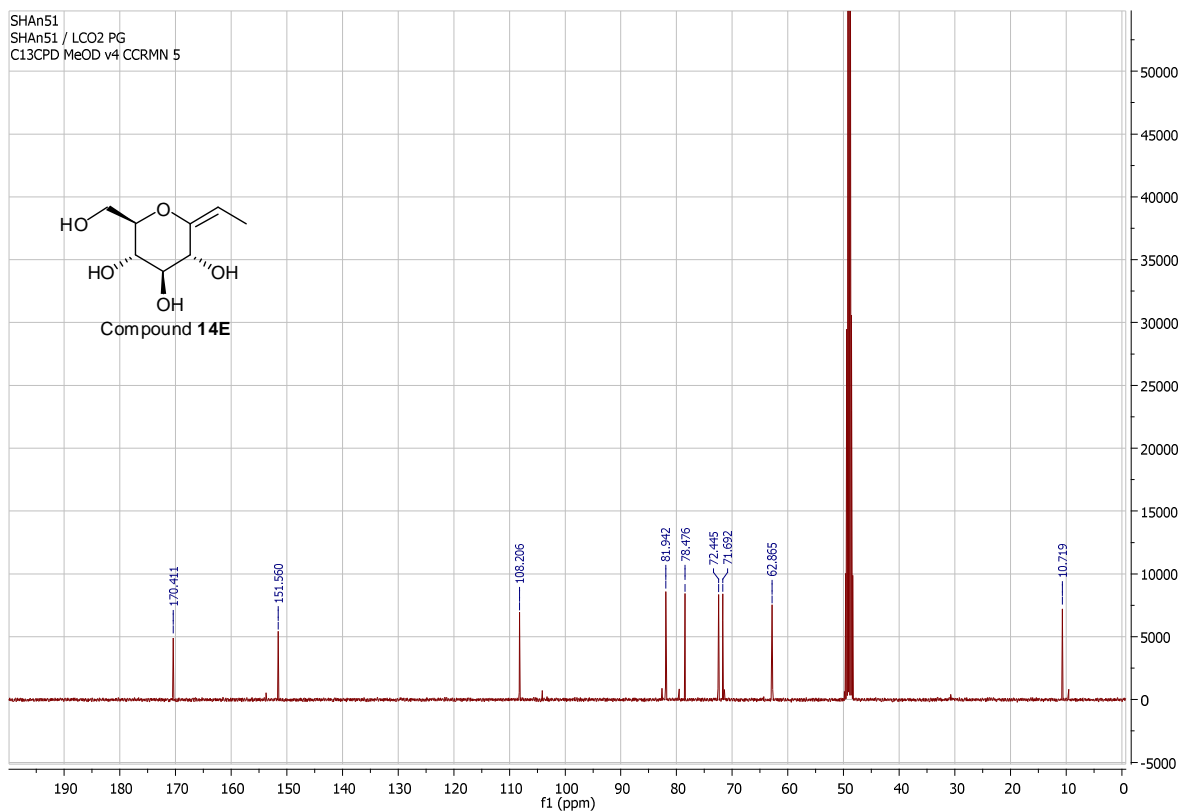

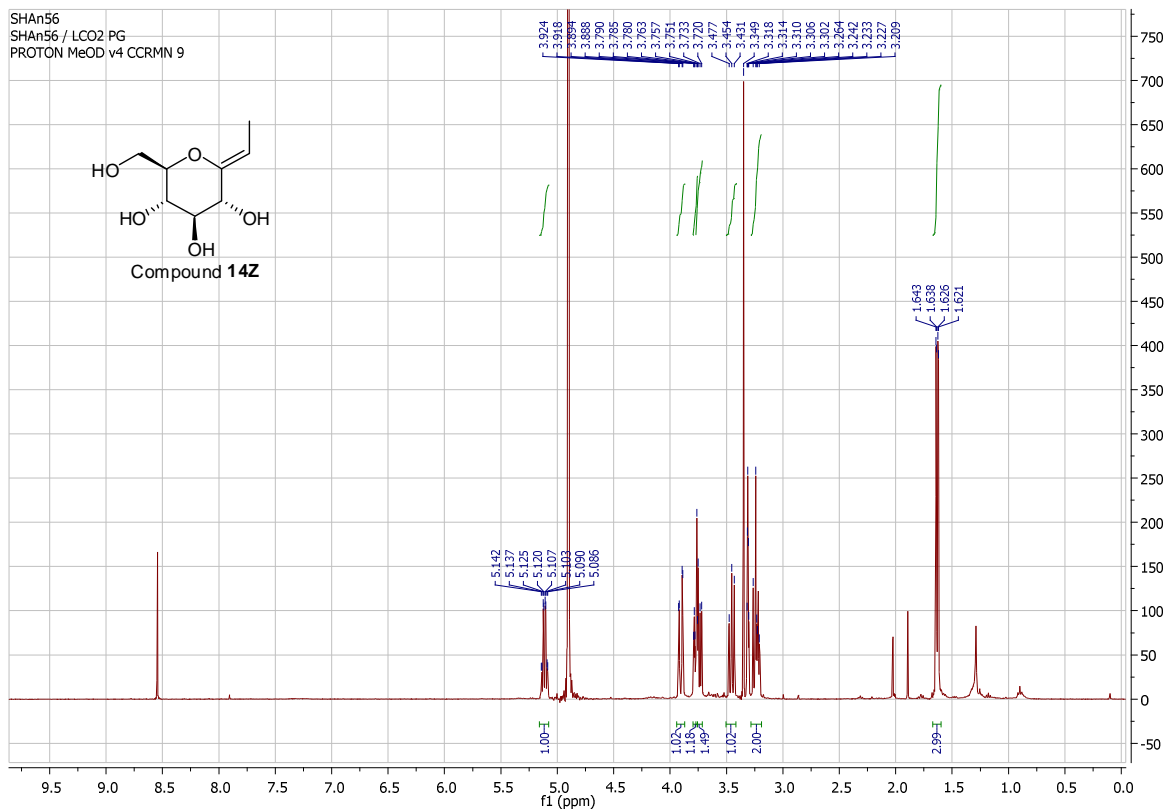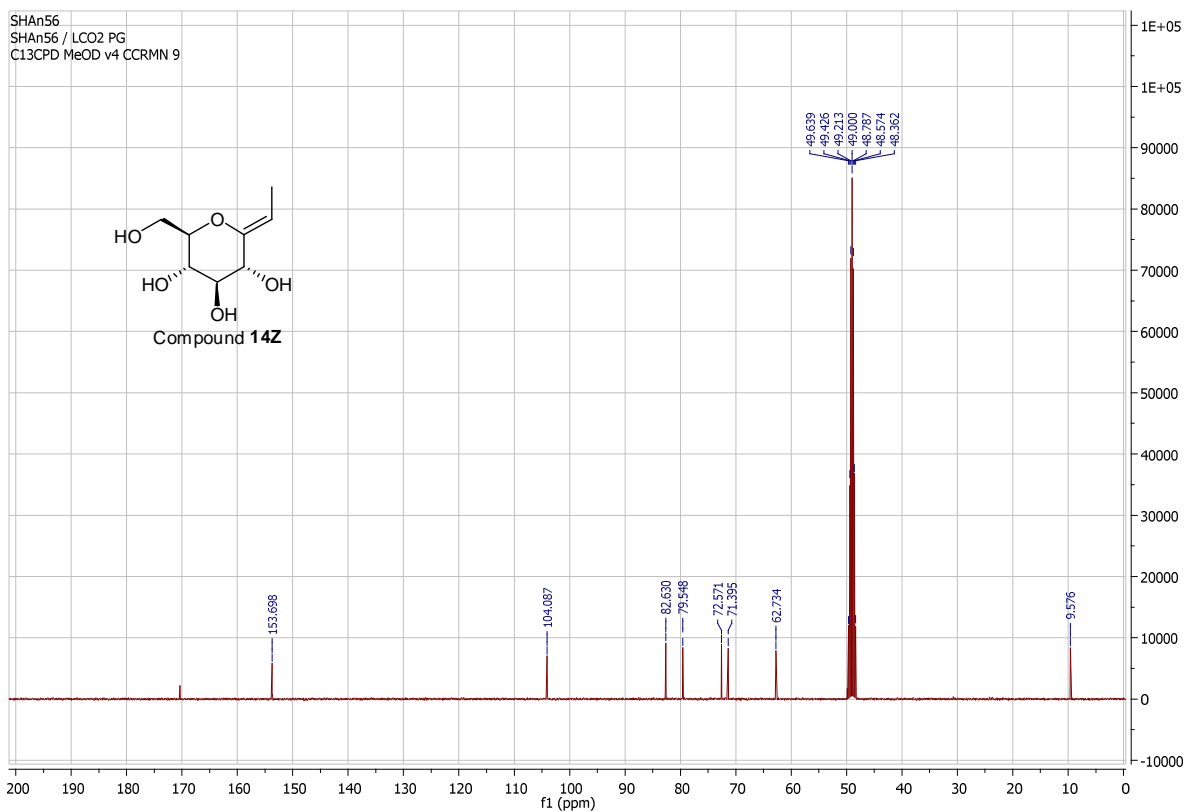

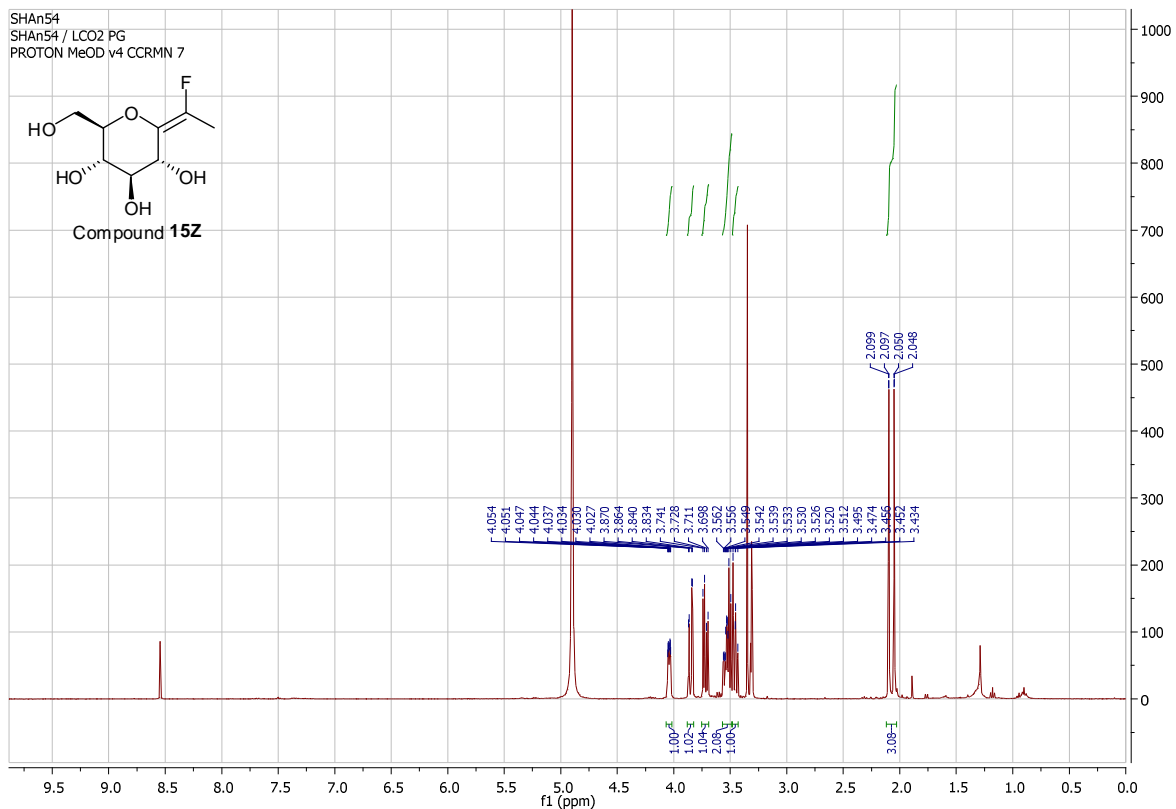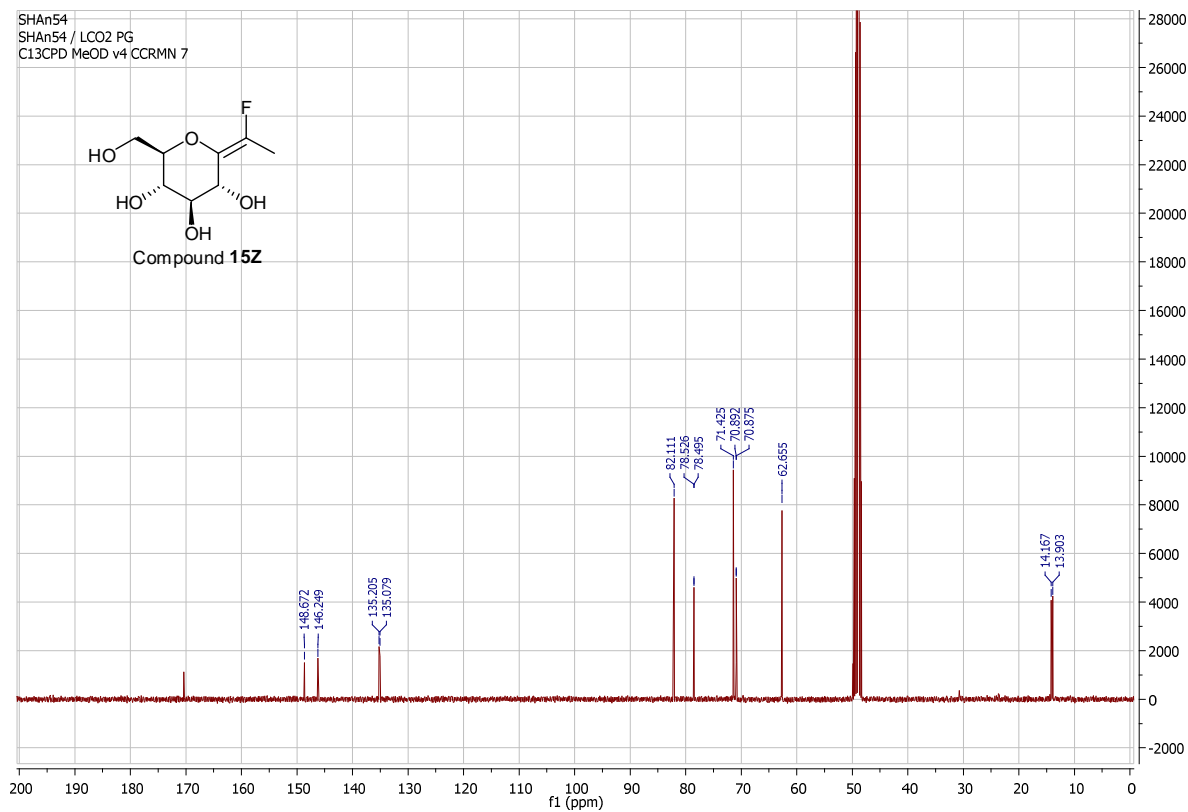

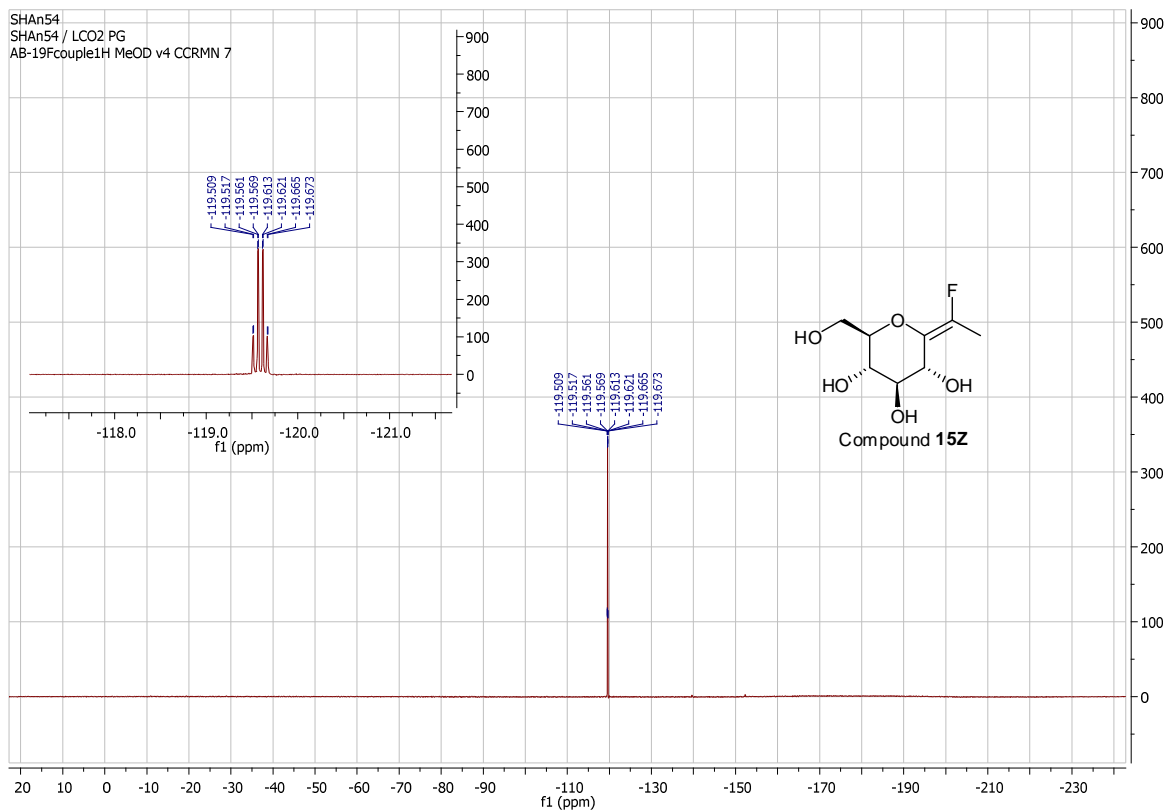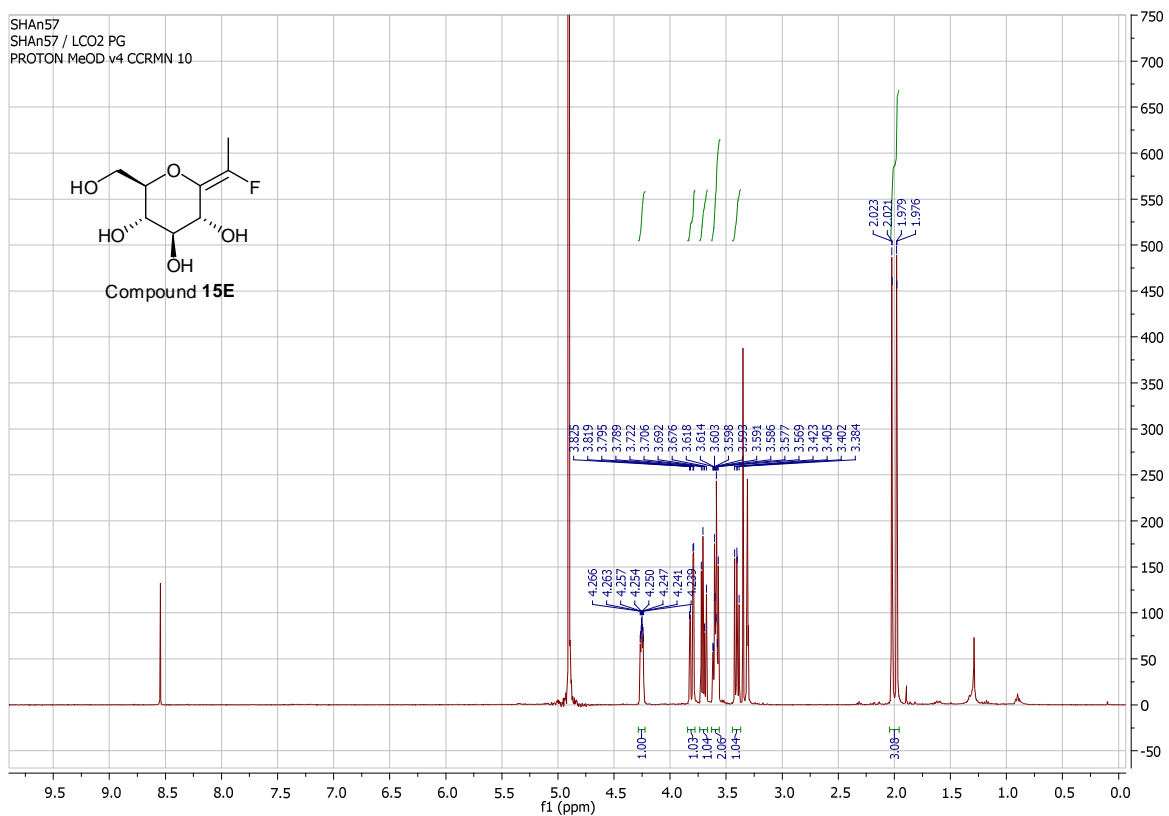

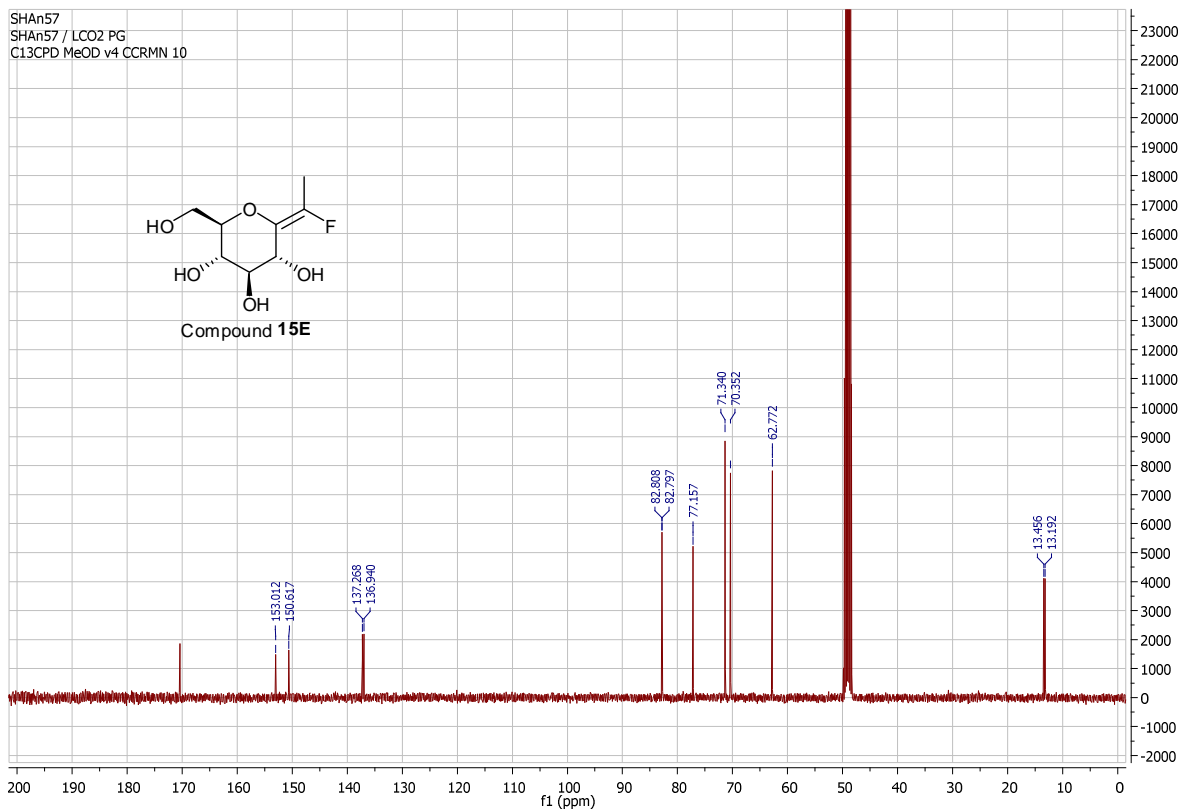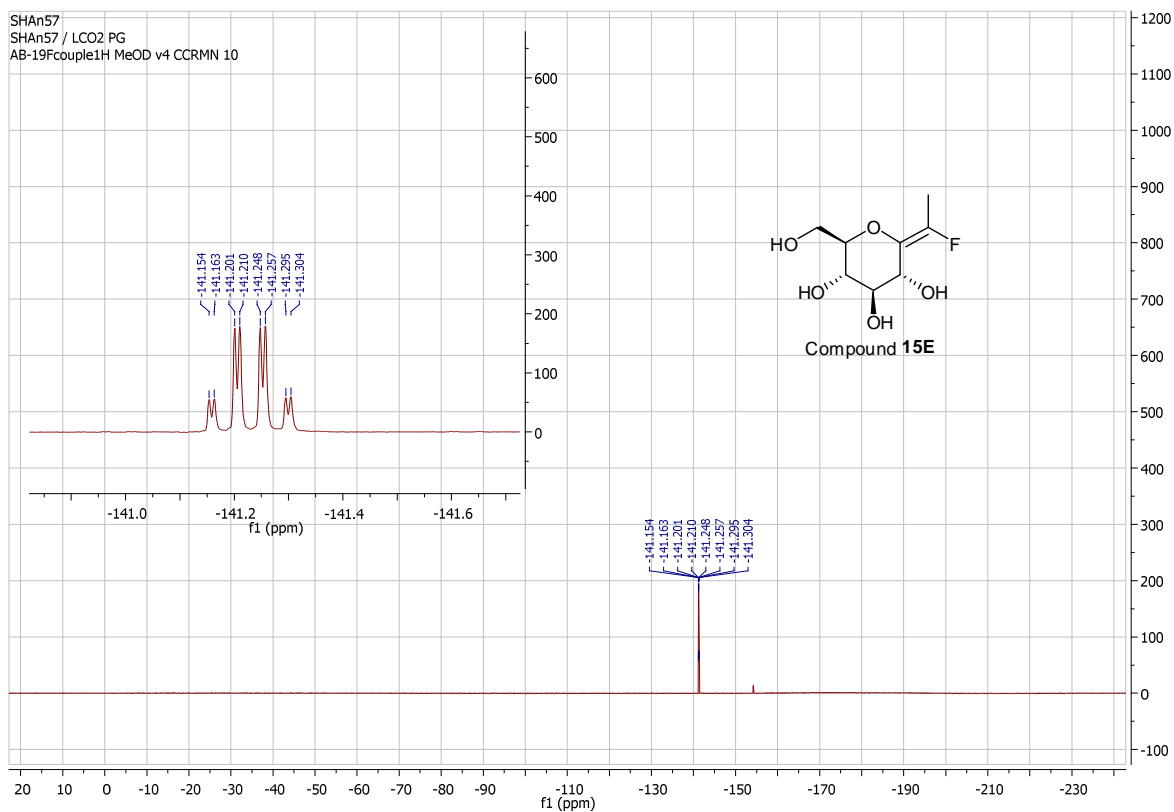

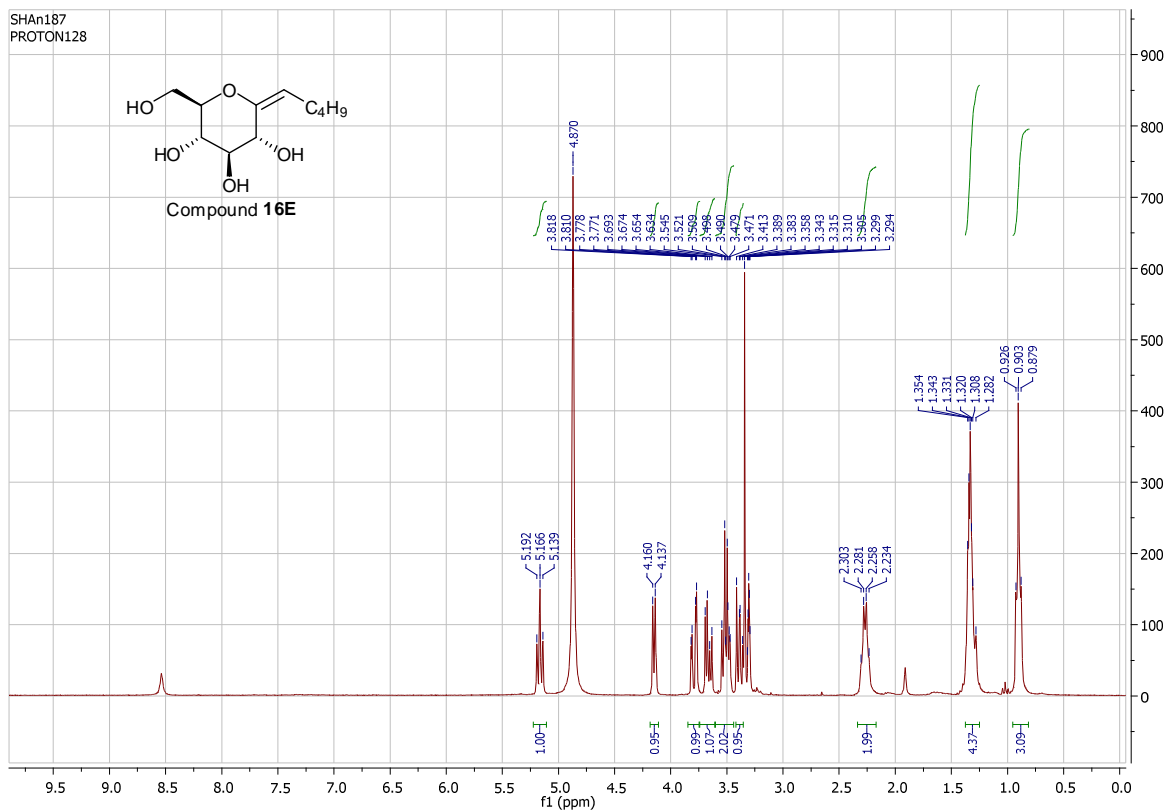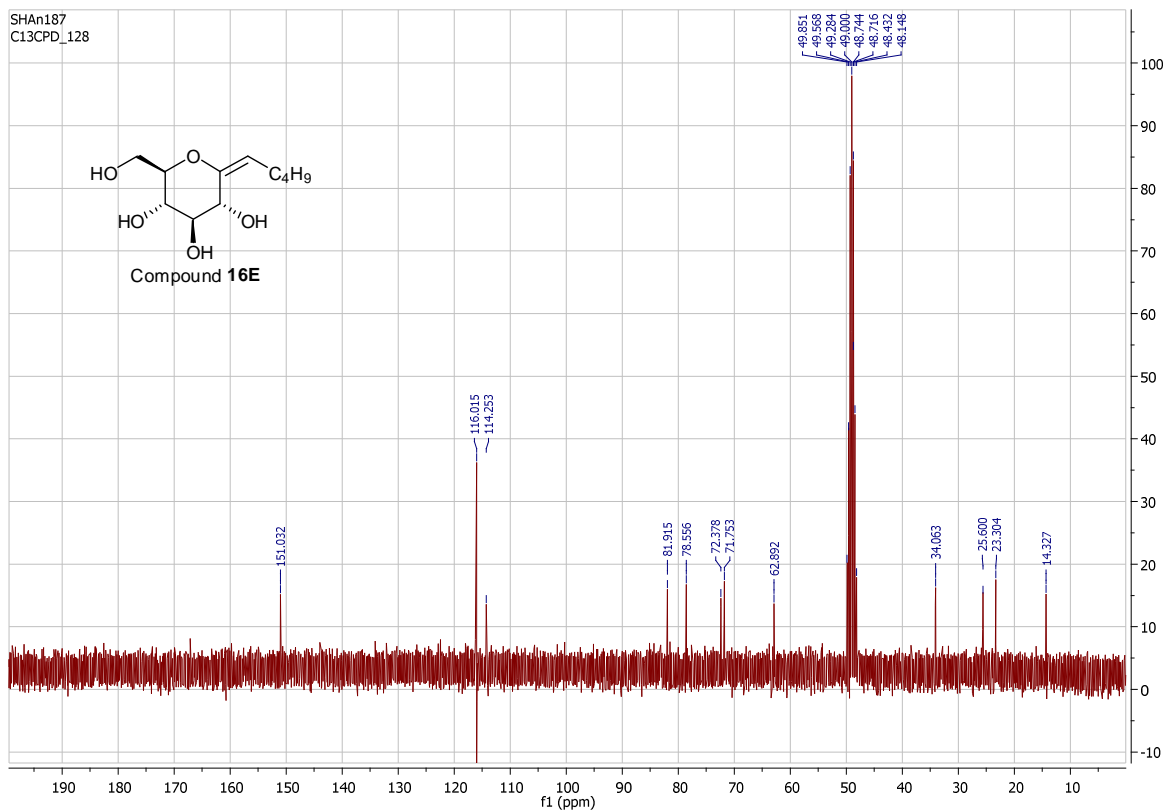

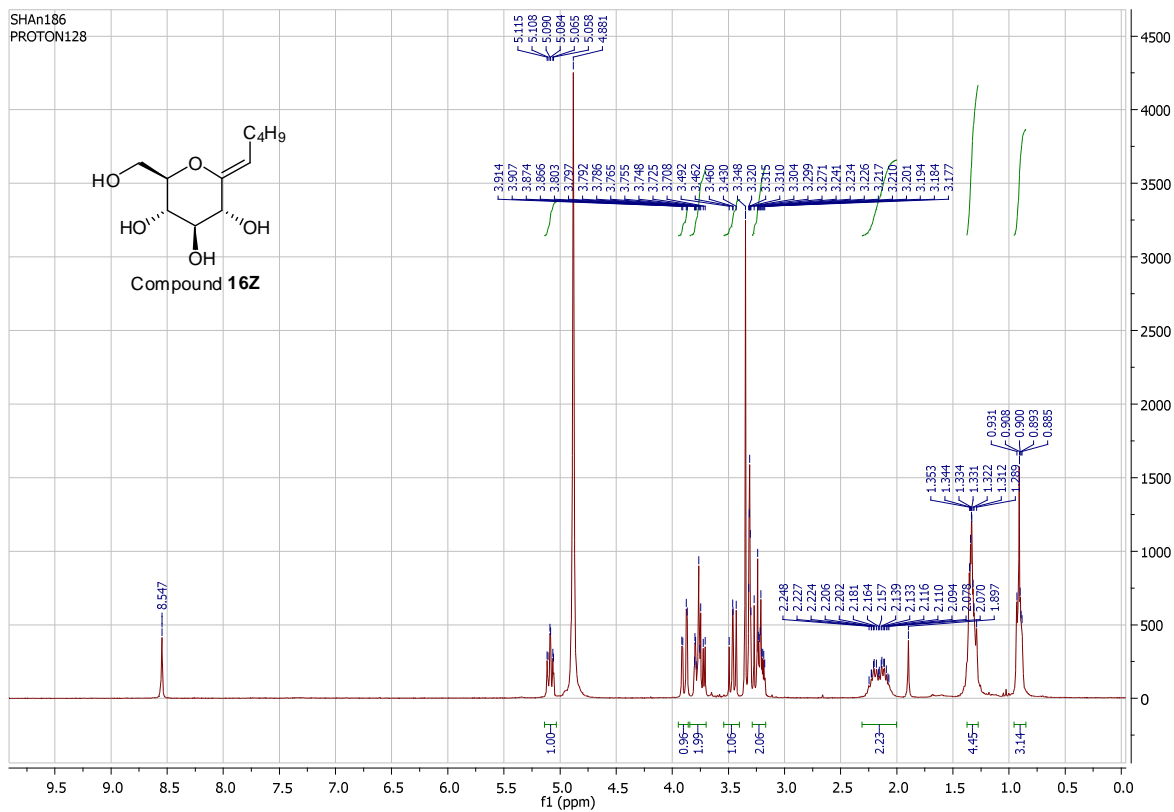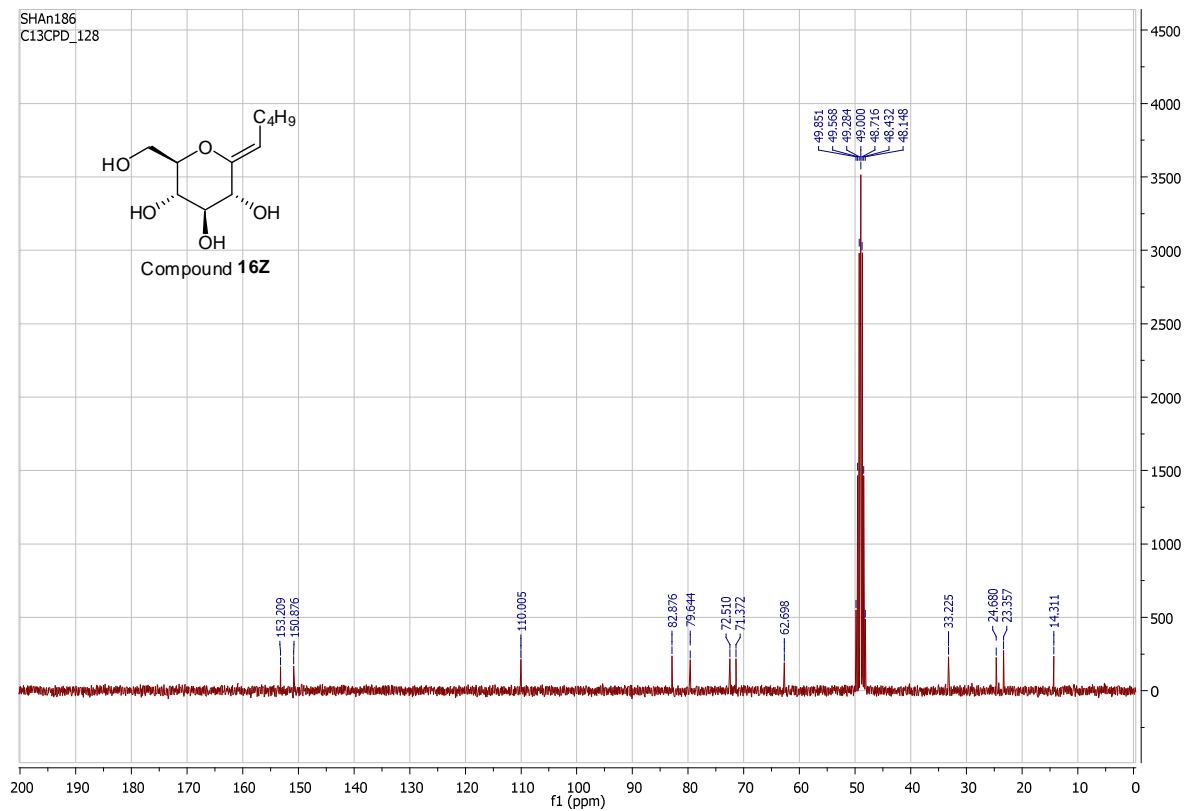

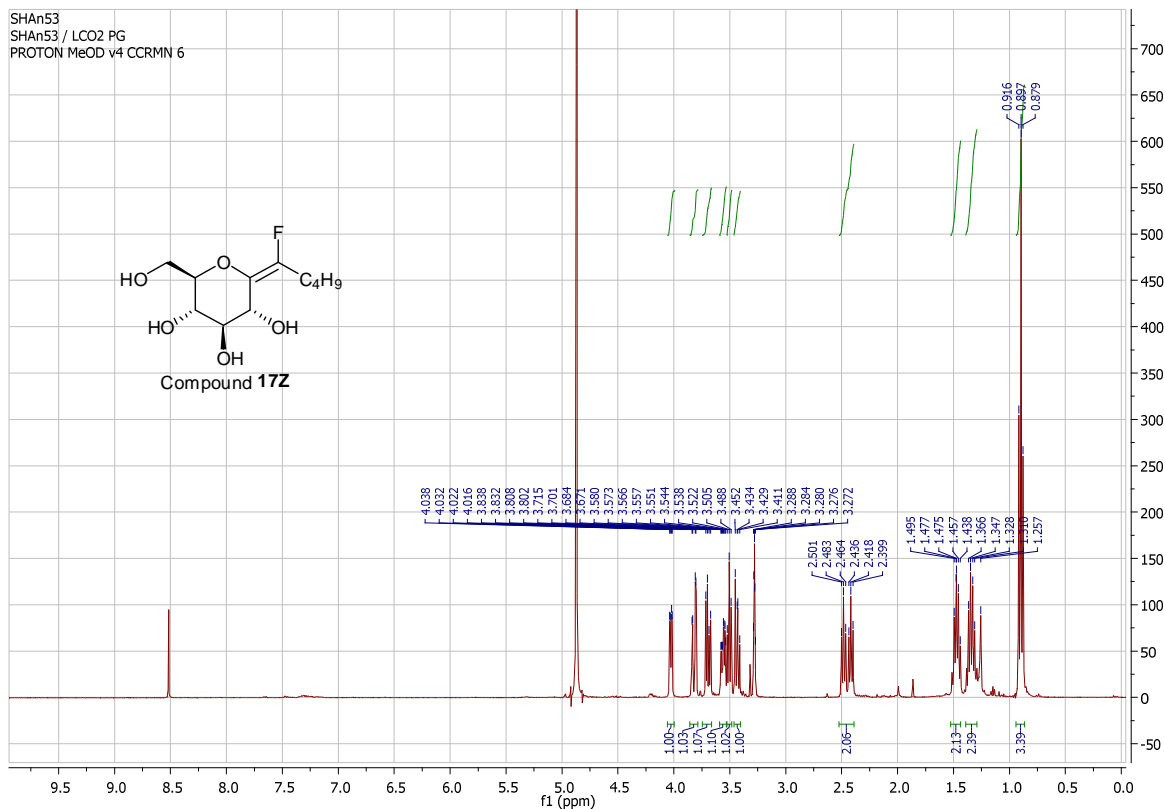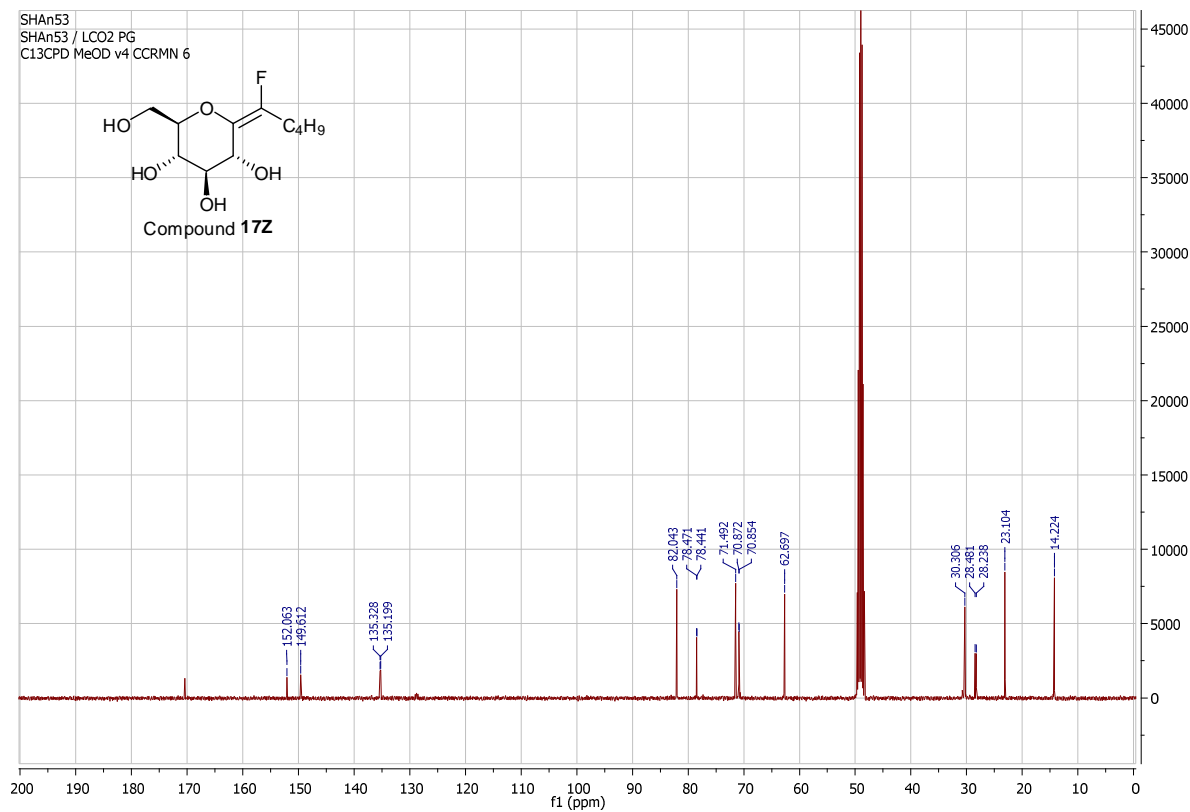



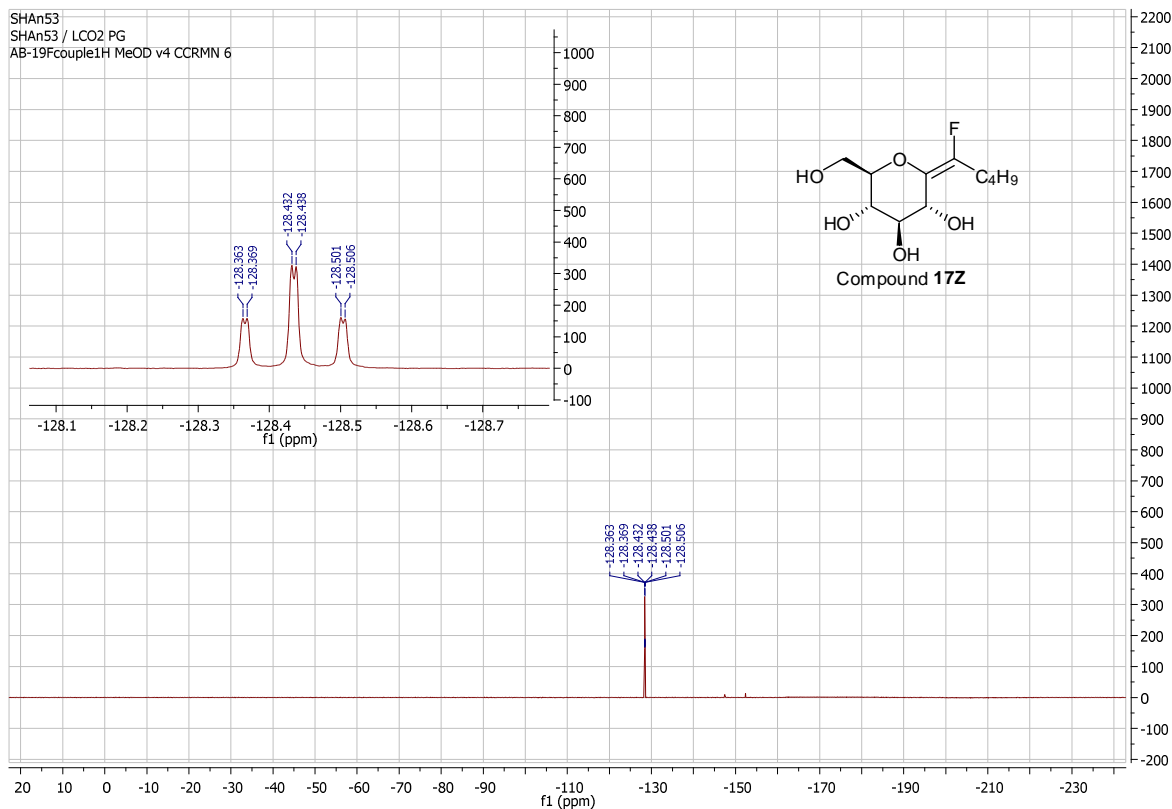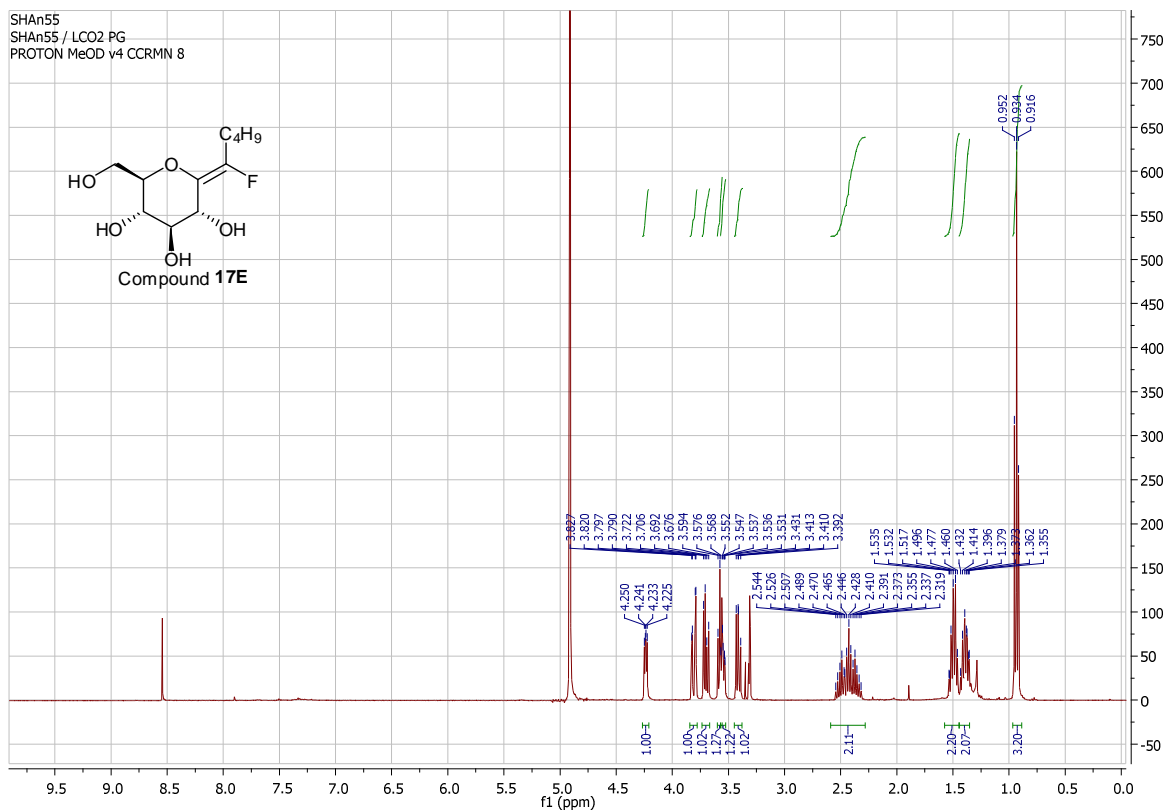

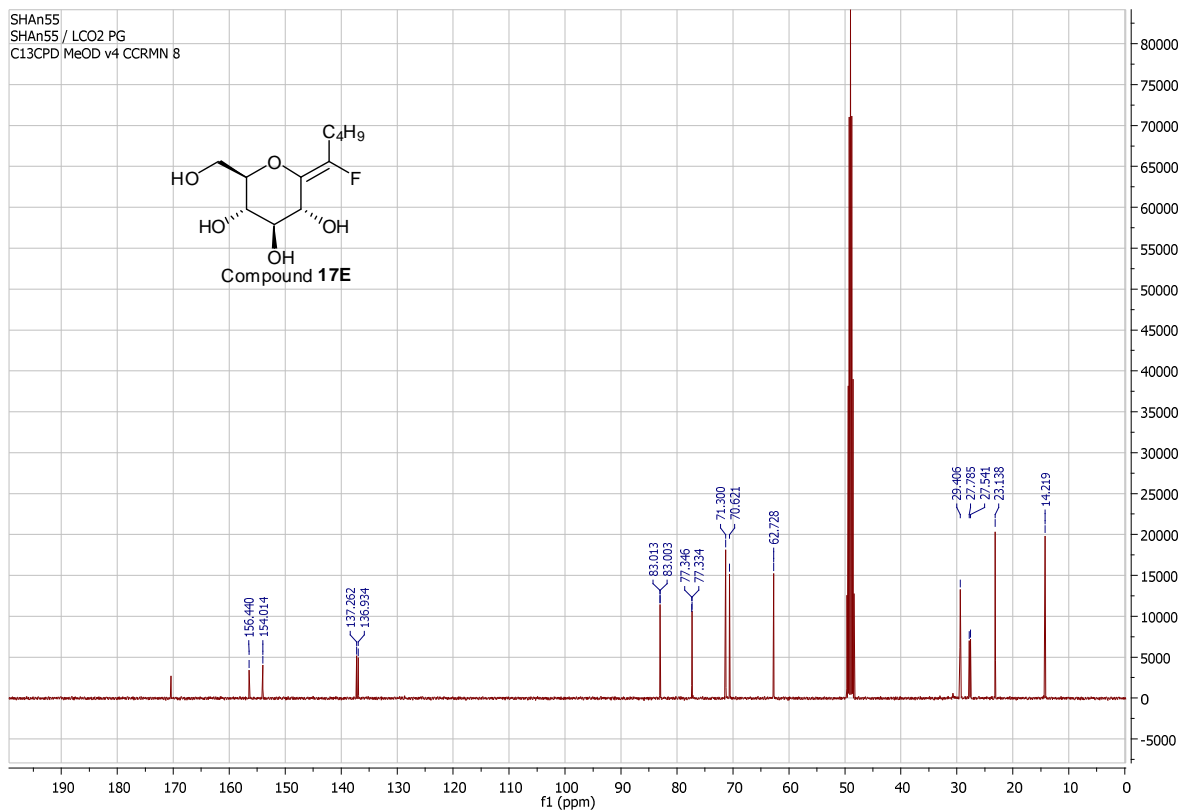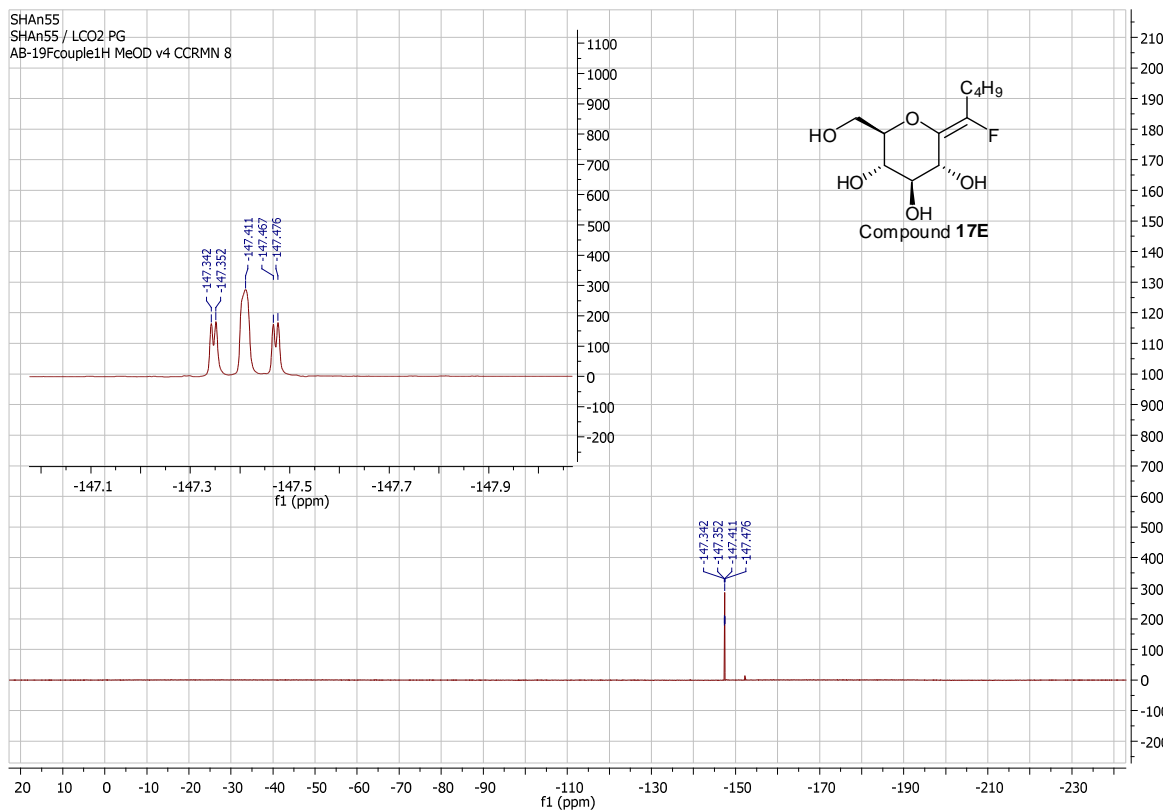

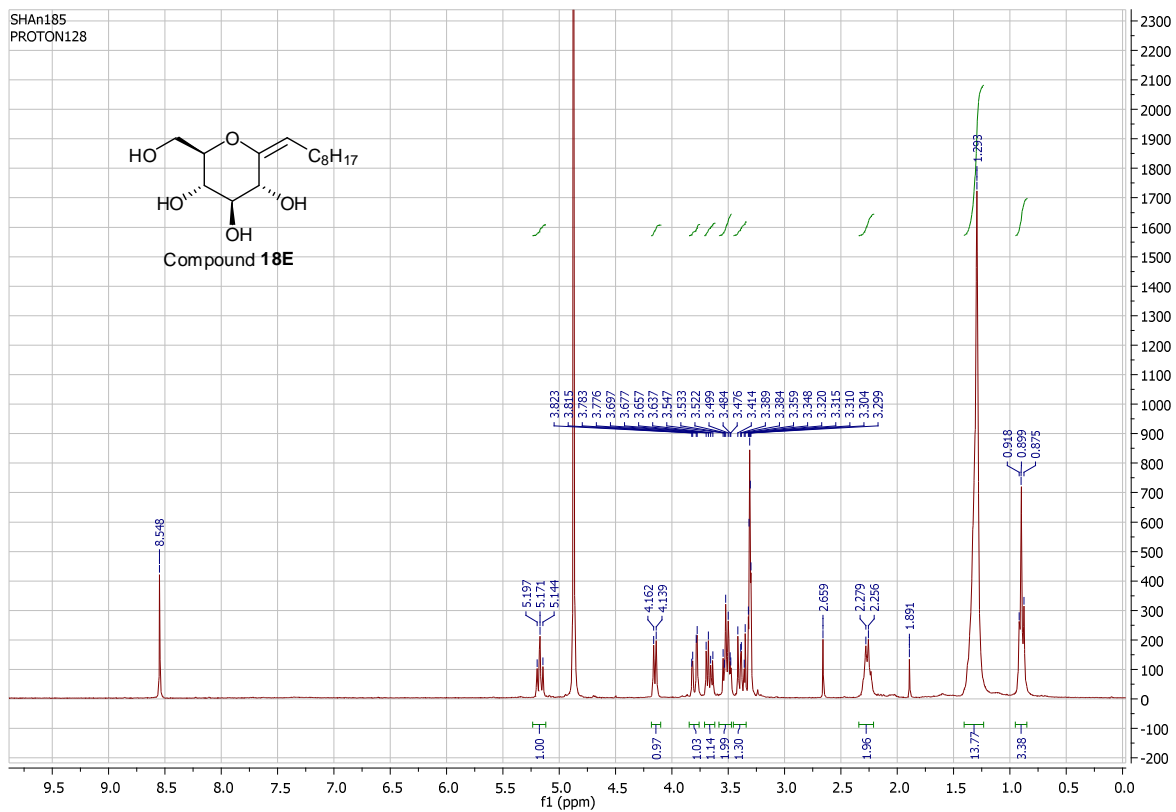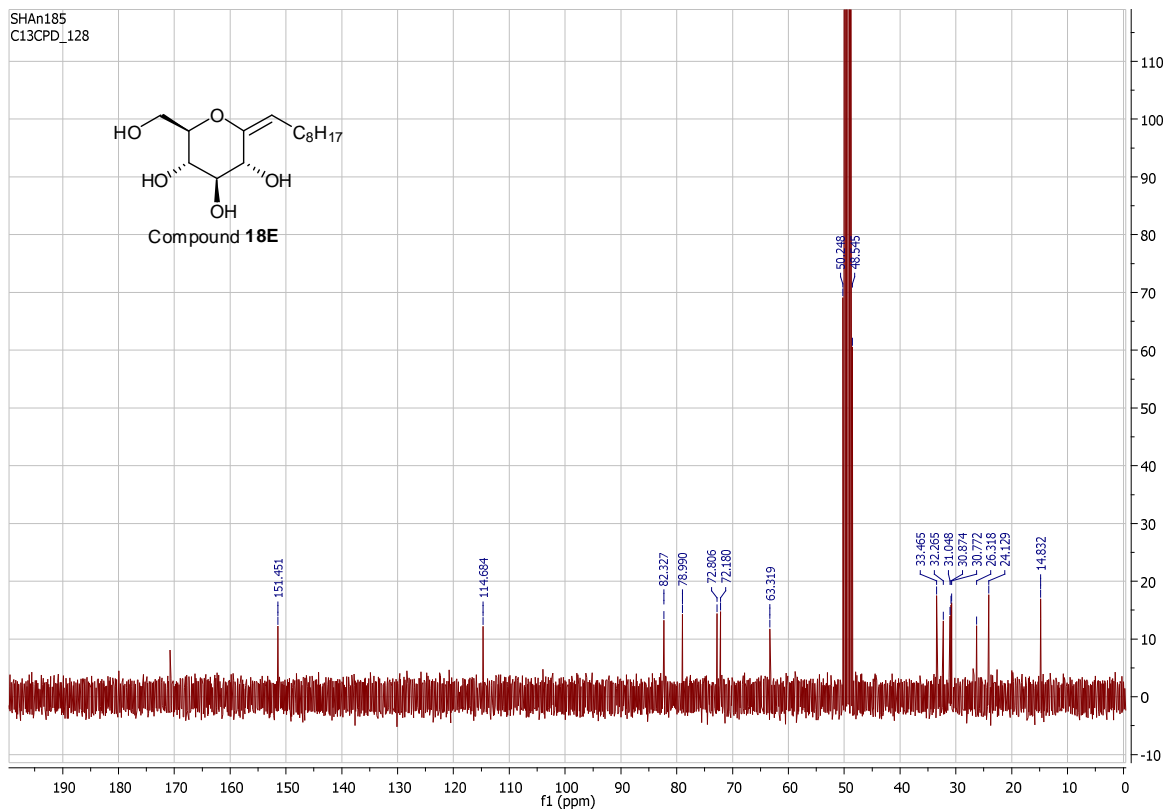

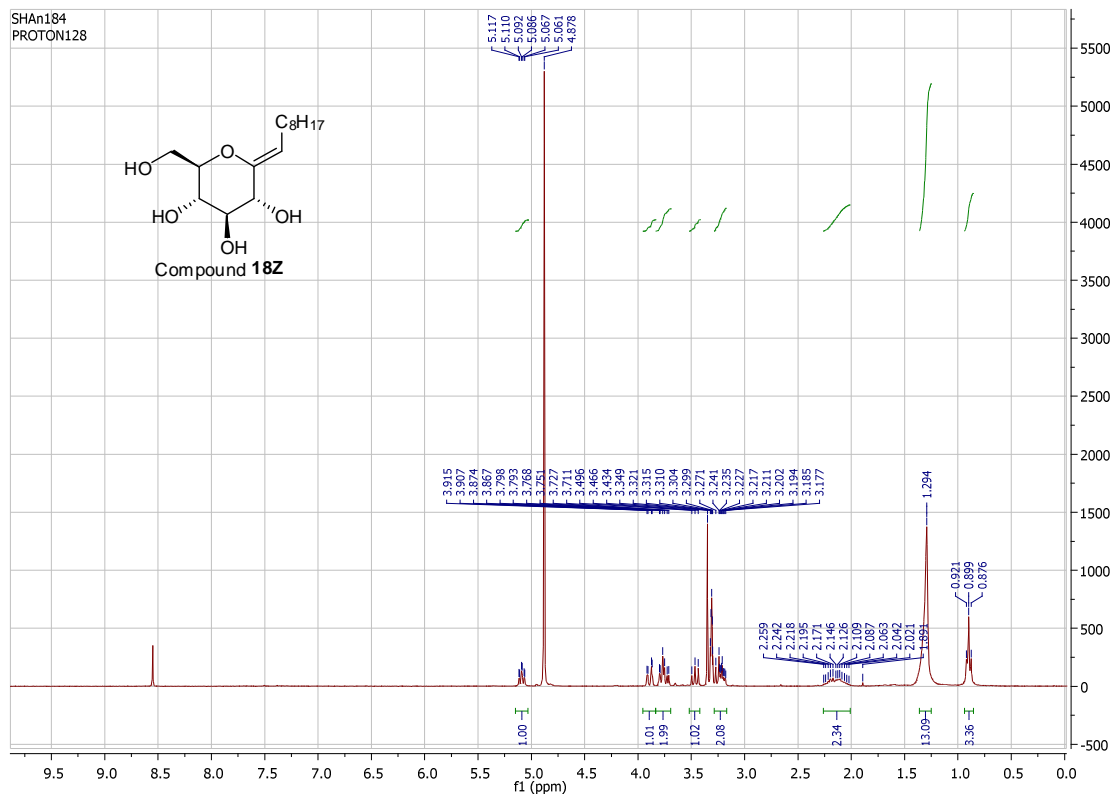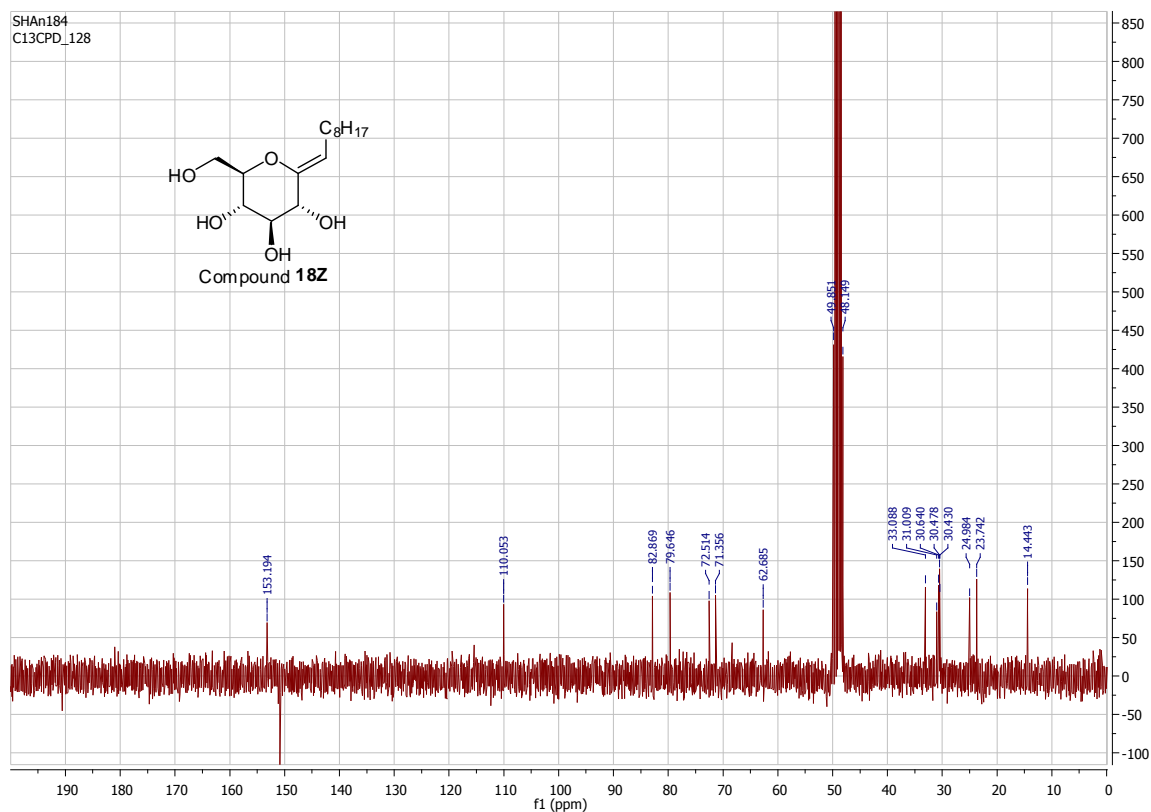

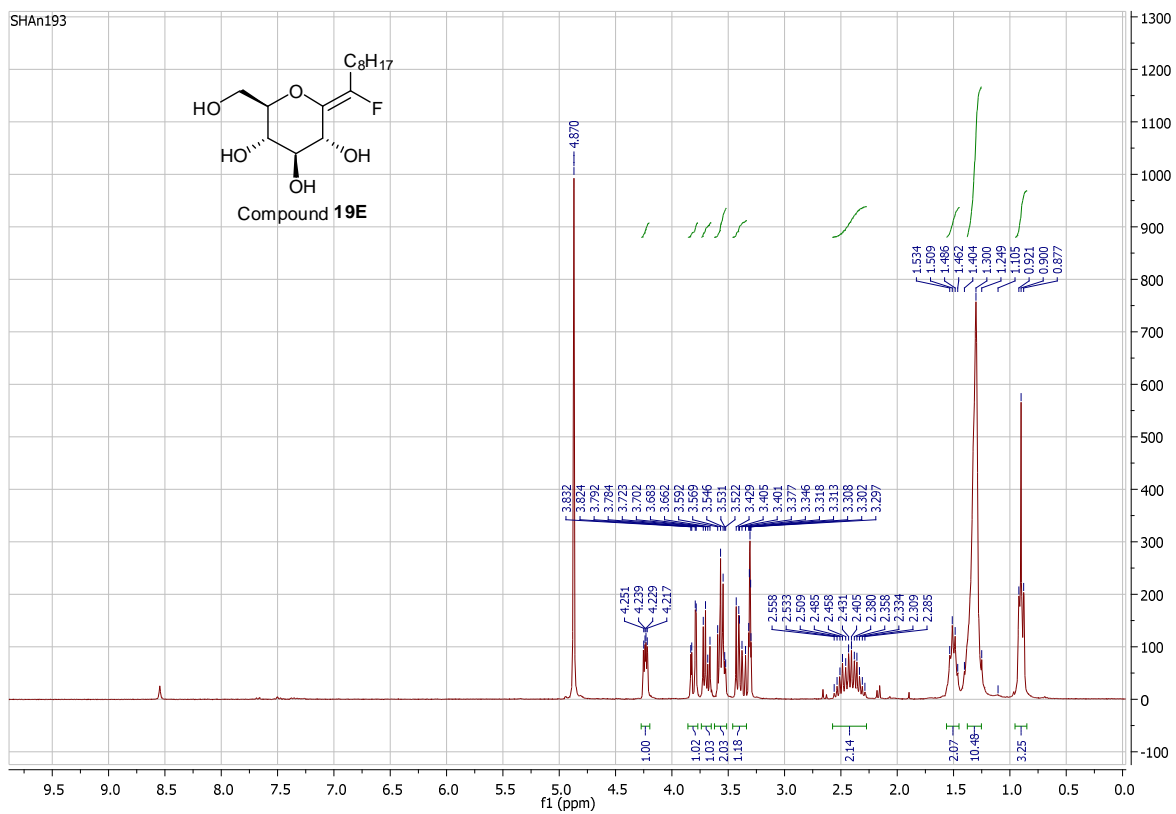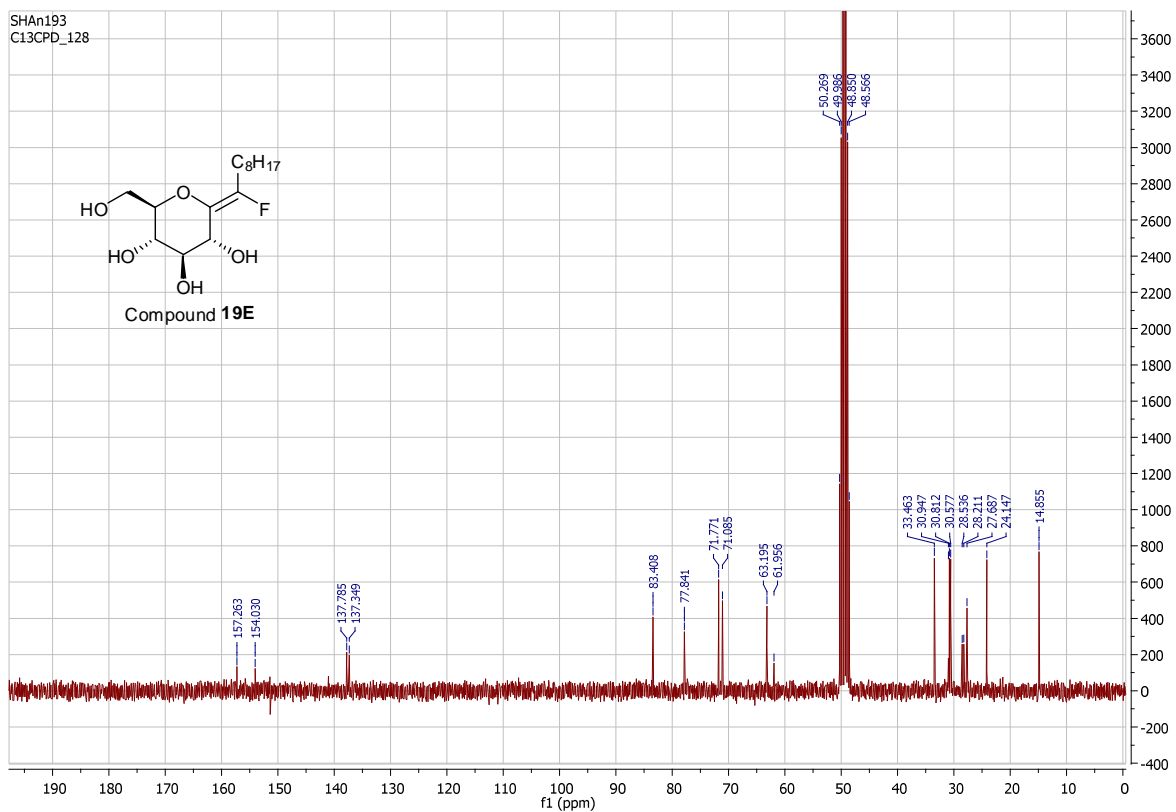

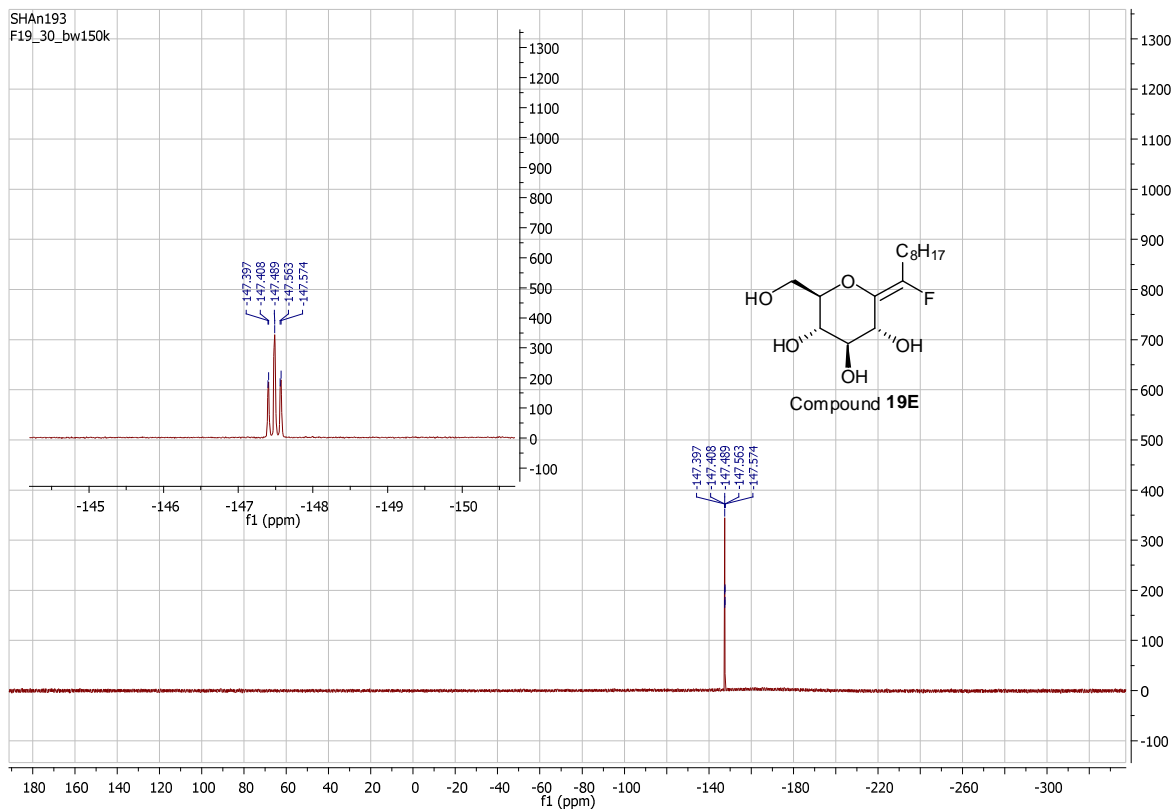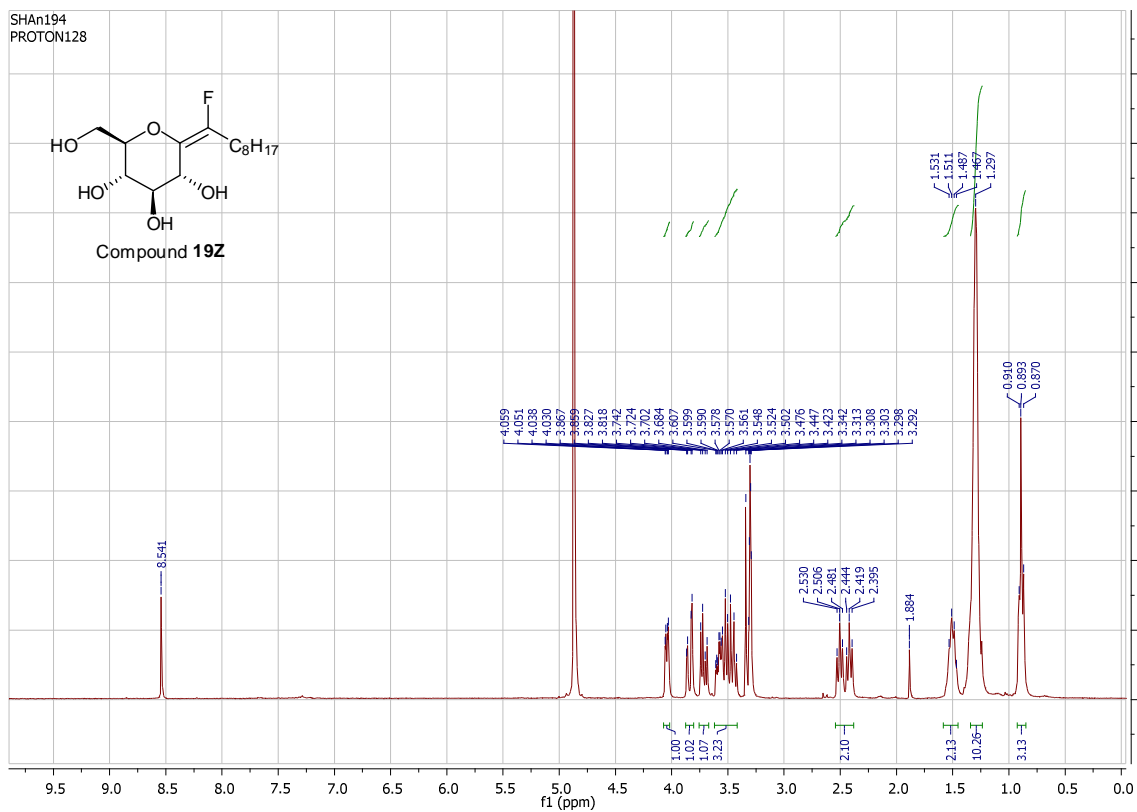

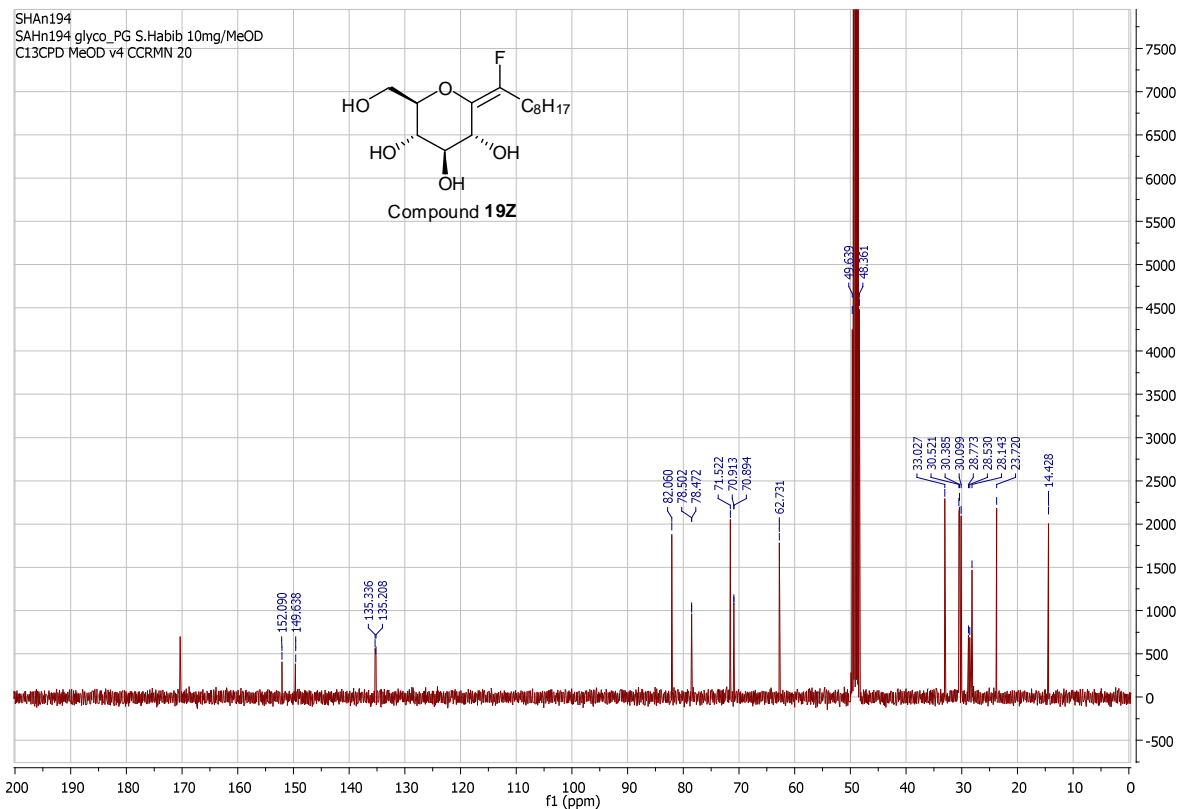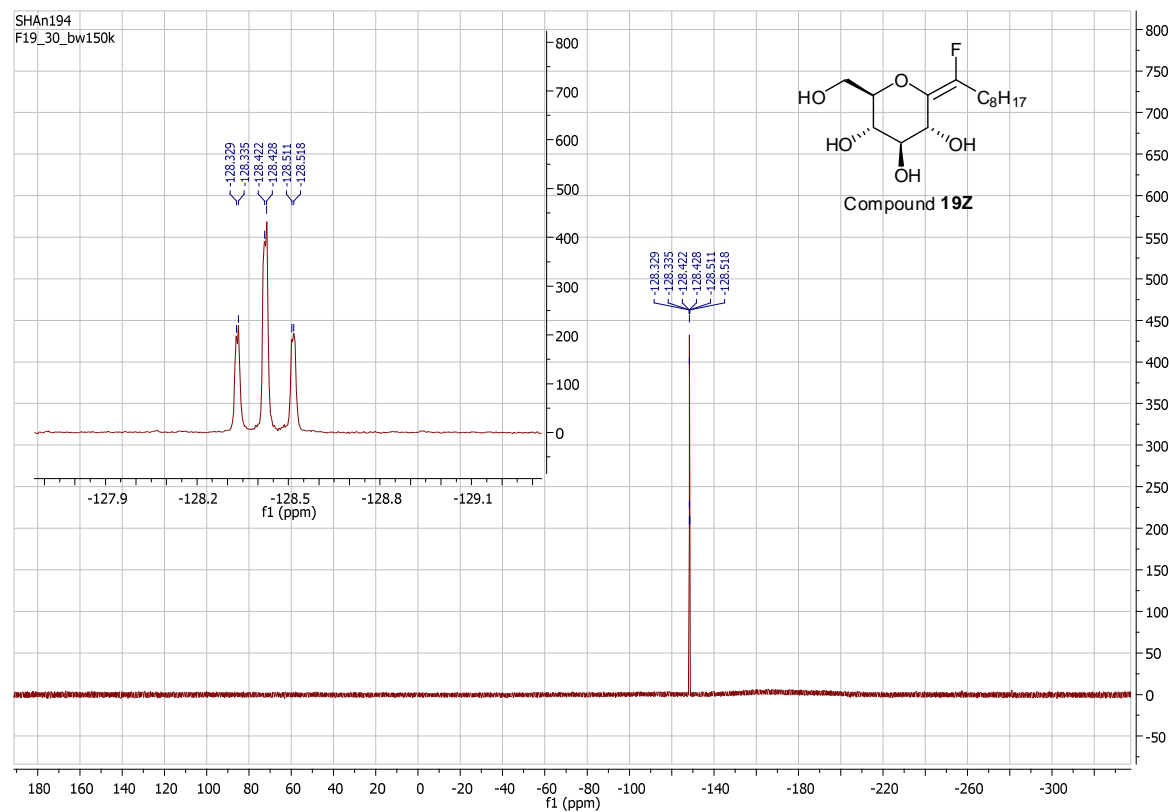

Supplement: c3ob41926f.pdf [file c3ob41926f.pdf]
